# Supplementary material for: Development of spirocyclic phosphoramidite-based hybrid diphosphorus ligands for enantioselective iridium-catalyzed hydrogenation of imines
Source: Royal Society of Chemistry journal article supplement (doi:10.1039/d2ob01801b), 2022-01-01

# **Development of spirocyclic phosphoramidite-based hybrid diphosphorus ligands for enantioselective iridium-catalyzed hydrogenation of imines**

Long-Fei Nan,<sup>a,b</sup> Xiu-Shuai Chen,<sup>b</sup> Hao Chen,<sup>a,b</sup> Xin-Hu Hu,<sup>b</sup> Xin-Hong Wang<sup>\*a</sup> and Xiang-Ping  
Hu<sup>\*b</sup>

<sup>a</sup> School of Textile and Material Engineering, Dalian Polytechnic University, Dalian 116034,  
China. E-mail: qywxh@163.com.

<sup>b</sup> Dalian Institute of Chemical Physics, Chinese Academy of Sciences, 457 Zhongshan Road,  
Dalian 116023, China. E-mail: xiangping@dicp.ac.cn.

## **Supporting Information**

|                                                                                        |            |
|----------------------------------------------------------------------------------------|------------|
| <b>General information.....</b>                                                        | <b>S2</b>  |
| <b>General procedure for synthesis of ligands L<sub>3</sub> and L<sub>4</sub>.....</b> | <b>S2</b>  |
| <b>General procedure for asymmetric hydrogenation of imines 4 or 6.....</b>            | <b>S4</b>  |
| <b>Gram-scale synthesis and derivatizations of 5k.....</b>                             | <b>S22</b> |
| <b>References.....</b>                                                                 | <b>S24</b> |
| <b>NMR spectra.....</b>                                                                | <b>S25</b> |

## General information

All reactions were carried out under a nitrogen atmosphere. Solvents were purified by standard procedure before use. Commercial reagents were used without further purification. Flash chromatography was performed on silica gel 60 (40–63  $\mu\text{m}$ , 60 Å). Thin layer chromatography (TLC) was performed on glass plates coated with silica gel 60 with F254 indicator. Proton nuclear magnetic resonance ( $^1\text{H}$  NMR) spectra were recorded on a Bruker 400 MHz spectrometer. Chemical shifts for protons are reported in parts per million downfield from tetramethylsilane and are referenced to residual protium in the NMR solvent ( $\text{CHCl}_3 = \delta$  7.26). Carbon nuclear magnetic resonance ( $^{13}\text{C}$  NMR) spectra were recorded on a Bruker 100 MHz spectrometer. Chemical shifts for carbon are reported in parts per million downfield from tetramethylsilane and are referenced to the carbon resonances of the solvent ( $\text{CDCl}_3 = \delta$  77.07). Phosphorus nuclear magnetic resonance ( $^{31}\text{P}$  NMR) spectra were recorded on a Bruker 162 MHz spectrometer. Chemical shifts for phosphorus are reported in parts per million downfield from the external 85%  $\text{H}_3\text{PO}_4$  signal at 0.0 ppm as a standard. Data are represented as follows: chemical shift, multiplicity (br = broad, s = singlet, d = doublet, t = triplet, q = quartet, m = multiplet), coupling constants in Hertz (Hz) integration. Enantiomeric ratios were determined by chiral HPLC with *n*-hexane and *i*-PrOH as solvents. Optical rotations were recorded on a JASCO P-1020 polarimeter.

## General procedure for synthesis of ligands **L**<sub>3</sub> and **L**<sub>4</sub>

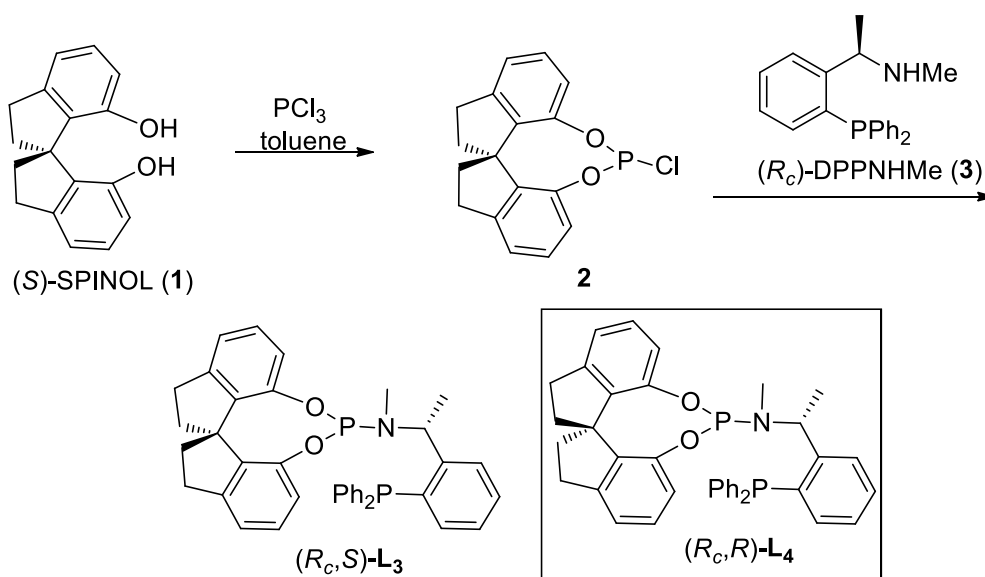

**Step 1:** A solution of (S) or (R)-SPINOL (1.0 mmol), freshly distilled  $\text{PCl}_3$  (1.0 mL), and 3 drops

of *N*-Methyl-2-pyrrolidone in dry toluene (10 mL) was stirred for 1 h at refluxing temperature. The reaction mixture was concentrated in vacuo and the residue was distilled twice azeotropically with absolute toluene to give **2**, which could be used directly for the next step with further purification.

**Step 2:** To a stirred solution of **2** (1.0 mmol) in dried toluene (4.0 mL) at 0 °C was added a solution of (*R*)-DPPNHMe (1.0 mmol) and NEt<sub>3</sub> (3.0 mmol) in dried toluene (4.0 mL) within 30 min. The resulting mixture was stirred overnight at room temperature. The precipitate was filtered, and the solid was washed with toluene. The filtrate was collected, and concentrated under reduced pressure to give the crude product which was further purified by column chromatography to afford ligand **L<sub>3</sub>** or **L<sub>4</sub>**.

(*R<sub>c</sub>,S*)-**L<sub>3</sub>**. 390 mg (65% yield) of (*R<sub>c</sub>,S*)-**L<sub>3</sub>** was obtained as a white solid after the purification by silica gel column chromatography using hexanes/triethylamine (20/1). M.p.: 95 – 97 °C; [ $\alpha$ ]<sub>D</sub><sup>25</sup> = –136.9 (*c* 1.0, CHCl<sub>3</sub>). <sup>1</sup>H NMR (400 MHz, CDCl<sub>3</sub>):  $\delta$  7.52 (dd, *J* = 7.9, 4.5 Hz, 1H), 7.34 – 7.16 (m, 11H), 7.08 (dt, *J* = 12.0, 7.6 Hz, 2H), 6.98 – 6.84 (m, 4H), 6.77 (d, *J* = 7.9 Hz, 1H), 6.62 (d, *J* = 7.8 Hz, 1H), 5.23 (dt, *J* = 10.8, 6.7 Hz, 1H), 2.96 (ddt, *J* = 18.8, 14.5, 7.1 Hz, 2H), 2.71 (dt, *J* = 15.4, 7.4 Hz, 2H), 2.13 (ddd, *J* = 17.9, 11.8, 6.2 Hz, 2H), 1.93 – 1.83 (m, 2H), 1.59 (d, *J* = 2.4 Hz, 3H), 1.51 (d, *J* = 6.9 Hz, 3H); <sup>13</sup>C NMR (101 MHz, CDCl<sub>3</sub>):  $\delta$  149.0, 148.9, 147.1, 147.1, 145.6, 145.1, 142.1, 140.6, 137.3, 137.2, 136.1, 134.4, 134.0, 133.8, 128.7, 128.7, 128.6, 128.6, 128.5, 128.5, 128.5, 128.5, 128.4, 128.2, 127.5, 127.4, 121.7, 121.6, 121.5, 121.0, 120.9, 120.3, 58.8, 56.2, 38.3, 38.2, 30.9, 30.6, 29.0, 29.0, 21.2, 21.0; <sup>31</sup>P NMR (162 MHz, CDCl<sub>3</sub>):  $\delta$  126.1 (d, *J* = 55.2 Hz), –17.9 (d, *J* = 54.9 Hz). HRMS (ESI): *m/z* calcd for C<sub>38</sub>H<sub>35</sub>NO<sub>2</sub>P<sub>2</sub> [M+H]<sup>+</sup>: 599.2216, found: 599.2198.

(*R<sub>c</sub>,R*)-**L<sub>4</sub>**. 354 mg (59% yield) as a white solid after the purification by silica gel column chromatography using hexanes/triethylamine (20/1). M.p.: 99 – 101 °C; [ $\alpha$ ]<sub>D</sub><sup>25</sup> = +74.3 (*c* 1.0, CHCl<sub>3</sub>). <sup>1</sup>H NMR (400 MHz, CDCl<sub>3</sub>):  $\delta$  7.57 (dd, *J* = 7.8, 4.5 Hz, 1H), 7.44 – 7.17 (m, 15H), 7.09 – 6.90 (m, 6H), 6.47 (dd, *J* = 5.7, 3.3 Hz, 1H), 5.21 (q, *J* = 7.1 Hz, 1H), 3.16 – 2.94 (m, 1H), 2.84 (dd, *J* = 15.5, 7.8 Hz, 2H), 2.24 (td, *J* = 12.5, 6.3 Hz, 2H), 1.98 (td, *J* = 11.6, 8.0 Hz, 2H), 1.62 (dt, *J* = 10.6, 3.5 Hz, 6H); <sup>13</sup>C NMR (101 MHz, CDCl<sub>3</sub>):  $\delta$  148.9, 148.8, 146.5, 146.4, 145.8, 145.8, 145.2, 142.4, 142.3, 140.7, 137.0, 136.9, 136.7, 136.6, 134.1, 134.0, 133.9, 133.9, 133.8, 129.4, 128.8, 128.7, 128.6, 128.6, 128.5, 128.4, 127.3, 126.0, 121.6, 121.4, 121.4, 121.2, 120.3, 58.8, 38.4, 38.2, 31.0, 30.6, 30.4, 30.3; <sup>31</sup>P NMR (162 MHz, CDCl<sub>3</sub>):  $\delta$  124.7 (d, *J* = 19.0 Hz), –18.2. HRMS (ESI): *m/z* calcd for C<sub>38</sub>H<sub>35</sub>NO<sub>2</sub>P<sub>2</sub> [M+H]<sup>+</sup>: 599.2216, found: 599.2215.

## General procedure for asymmetric hydrogenation of imines **4** or **6**

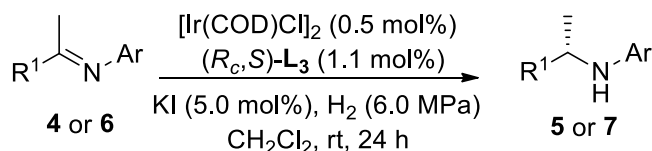

In a nitrogen-filled glovebox, a stainless steel autoclave was charged with  $[\text{Ir}(\text{COD})\text{Cl}]_2$  (0.001 mmol),  $(\text{R}_c, \text{S})\text{-L}_3$  (0.0022 mmol) and KI (0.01 mmol) in 1.0 mL of degassed  $\text{CH}_2\text{Cl}_2$ . After stirring for 1 h at room temperature, a solution of imines **4** or **6** (0.2 mmol) in 1.0 mL of the same solvent was added to the reaction mixture, and then the hydrogenation was performed at room temperature under a  $\text{H}_2$  pressure of 6.0 MPa for 24 or 36 h. The solvent was then evaporated and the residue was purified by flash column chromatography to give the corresponding hydrogenation product **5** or **7** which was analyzed by chiral GC or chiral HPLC to determine enantiomeric excesses.

**(S)-N-(1-Phenylethyl)-2,6-dimethylbenzenamine 5a.**<sup>1</sup> 43.5 mg (97% yield) of **5a** was obtained as a

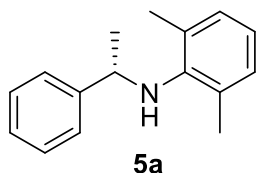

slight yellowish oil after purification with column chromatography on silica gel (hexanes/EtOAc, 20/1). 98% ee was determined by chiral HPLC (chiralcel OJ-H, *n*-hexane/*i*-PrOH = 90/10, flow rate = 1.0 mL/min, I = 254 nm, T = 40 °C):

$t_R$  = 4.6 min (major), 4.9 min (minor).  $[\alpha]_D^{25} = -131.3$  ( $c$  1.0,  $\text{CHCl}_3$ ).  $^1\text{H}$  NMR (400 MHz,  $\text{CDCl}_3$ ):  $\delta$  7.43 – 7.23 (m, 5H), 7.00 (d,  $J$  = 7.4 Hz, 2H), 6.89 – 6.78 (m, 1H), 4.37 (qd,  $J$  = 6.7, 2.2 Hz, 1H), 3.00 (s, 1H), 2.22 (d,  $J$  = 1.8 Hz, 6H), 1.61 – 1.49 (m, 3H);  $^{13}\text{C}$  NMR (101 MHz,  $\text{CDCl}_3$ ):  $\delta$  145.3, 145.0, 129.5, 128.9, 128.5, 127.0, 126.2, 121.7, 56.8, 22.7, 19.0.

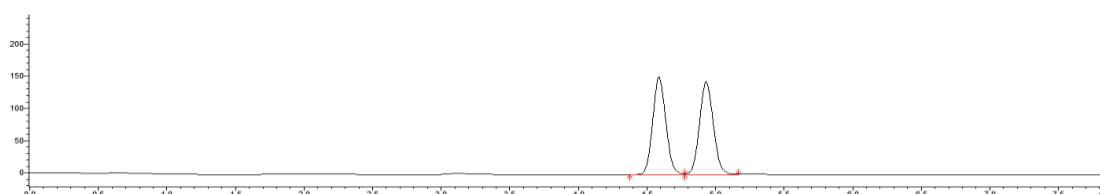

| Peak# | Ret. Time | Area    | Height | Conc.   | Name | Area%   |
|-------|-----------|---------|--------|---------|------|---------|
| 1     | 4.587     | 1005224 | 151119 | 49.904  |      | 49.904  |
| 2     | 4.931     | 1009075 | 144521 | 50.096  |      | 50.096  |
| Total |           | 2014299 | 295641 | 100.000 |      | 100.000 |

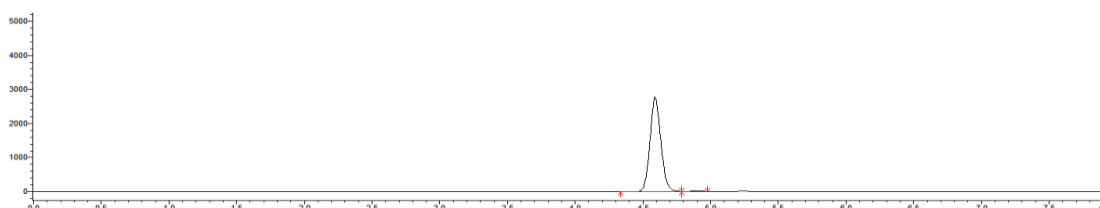

| Peak# | Ret. Time | Area     | Height  | Conc.   | Name | Area%   |
|-------|-----------|----------|---------|---------|------|---------|
| 1     | 4.589     | 15364898 | 2781450 | 99.162  |      | 99.162  |
| 2     | 4.903     | 129813   | 25893   | 0.838   |      | 0.838   |
| Total |           | 15494712 | 2807342 | 100.000 |      | 100.000 |

**(S)-N-[1-(4-Methoxyphenyl)ethyl]-2,6-dimethylbenzenamine 5b.**<sup>2</sup> 49.8 mg (97% yield) of **5b** was

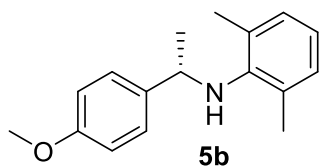

**5b**

obtained as a slight yellowish oil after purification with column chromatography on silica gel (hexanes/EtOAc, 20/1). 94% ee was determined by chiral HPLC (chiralcel OJ-H, *n*-hexane/*i*-PrOH = 98/2, flow

rate = 1.0 mL/min, I = 254 nm, T = 40 °C):  $t_R$  = 8.5 min (minor), 8.9 min (major).  $[\alpha]_D^{25} = -154.7$  (*c* 1.0, CHCl<sub>3</sub>). <sup>1</sup>H NMR (400 MHz, CDCl<sub>3</sub>): δ 7.30 – 7.19 (m, 2H), 6.98 (d, *J* = 7.5 Hz, 2H), 6.92 – 6.74 (m, 3H), 4.31 (q, *J* = 6.7 Hz, 1H), 3.81 (s, 3H), 3.04 (s, 1H), 2.20 (s, 6H), 1.52 (d, *J* = 6.7 Hz, 3H); <sup>13</sup>C NMR (101 MHz, CDCl<sub>3</sub>): δ 158.6, 145.0, 137.6, 129.5, 128.8, 127.2, 121.6, 113.7, 56.1, 55.3, 22.6, 19.0.

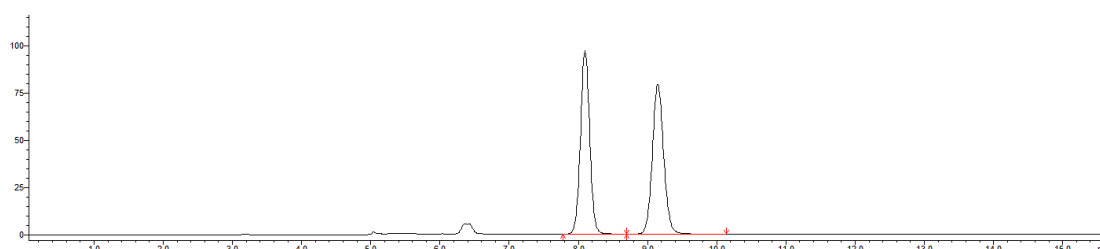

| Peak# | Ret. Time | Area    | Height | Conc.   | Name | Area%   |
|-------|-----------|---------|--------|---------|------|---------|
| 1     | 8.096     | 905160  | 97139  | 49.991  |      | 49.991  |
| 2     | 9.148     | 905493  | 79362  | 50.009  |      | 50.009  |
| Total |           | 1810653 | 176502 | 100.000 |      | 100.000 |

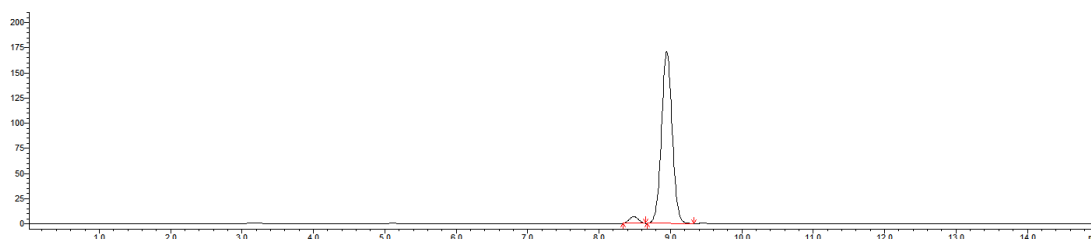

| Peak# | Ret. Time | Area    | Height | Conc.   | Name | Area%   |
|-------|-----------|---------|--------|---------|------|---------|
| 1     | 8.488     | 59480   | 6738   | 3.238   |      | 3.238   |
| 2     | 8.948     | 1777397 | 170869 | 96.762  |      | 96.762  |
| Total |           | 1836877 | 177607 | 100.000 |      | 100.000 |

**(S)-N-[1-(4-nitrophenyl)ethyl]-2,6-dimethylbenzenamine 5c.**<sup>1</sup> 54.1 mg (>99% yield) of **5c** was

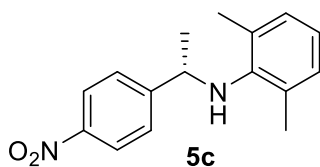

**5c**

obtained as a yellow oil after purification with column chromatography on silica gel (hexanes/EtOAc, 20/1). 96% ee was determined by chiral HPLC (chiralpak AD-H, *n*-hexane/*i*-PrOH = 99/1, flow rate = 1.0 mL/min, I =

254 nm, T = 40 °C):  $t_R$  = 9.2 min (major), 14.3 min (minor).  $[\alpha]_D^{25} = -248.1$  (*c* 1.0, CHCl<sub>3</sub>). <sup>1</sup>H NMR (400 MHz, CDCl<sub>3</sub>): δ 8.17 – 8.08 (m, 2H), 7.44 (d, *J* = 8.7 Hz, 2H), 6.95 (d, *J* = 7.5 Hz, 2H), 6.80 (t, *J* = 7.5 Hz, 1H), 4.39 (q, *J* = 6.8 Hz, 1H), 3.21 (s, 1H), 2.15 (s, 6H), 1.55 (d, *J* = 6.8 Hz, 3H); <sup>13</sup>C NMR (176 MHz, CDCl<sub>3</sub>): δ 152.8, 146.9, 144.3, 129.3, 129.1, 127.0, 123.7, 122.1, 56.5, 23.0, 19.0.

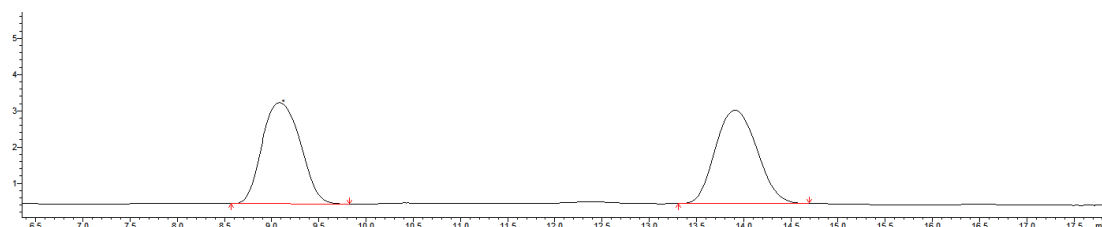

| Peak# | Ret. Time | Area   | Height | Conc.   | Name | Area%   |
|-------|-----------|--------|--------|---------|------|---------|
| 1     | 9.087     | 79376  | 2792   | 50.121  |      | 50.121  |
| 2     | 13.906    | 78992  | 2575   | 49.879  |      | 49.879  |
| Total |           | 158368 | 5367   | 100.000 |      | 100.000 |

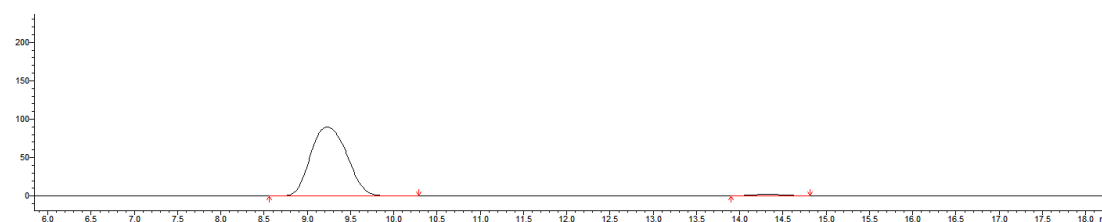

| Peak# | Ret. Time | Area    | Height | Conc.   | Name | Area%   |
|-------|-----------|---------|--------|---------|------|---------|
| 1     | 9.229     | 2629337 | 89858  | 97.912  |      | 97.912  |
| 2     | 14.317    | 56080   | 1942   | 2.088   |      | 2.088   |
| Total |           | 2685416 | 91800  | 100.000 |      | 100.000 |

**(S)-N-(1-(4-fluorophenyl)ethyl)-2,6-dimethylbenzenamine 5d.** 47.3 mg (97% yield) of **5d** was

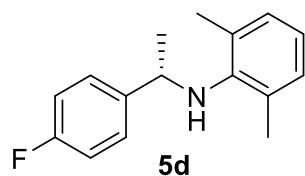

obtained as a colorless oil after purification with column chromatography on silica gel (hexanes/EtOAc, 20/1). 99% ee was determined by chiral HPLC (chiralcel OJ-H, *n*-hexane/*i*-PrOH = 99.9/0.1, flow rate = 0.5 mL/min, I =

254 nm, T = 40 °C):  $t_R$  = 12.2 min (major), 11.7 min (minor).  $[\alpha]_D^{25} = -135.6$  ( $c$  1.0,  $\text{CHCl}_3$ ).  $^1\text{H}$  NMR (400 MHz,  $\text{CDCl}_3$ ):  $\delta$  7.28 – 7.17 (m, 2H), 7.01 – 6.92 (m, 4H), 6.78 (t,  $J$  = 7.5 Hz, 1H), 4.28 (q,  $J$  = 6.7 Hz, 1H), 3.02 (s, 1H), 2.15 (s, 6H), 1.49 (d,  $J$  = 6.8 Hz, 3H);  $^{13}\text{C}$  NMR (101 MHz,  $\text{CDCl}_3$ ):  $\delta$  161.9 (d,  $J$  = 244.8 Hz), 144.7, 141.1 (d,  $J$  = 3.2 Hz), 129.5, 128.9, 127.7 (d,  $J$  = 7.9 Hz), 121.8, 115.2 (d,  $J$  = 21.1 Hz), 56.1, 22.7, 18.9;  $^{19}\text{F}$  NMR (376 MHz,  $\text{CDCl}_3$ ):  $\delta$  -116.0. HRMS (ESI):  $m/z$  calcd for  $\text{C}_{16}\text{H}_{18}\text{FN}$   $[\text{M}+\text{H}]^+$ : 244.1496, found: 244.1495.

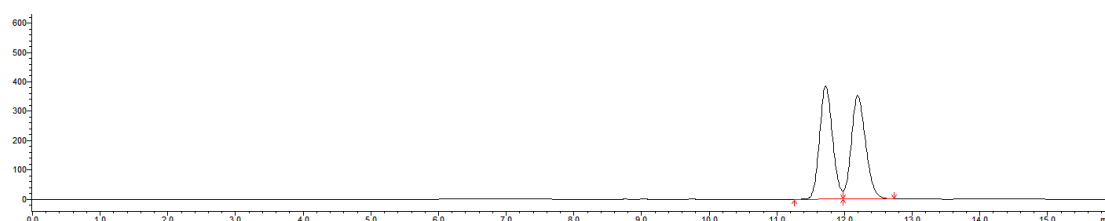

| Peak# | Ret. Time | Area     | Height | Conc.   | Name | Area%   |
|-------|-----------|----------|--------|---------|------|---------|
| 1     | 11.721    | 5147288  | 385003 | 49.735  |      | 49.735  |
| 2     | 12.195    | 5202052  | 352512 | 50.265  |      | 50.265  |
| Total |           | 10349341 | 737515 | 100.000 |      | 100.000 |

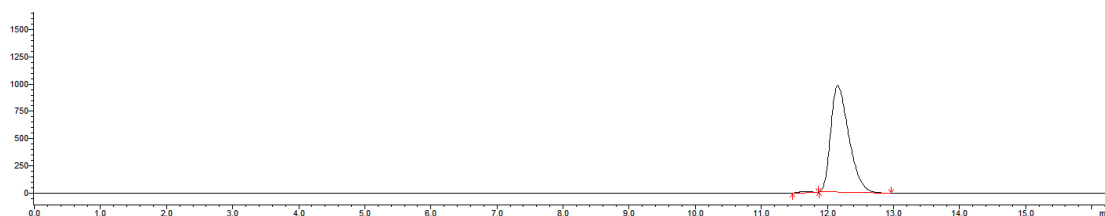

| Peak# | Ret. Time | Area     | Height | Conc.   | Name | Area%   |
|-------|-----------|----------|--------|---------|------|---------|
| 1     | 11.677    | 131482   | 11705  | 0.703   |      | 0.703   |
| 2     | 12.156    | 18574258 | 976994 | 99.297  |      | 99.297  |
| Total |           | 18705739 | 988698 | 100.000 |      | 100.000 |

**(S)-N-[1-(4-chlorophenyl)ethyl]-2,6-dimethylbenzenamine 5e.**<sup>1</sup> 51.5 mg (>99% yield) of **5e** was

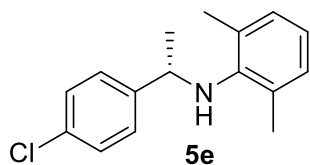

obtained as a colorless oil after purification with column chromatography on silica gel (hexanes/EtOAc, 20/1). 98% ee was determined by chiral HPLC (chiralcel OJ-H, *n*-hexane/*i*-PrOH = 99.8/0.2, flow rate = 0.8 mL/min,

$I = 254$  nm,  $T = 40$  °C):  $t_R = 10.0$  min (major), 9.3 min (minor).  $[\alpha]_D^{25} = -199.5$  ( $c$  1.0,  $\text{CHCl}_3$ ).  $^1\text{H}$  NMR (400 MHz,  $\text{CDCl}_3$ ):  $\delta$  7.31 – 7.13 (m, 4H), 6.94 (d,  $J = 7.5$  Hz, 2H), 6.83 – 6.73 (m, 1H), 4.27 (q,  $J = 6.7$  Hz, 1H), 3.07 (s, 1H), 2.15 (s, 6H), 1.48 (d,  $J = 6.8$  Hz, 3H);  $^{13}\text{C}$  NMR (101 MHz,  $\text{CDCl}_3$ ):  $\delta$  144.7, 143.8, 132.6, 129.4, 129.0, 128.5, 127.6, 121.8, 56.2, 22.8, 19.0.

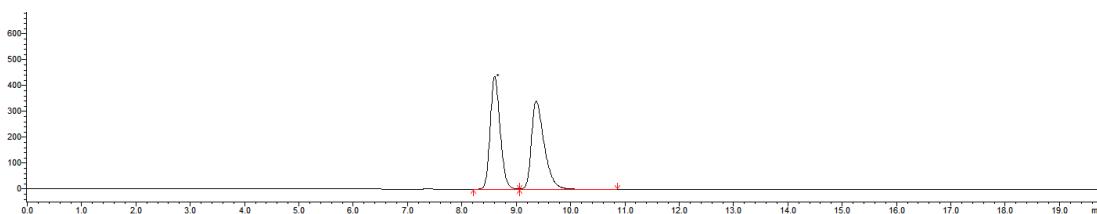

| Peak# | Ret. Time | Area     | Height | Conc.   | Name | Area%   |
|-------|-----------|----------|--------|---------|------|---------|
| 1     | 8.602     | 5564403  | 436047 | 49.829  |      | 49.829  |
| 2     | 9.368     | 5602627  | 340464 | 50.171  |      | 50.171  |
| Total |           | 11167030 | 776512 | 100.000 |      | 100.000 |

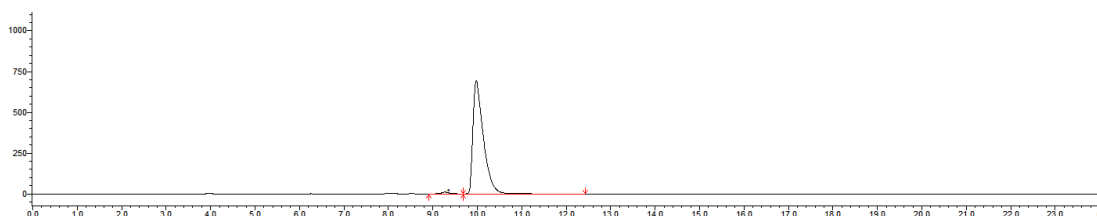

| Peak# | Ret. Time | Area     | Height | Conc.   | Name | Area%   |
|-------|-----------|----------|--------|---------|------|---------|
| 1     | 9.272     | 123082   | 10234  | 1.082   |      | 1.082   |
| 2     | 9.976     | 11257441 | 692349 | 98.918  |      | 98.918  |
| Total |           | 11380523 | 702582 | 100.000 |      | 100.000 |

**(S)-N-[1-(4-bromophenyl)ethyl]-2,6-dimethylbenzenamine 5f.**<sup>1</sup> 58.9 mg (97% yield) of **5f** was

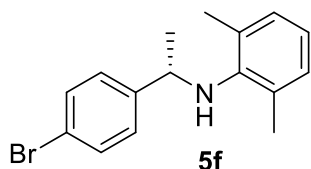

obtained as a colorless oil after purification with column chromatography on silica gel (hexanes/EtOAc, 20/1). 96% ee was determined by chiral

HPLC (chiralcel OJ-H, *n*-hexane/*i*-PrOH = 99.5/0.5, flow rate = 0.3 mL/min,

*I* = 254 nm, *T* = 40 °C): *t<sub>R</sub>* = 25.0 min (major), 23.7 min (minor). [ $\alpha$ ]<sub>D</sub><sup>25</sup> = −143.8 (*c* 1.0, CHCl<sub>3</sub>). <sup>1</sup>H

NMR (400 MHz, CDCl<sub>3</sub>):  $\delta$  7.45 – 7.32 (m, 2H), 7.21 – 7.11 (m, 2H), 6.94 (d, *J* = 7.5 Hz, 2H), 6.78 (dd, *J* = 13.1, 5.6 Hz, 1H), 4.26 (q, *J* = 6.7 Hz, 1H), 3.06 (s, 1H), 2.15 (s, 6H), 1.48 (d, *J* = 6.8 Hz, 3H);

<sup>13</sup>C NMR (101 MHz, CDCl<sub>3</sub>):  $\delta$  144.7, 144.3, 131.5, 129.4, 128.9, 127.9, 121.8, 120.7, 56.3, 22.8, 18.9.

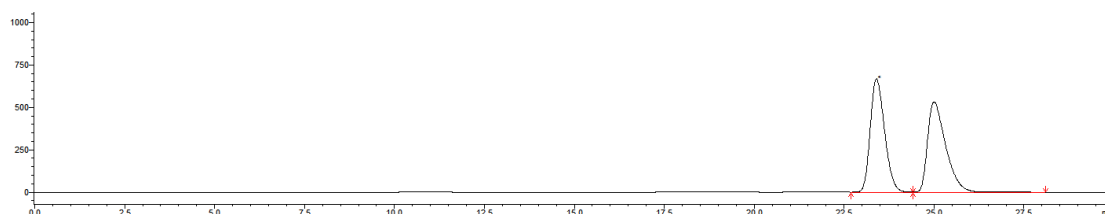

| Peak# | Ret. Time | Area     | Height  | Conc.   | Name | Area%   |
|-------|-----------|----------|---------|---------|------|---------|
| 1     | 23.400    | 18586379 | 668296  | 49.896  |      | 49.896  |
| 2     | 25.002    | 18663662 | 533104  | 50.104  |      | 50.104  |
| Total |           | 37250040 | 1201400 | 100.000 |      | 100.000 |

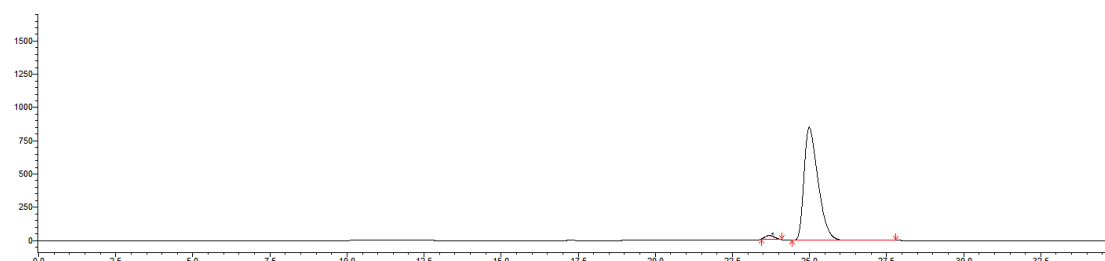

| Peak# | Ret. Time | Area     | Height | Conc.   | Name | Area%   |
|-------|-----------|----------|--------|---------|------|---------|
| 1     | 23.698    | 597817   | 28023  | 2.163   |      | 2.163   |
| 2     | 24.993    | 27044199 | 851566 | 97.837  |      | 97.837  |
| Total |           | 27642016 | 879589 | 100.000 |      | 100.000 |

**(S)-N-[1-(3-methoxyphenyl)ethyl]-2,6-dimethylbenzenamine 5g.**<sup>1</sup> 49.9 mg (98% yield) of **5g** was

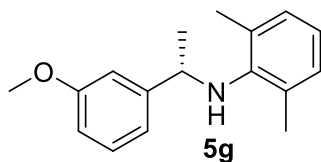

obtained as a colorless oil after purification with column chromatography on silica gel (hexanes/EtOAc, 10/1). 99% ee was determined by chiral

HPLC (chiralpak AD-H, *n*-hexane/*i*-PrOH = 99.5/0.5, flow rate = 1.0

mL/min, *I* = 254 nm, *T* = 40 °C): *t<sub>R</sub>* = 8.5 min (major), 7.5 min (minor). [ $\alpha$ ]<sub>D</sub><sup>25</sup> = −126.7 (*c* 1.0, CHCl<sub>3</sub>).

<sup>1</sup>H NMR (400 MHz, CDCl<sub>3</sub>):  $\delta$  7.23 – 7.04 (m, 1H), 6.90 – 6.78 (m, 3H), 6.77 – 6.64 (m, 3H), 4.20 (q, *J* = 6.7 Hz, 1H), 3.65 (d, *J* = 0.5 Hz, 3H), 2.97 (s, *J* = 7.3 Hz, 1H), 2.09 (s, 6H), 1.41 (dd, *J* = 6.7, 1.1 Hz, 3H);

<sup>13</sup>C NMR (101 MHz, CDCl<sub>3</sub>):  $\delta$  144.68, 143.83, 132.62, 129.41, 128.95, 128.53, 127.55, 121.83, 56.20, 22.78, 18.95.

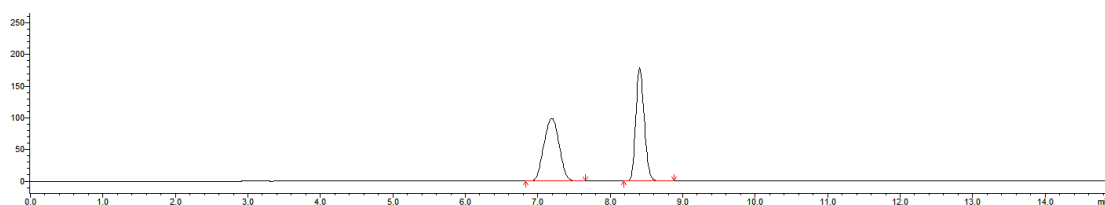

| Peak# | Ret. Time | Area    | Height | Conc.   | Name | Area%   |
|-------|-----------|---------|--------|---------|------|---------|
| 1     | 7.196     | 1455522 | 98983  | 50.076  |      | 50.076  |
| 2     | 8.405     | 1451095 | 178485 | 49.924  |      | 49.924  |
| Total |           | 2906617 | 277468 | 100.000 |      | 100.000 |

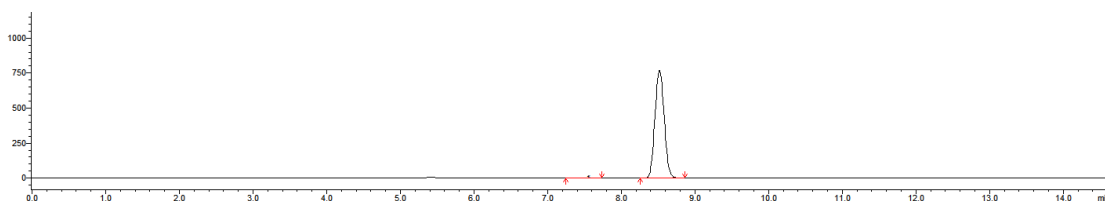

| Peak# | Ret. Time | Area    | Height | Conc.   | Name | Area%   |
|-------|-----------|---------|--------|---------|------|---------|
| 1     | 7.511     | 47045   | 2764   | 0.696   |      | 0.696   |
| 2     | 8.518     | 6712983 | 770892 | 99.304  |      | 99.304  |
| Total |           | 6760028 | 773655 | 100.000 |      | 100.000 |

(*S*)-*N*-[1-(3-nitrophenyl)ethyl]-2,6-dimethylbenzenamine **5h**.<sup>1</sup> 53.2 mg (98% yield) of **5h** was

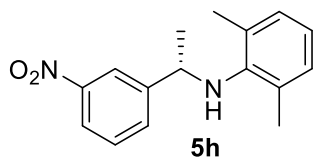

obtained as a yellow oil after purification with column chromatography on silica gel (hexanes/EtOAc, 10/1). >99% ee was determined by chiral HPLC (chiralcel OD-H, *n*-hexane/*i*-PrOH = 95/5, flow rate = 1.0 mL/min, I = 254

nm, T = 40 °C):  $t_R$  = 7.2 min (major), 8.6 min (minor).  $[\alpha]_D^{25} = -187.5$  ( $c$  1.0, CHCl<sub>3</sub>). <sup>1</sup>H NMR (400 MHz, CDCl<sub>3</sub>):  $\delta$  8.23 (t,  $J$  = 1.9 Hz, 1H), 8.08 (ddd,  $J$  = 8.2, 2.2, 1.0 Hz, 1H), 7.62 (t,  $J$  = 9.8 Hz, 1H), 7.44 (t,  $J$  = 7.9 Hz, 1H), 6.95 (d,  $J$  = 7.5 Hz, 2H), 6.85 – 6.76 (m, 1H), 4.41 (q,  $J$  = 6.7 Hz, 1H), 3.22 (s, 1H), 2.17 (s, 6H), 1.56 (d,  $J$  = 6.8 Hz, 3H); <sup>13</sup>C NMR (101 MHz, CDCl<sub>3</sub>):  $\delta$  148.4, 147.5, 144.3, 132.6, 129.4, 129.3, 129.1, 122.2, 122.0, 121.0, 56.3, 23.0, 19.0.

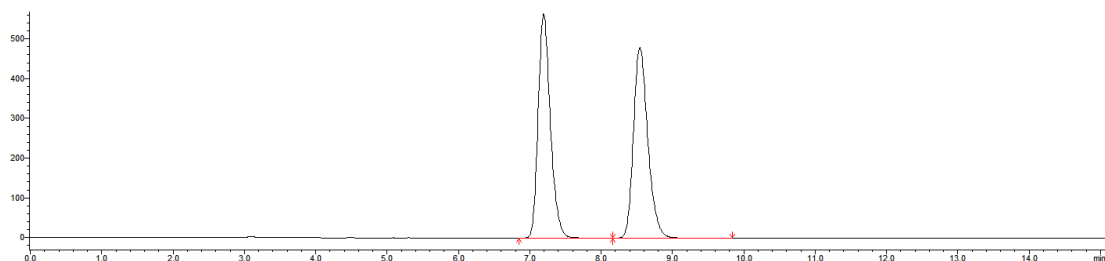

| 峰号 | 保留时间  | 面积       | 高度      | 浓度      | 化合物名 | 面积%     |
|----|-------|----------|---------|---------|------|---------|
| 1  | 7.194 | 6689803  | 563716  | 50.008  |      | 50.008  |
| 2  | 8.544 | 6687668  | 479163  | 49.992  |      | 49.992  |
| 总  |       | 13377471 | 1042879 | 100.000 |      | 100.000 |

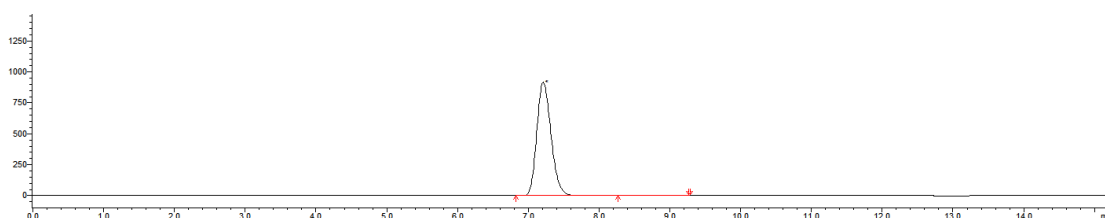

| Peak# | Ret. Time | Area     | Height | Conc.   | Name | Area%   |
|-------|-----------|----------|--------|---------|------|---------|
| 1     | 7.211     | 12832892 | 915664 | 99.769  |      | 99.769  |
| 2     | 8.567     | 29703    | 1826   | 0.231   |      | 0.231   |
| Total |           | 12862595 | 917490 | 100.000 |      | 100.000 |

**(S)-N-[1-(6-Methoxynaphthalen-2-yl)ethyl]-2,6-dimethylbenzenamine 5i.** 60.4 mg (98% yield) of

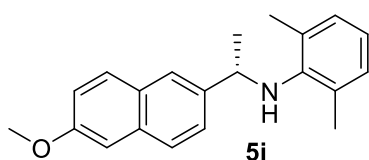

**5i** was obtained as a slight yellowish oil after purification with column chromatography on silica gel (hexanes/EtOAc, 20/1). 98% ee was determined by chiral HPLC (chiralcel OJ-H, *n*-hexane/*i*-PrOH = 90/10,

flow rate = 1.0 mL/min,  $\lambda = 254$  nm,  $T = 40$  °C):  $t_R = 12.5$  min (major), 11.1 min (minor).  $[\alpha]_D^{25} = -201.0$  ( $c$  1.0,  $\text{CHCl}_3$ ).  $^1\text{H}$  NMR (400 MHz,  $\text{CDCl}_3$ ):  $\delta$  7.66 (dd,  $J = 8.7, 2.7$  Hz, 3H), 7.41 (d,  $J = 8.4$  Hz, 1H), 7.16 – 7.05 (m, 2H), 6.93 (d,  $J = 7.4$  Hz, 2H), 6.84 – 6.70 (m, 1H), 4.44 (q,  $J = 6.6$  Hz, 1H), 3.86 (s, 3H), 3.29 – 2.92 (s, 1H), 2.18 (d,  $J = 2.9$  Hz, 6H), 1.56 (dd,  $J = 6.7, 2.8$  Hz, 3H);  $^{13}\text{C}$  NMR (101 MHz,  $\text{CDCl}_3$ ):  $\delta$  157.6, 145.1, 140.6, 133.8, 129.4, 128.9, 128.9, 127.0, 125.4, 124.4, 121.6, 118.9, 105.7, 56.8, 55.3, 22.9, 19.1.

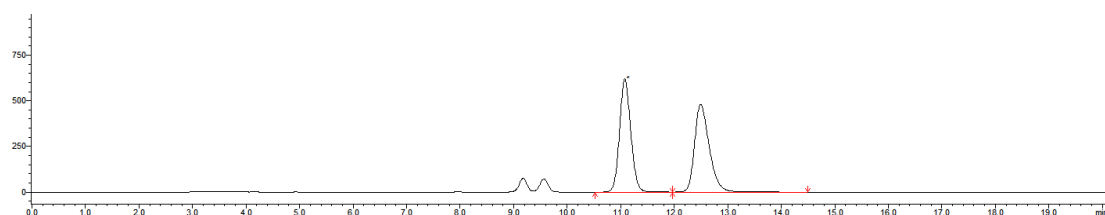

| Peak# | Ret. Time | Area     | Height  | Conc.   | Name | Area%   |
|-------|-----------|----------|---------|---------|------|---------|
| 1     | 11.075    | 9108376  | 619278  | 49.861  |      | 49.861  |
| 2     | 12.494    | 9159028  | 480996  | 50.139  |      | 50.139  |
| Total |           | 18267404 | 1100274 | 100.000 |      | 100.000 |

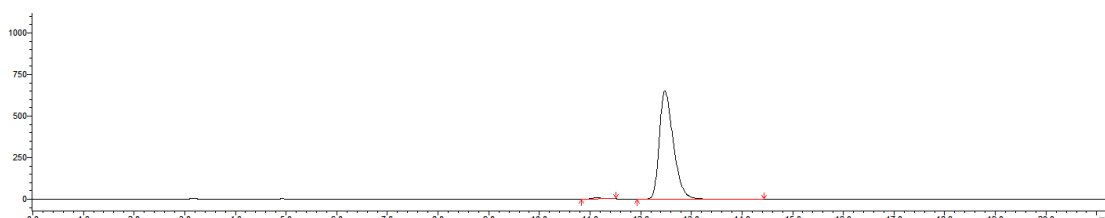

| Peak# | Ret. Time | Area     | Height | Conc.   | Name | Area%   |
|-------|-----------|----------|--------|---------|------|---------|
| 1     | 11.134    | 129236   | 7904   | 1.015   |      | 1.015   |
| 2     | 12.478    | 12602725 | 653454 | 98.985  |      | 98.985  |
| Total |           | 12731961 | 661358 | 100.000 |      | 100.000 |

**(S)-N-(3-methylbutan-2-yl)-2,6-dimethylbenzenamine 5j.**<sup>1</sup> 37.2 mg (98% yield) of **5j** was obtained as

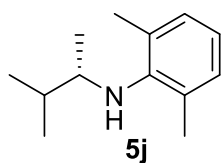

a colorless oil after purification with column chromatography on silica gel (hexanes/EtOAc, 20/1). 74% ee was determined by chiral GC (chiral  $\beta$ -DEX 120 column, column temp.: 100 °C, carrier gas: N<sub>2</sub>):  $t_R$  = 102.9 min (major), 112.8 min (minor).

$[\alpha]_D^{25} = -5.7$  (c 1.0, CHCl<sub>3</sub>). <sup>1</sup>H NMR (400 MHz, CDCl<sub>3</sub>):  $\delta$  6.89 (d,  $J$  = 7.5 Hz, 2H), 6.69 (t,  $J$  = 7.4 Hz, 1H), 3.10 (m,  $J$  = 6.5, 4.8 Hz, 1H), 2.42 (s, 1H), 2.18 (s, 6H), 1.81 – 1.59 (m, 1H), 1.01 – 0.81 (m, 9H); <sup>13</sup>C NMR (101 MHz, CDCl<sub>3</sub>):  $\delta$  145.3, 128.9, 128.6, 120.8, 57.0, 33.5, 19.5, 19.2, 17.6, 16.9.

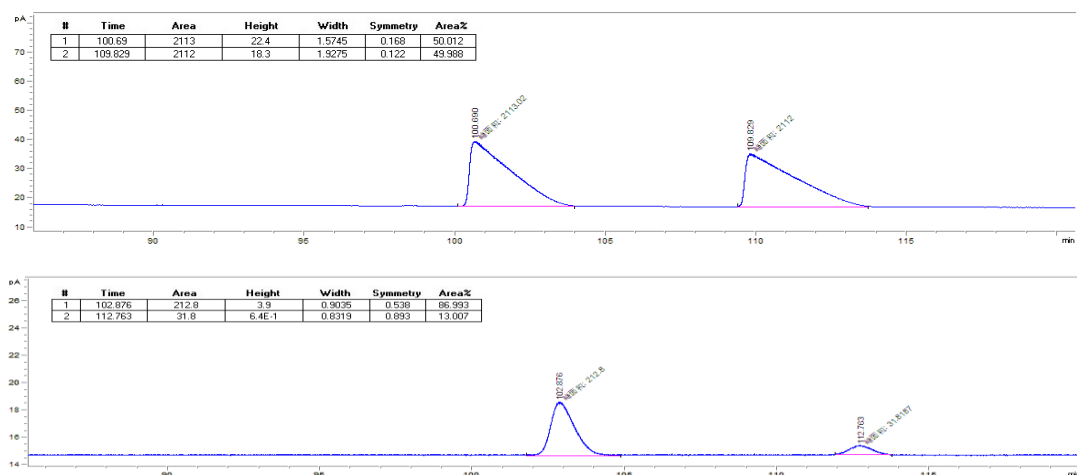

**(S)-methyl-2-(2,6-dimethylphenylamino)propanoate 5k.**<sup>1</sup> 60.4 mg (98% yield) of **5k** was obtained as

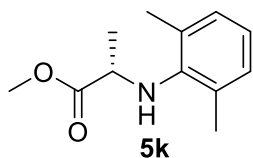

a slight yellowish oil after purification with column chromatography on silica gel (hexanes/EtOAc, 20/1). 91% ee was determined by chiral HPLC (chiralcel OJ-H, *n*-hexane/*i*-PrOH = 97/3, flow rate = 0.8 mL/min, I = 254 nm, T = 40 °C):  $t_R$  = 7.5 min (major), 6.8 min (minor).

$[\alpha]_D^{25} = -21.5$  (c 1.0, CHCl<sub>3</sub>). <sup>1</sup>H NMR (700 MHz, CDCl<sub>3</sub>):  $\delta$  6.96 (d,  $J$  = 7.5 Hz, 2H), 6.80 (t,  $J$  = 7.5 Hz, 1H), 4.06 – 3.92 (m, 1H), 3.76 (d,  $J$  = 5.0 Hz, 1H), 3.66 (s, 3H), 2.30 (s, 6H), 1.38 (d,  $J$  = 7.0 Hz, 3H); <sup>13</sup>C NMR (101 MHz, CDCl<sub>3</sub>):  $\delta$  144.7, 143.8, 132.6, 129.4, 129.0, 128.5, 127.6, 121.8, 56.2, 22.8, 19.0.

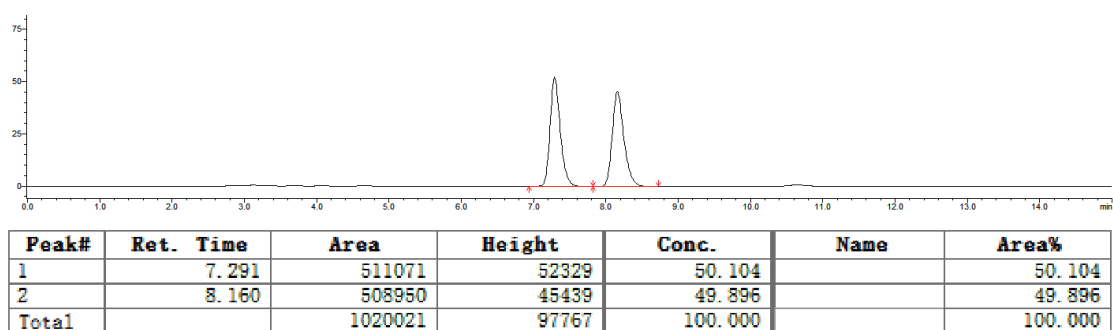

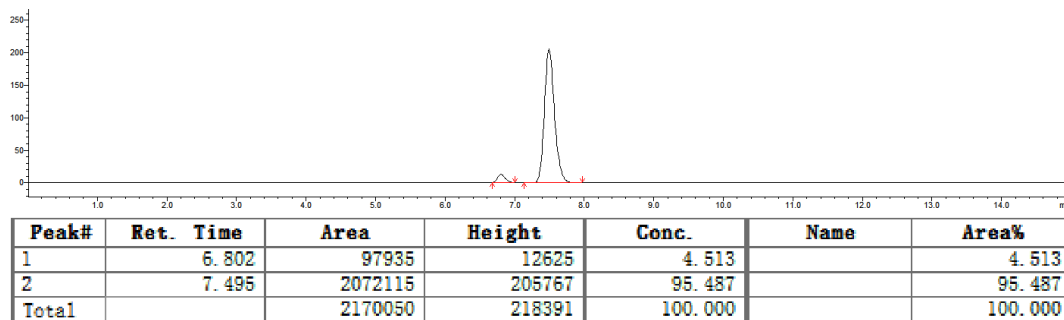

**(S)-N-(1-phenylethyl)-2-ethyl-6-methylbenzenamine 5l.**<sup>1</sup> 46.9 mg (99% yield) of **5l** was obtained as

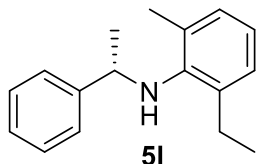

a colorless oil after purification with column chromatography on silica gel (hexanes/EtOAc, 20/1). 97% ee was determined by chiral HPLC (chiralcel OJ-H, *n*-hexane/*i*-PrOH = 96.4/0.6, flow rate = 1.0 mL/min, I = 254 nm, T = 40 °C):

$t_R$  = 10.9 min (major), 10.5 min (minor).  $[\alpha]_D^{25} = -78.4$  (*c* 1.0, CHCl<sub>3</sub>). <sup>1</sup>H NMR (400 MHz, CDCl<sub>3</sub>): δ 7.45 – 7.21 (m, 5H), 7.03 (dd, *J* = 14.1, 7.4 Hz, 2H), 6.90 (t, *J* = 7.5 Hz, 1H), 4.33 (q, *J* = 6.7 Hz, 1H), 3.24 (s, 1H), 2.57 (q, *J* = 7.5 Hz, 2H), 2.24 (s, 3H), 1.55 (d, *J* = 6.8 Hz, 3H), 1.22 (t, *J* = 7.6 Hz, 3H); <sup>13</sup>C NMR (101 MHz, CDCl<sub>3</sub>): δ 145.3, 144.4, 135.7, 130.0, 128.8, 128.5, 127.0, 126.6, 126.2, 122.0, 57.4, 24.4, 22.6, 19.2, 14.6.

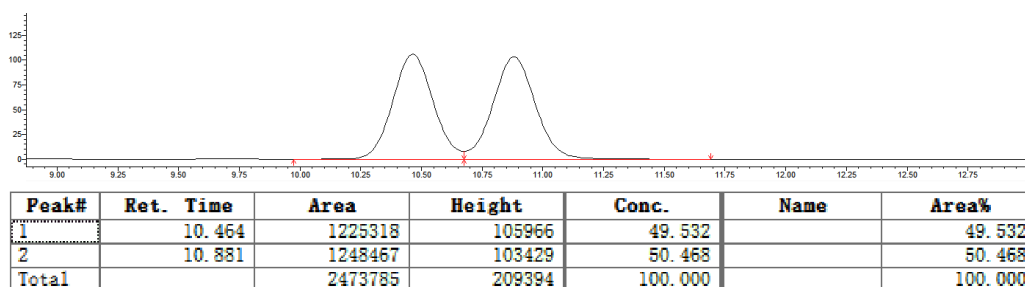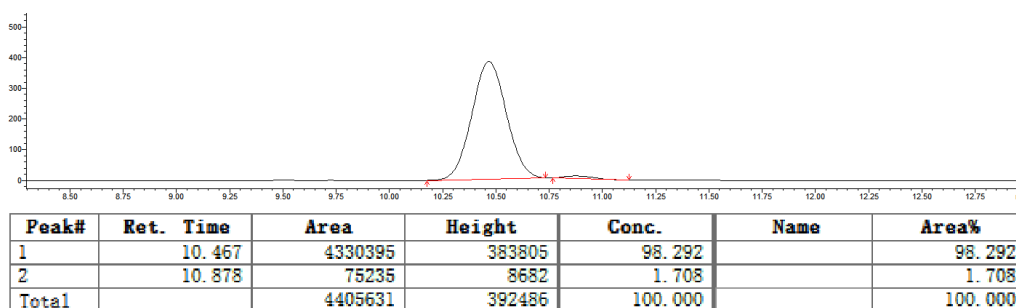

**(S)-N-(1-methoxypropan-2-yl)-2-ethyl-6-methylbenzenamine 5m.**<sup>1</sup> 40.8 mg (98% yield) of **5m** was

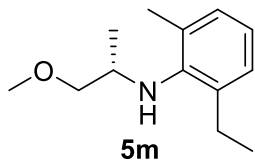

obtained as a colorless oil after purification with column chromatography on silica gel (hexanes/EtOAc, 20/1). 90% ee was determined by chiral HPLC (chiralcel OD-H, *n*-hexane/*i*-PrOH = 100/0, flow rate = 1.0 mL/min, I = 254 nm, T = 40 °C):  $t_R$  = 15.2 min (major), 10.6 min (minor).  $[\alpha]_D^{25} = +10.3$  (*c* 1.0, CHCl<sub>3</sub>). <sup>1</sup>H NMR (400

MHz, CDCl<sub>3</sub>):  $\delta$  7.11 – 6.97 (m, 2H), 6.88 (t,  $J$  = 7.5 Hz, 1H), 3.36 (m, 7H), 2.67 (q,  $J$  = 7.5 Hz, 2H), 2.30 (s, 3H), 1.33 – 1.10 (m, 6H); <sup>13</sup>C NMR (101 MHz, CDCl<sub>3</sub>):  $\delta$  144.3, 135.5, 129.9, 128.7, 126.5, 121.8, 59.1, 52.9, 24.3, 18.9, 18.5, 14.6.

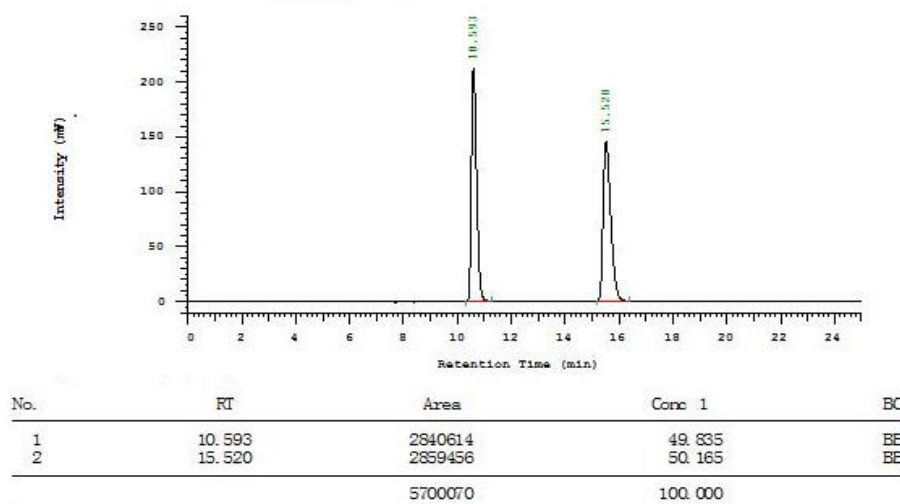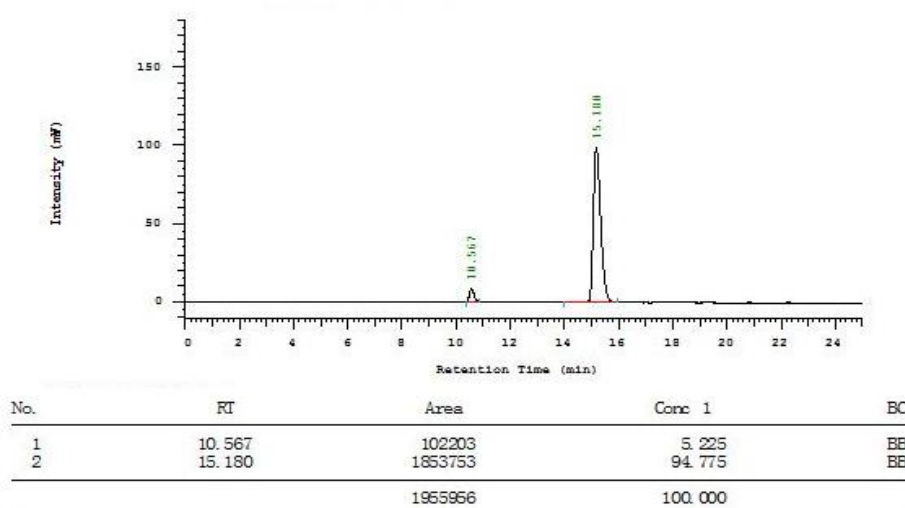

**(S)-N-(1-phenylethyl)benzenamine 7a.**<sup>3</sup> 39.1 mg (99% yield) of **7a** was obtained as a slight yellowish

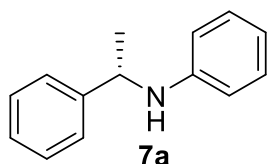

oil after purification with column chromatography on silica gel (hexanes/EtOAc, 20/1). 96% ee was determined by chiral HPLC (chiralcel OJ-H, *n*-hexane/*i*-PrOH = 97/3, flow rate = 1.0 mL/min, I = 254 nm, T = 40 °C):

$t_R$  = 18.4 min (major), 16.6 min (minor).  $[\alpha]_D^{25}$  = +13.6 ( $c$  1.0, MeOH). <sup>1</sup>H NMR (400 MHz, CDCl<sub>3</sub>):  $\delta$  7.37 – 7.28 (m, 4H), 7.21 – 7.18 (m, 1H), 7.11 – 7.04 (m, 2H), 6.67 – 6.59 (m, 1H), 6.49 (dt,  $J$  = 8.9, 1.7 Hz, 2H), 4.47 (q,  $J$  = 6.7 Hz, 1H), 4.00 (s, 1H), 1.49 (d,  $J$  = 6.7 Hz, 3H); <sup>13</sup>C NMR (176 MHz, CDCl<sub>3</sub>):  $\delta$  147.4, 145.3, 129.2, 128.7, 126.9, 125.9, 117.3, 113.4, 53.5, 25.1.

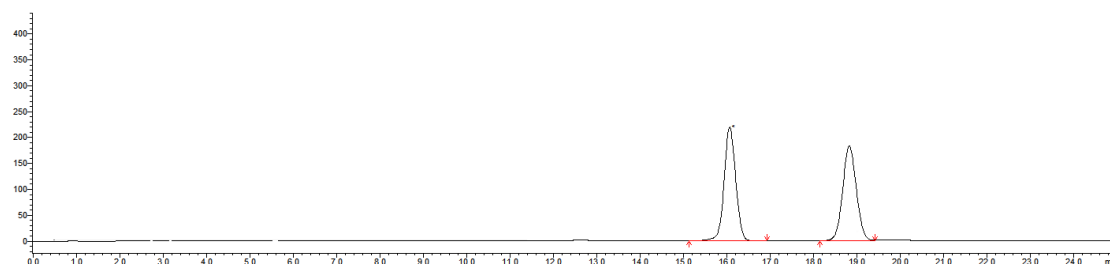

| Peak# | Ret. Time | Area    | Height | Conc.   | Name | Area%   |
|-------|-----------|---------|--------|---------|------|---------|
| 1     | 16.064    | 4063280 | 218960 | 50.346  |      | 50.346  |
| 2     | 18.823    | 4007360 | 183000 | 49.654  |      | 49.654  |
| Total |           | 8070641 | 401960 | 100.000 |      | 100.000 |

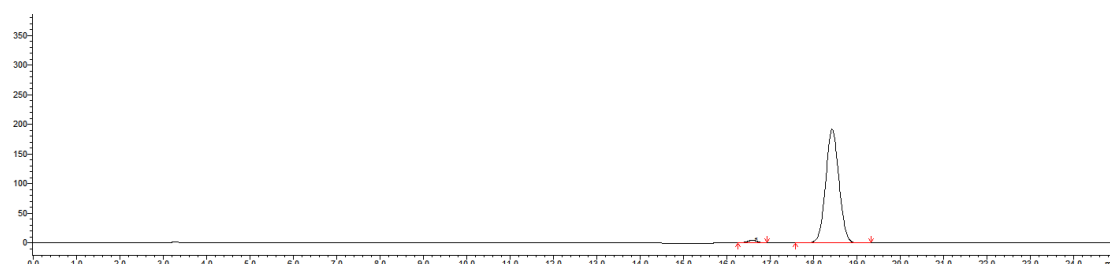

| Peak# | Ret. Time | Area    | Height | Conc.   | Name | Area%   |
|-------|-----------|---------|--------|---------|------|---------|
| 1     | 16.582    | 75162   | 4586   | 1.801   |      | 1.801   |
| 2     | 18.427    | 4097146 | 192003 | 98.199  |      | 98.199  |
| Total |           | 4172308 | 196590 | 100.000 |      | 100.000 |

(*S*)-*N*-(1-(4-methoxyphenyl)ethyl)benzenamine **7b**.<sup>3</sup> 44.6 mg (98% yield) of **7b** was obtained as a

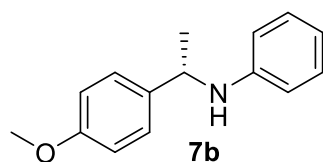

slight yellowish oil after purification with column chromatography on silica gel (hexanes/EtOAc, 20/1). 96% ee was determined by chiral HPLC (chiralcel OJ-H, *n*-hexane/*i*-PrOH = 85/15, flow rate = 1.0 mL/min, I =

254 nm, T = 40 °C):  $t_R$  = 14.8 min (major), 13.0 min (minor).  $[\alpha]_D^{25} = -8.2$  ( $c$  1.0, CHCl<sub>3</sub>). <sup>1</sup>H NMR (400 MHz, CDCl<sub>3</sub>):  $\delta$  7.26 (t,  $J$  = 5.7 Hz, 2H), 7.10 – 7.03 (m, 2H), 6.89 – 6.80 (m, 2H), 6.63 (td,  $J$  = 7.3, 1.0 Hz, 1H), 6.53 – 6.48 (m, 2H), 4.43 (q,  $J$  = 6.7 Hz, 1H), 3.97 (s, 1H), 3.76 (s, 3H), 1.47 (d,  $J$  = 6.7 Hz, 3H); <sup>13</sup>C NMR (101 MHz, CDCl<sub>3</sub>):  $\delta$  158.5, 147.4, 137.3, 129.2, 127.0, 117.2, 114.1, 113.4, 55.3, 52.9, 25.1.

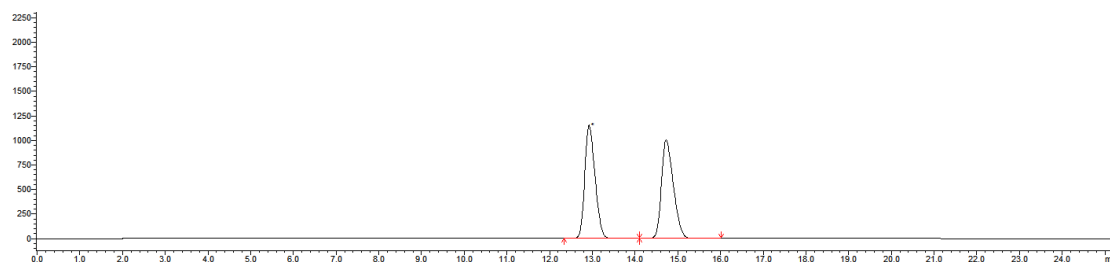

| Peak# | Ret. Time | Area     | Height  | Conc.   | Name | Area%   |
|-------|-----------|----------|---------|---------|------|---------|
| 1     | 12.923    | 19257694 | 1153784 | 49.792  |      | 49.792  |
| 2     | 14.728    | 19418652 | 1004007 | 50.208  |      | 50.208  |
| Total |           | 38676346 | 2157791 | 100.000 |      | 100.000 |

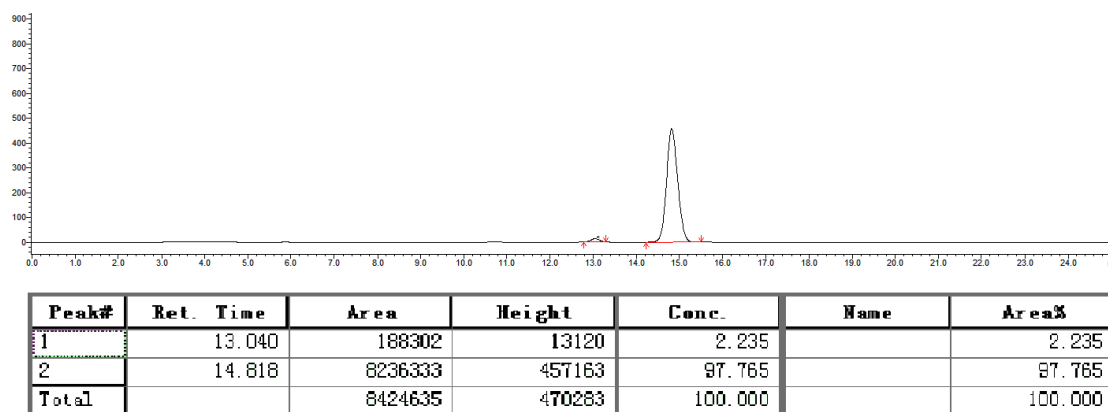

(*S*)-*N*-(1-(4-Nitrophenyl)ethyl)benzenamine **7c**.<sup>3</sup> 47.6 mg (98% yield) of **7c** was obtained as a yellow oil after purification with column chromatography on silica gel (hexanes/EtOAc, 10/1). 96% ee was determined by chiral HPLC (chiralcel OJ-H, *n*-hexane/*i*-PrOH = 90/10, flow rate = 0.9 mL/min, I = 254 nm, T = 40 °C):  $t_R$  = 17.7 min (major), 19.1 min (minor).  $[\alpha]_D^{25} = -18.9$  ( $c$  1.0, CHCl<sub>3</sub>). <sup>1</sup>H NMR (400 MHz, CDCl<sub>3</sub>):  $\delta$  8.16 – 7.99 (m, 2H), 7.50 – 7.38 (m, 2H), 7.07 – 6.96 (m, 2H), 6.64 – 6.56 (m, 1H), 6.36 (dt,  $J$  = 3.2, 1.6 Hz, 2H), 4.47 (q,  $J$  = 6.8 Hz, 1H), 4.03 (s, 1H), 1.45 (d,  $J$  = 6.8 Hz, 3H); <sup>13</sup>C NMR (176 MHz, CDCl<sub>3</sub>):  $\delta$  147.0, 143.9, 132.5, 129.2, 128.9, 127.3, 117.6, 113.4, 53.0, 25.1.

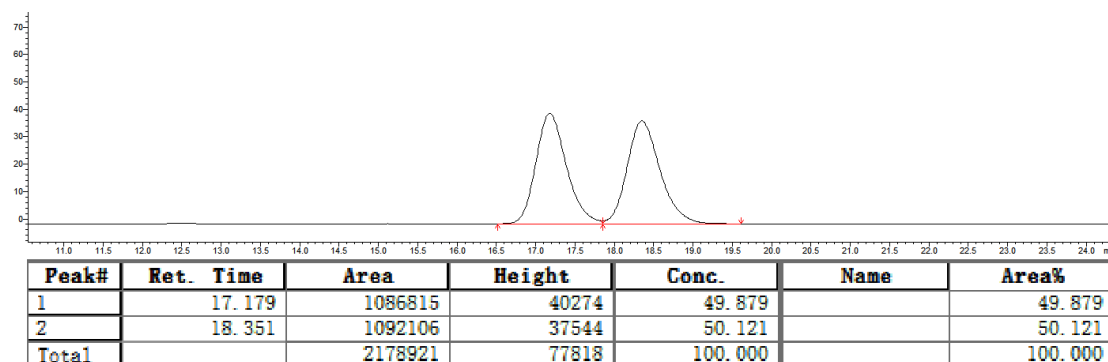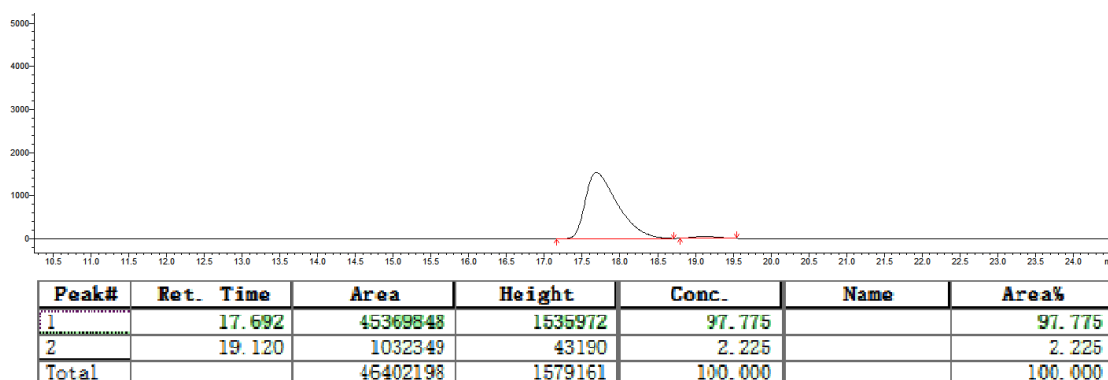

**(S)-N-(1-(4-fluorophenyl)ethyl)aniline 7d.**<sup>4</sup> 42.2 mg (98% yield) of **7d** was obtained as a colorless oil

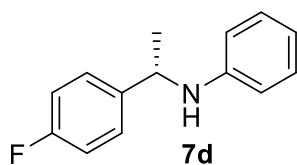

after purification with column chromatography on silica gel (hexanes/EtOAc, 20/1). 97% ee was determined by chiral HPLC (chiralcel OD-H, *n*-hexane/*i*-

PrOH = 95/5, flow rate = 0.8 mL/min, I = 254 nm, T = 40 °C):  $t_R$  = 8.6 min

(major), 9.7 min (minor).  $[\alpha]_D^{25}$  = +22.8 (*c* 1.0, CHCl<sub>3</sub>). <sup>1</sup>H NMR (400 MHz, CDCl<sub>3</sub>):  $\delta$  7.37 – 7.27 (m, 2H), 7.16 – 7.05 (m, 2H), 7.03 – 6.94 (m, 2H), 6.64 (td, *J* = 7.4, 0.9 Hz, 1H), 6.53 – 6.44 (m, 2H), 4.45 (q, *J* = 6.7 Hz, 1H), 3.92 (s, 1H), 1.47 (d, *J* = 6.7 Hz, 3H); <sup>13</sup>C NMR (101 MHz, CDCl<sub>3</sub>):  $\delta$  161.8 (d, *J*<sub>C-F</sub> = 244.3 Hz), 147.1, 140.9 (d, *J*<sub>C-F</sub> = 3.0 Hz), 129.2, 127.4 (d, *J*<sub>C-F</sub> = 8.0 Hz), 117.5, 115.5 (d, *J*<sub>C-F</sub> = 21.3 Hz), 113.4, 52.9, 25.2; <sup>19</sup>F NMR (376 MHz, CDCl<sub>3</sub>):  $\delta$  -116.3.

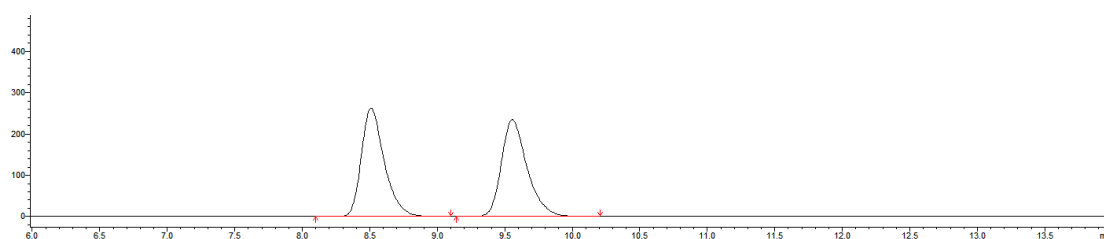

| Peak# | Ret. Time | Area    | Height | Conc.   | Name | Area%   |
|-------|-----------|---------|--------|---------|------|---------|
| 1     | 8.509     | 3079154 | 262548 | 49.904  |      | 49.904  |
| 2     | 9.556     | 3090952 | 234111 | 50.096  |      | 50.096  |
| Total |           | 6170106 | 496659 | 100.000 |      | 100.000 |

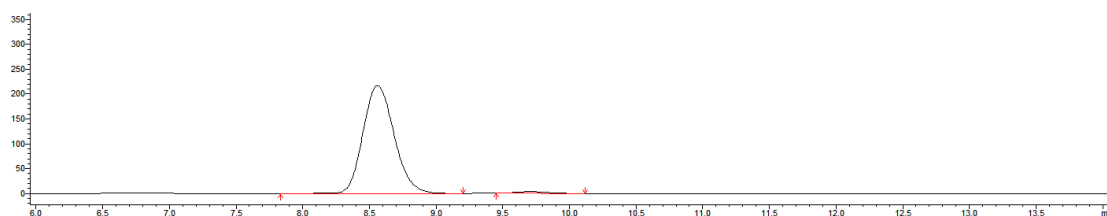

| Peak# | Ret. Time | Area    | Height | Conc.   | Name | Area%   |
|-------|-----------|---------|--------|---------|------|---------|
| 1     | 8.562     | 3538133 | 217181 | 98.457  |      | 98.457  |
| 2     | 9.706     | 55439   | 3383   | 1.543   |      | 1.543   |
| Total |           | 3593571 | 220564 | 100.000 |      | 100.000 |

**(S)-N-(1-(4-chlorophenyl)ethyl)benzenamine 7e.**<sup>3</sup> 45.9 mg (99% yield) of **7e** was obtained as a slight

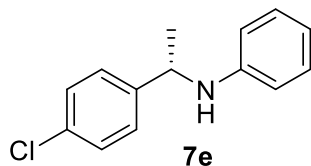

yellowish oil after purification with column chromatography on silica gel (hexanes/EtOAc, 20/1). 96% ee was determined by chiral HPLC (chiralcel

OD-H, *n*-hexane/*i*-PrOH = 95/5, flow rate = 1.0 mL/min, I = 254 nm, T =

40 °C):  $t_R$  = 7.5 min (major), 8.6 min (minor).  $[\alpha]_D^{25}$  = +25.5 (*c* 1.0, CH<sub>2</sub>Cl<sub>2</sub>). <sup>1</sup>H NMR (400 MHz, CDCl<sub>3</sub>):  $\delta$  7.34 – 7.24 (m, 4H), 7.13 – 7.02 (m, 2H), 6.74 – 6.62 (m, 1H), 6.46 (dd, *J* = 8.6, 0.9 Hz, 2H), 4.43 (q, *J* = 6.7 Hz, 1H), 3.98 (s, 1H), 1.47 (d, *J* = 6.7 Hz, 3H); <sup>13</sup>C NMR (176 MHz, CDCl<sub>3</sub>):  $\delta$  147.0, 143.9, 132.5, 129.2, 128.9, 127.3, 117.6, 113.4, 53.0, 25.1.

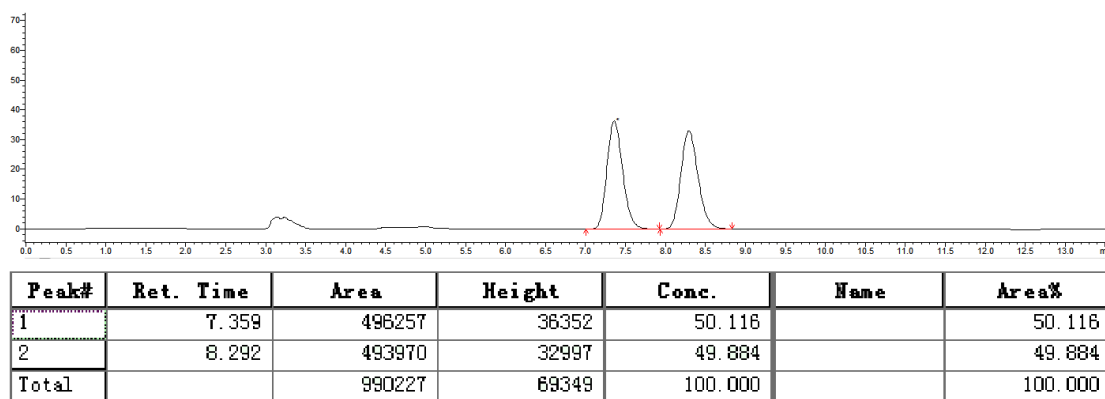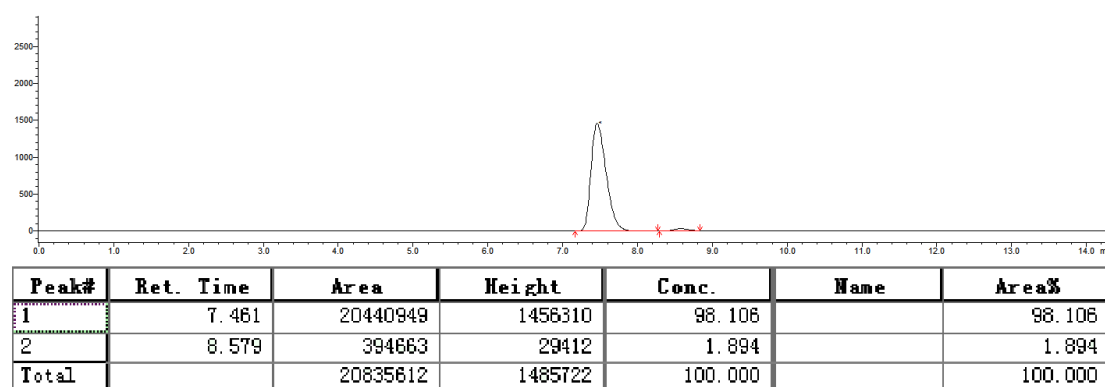

(*S*)-*N*-(1-(4-bromophenyl)ethyl)benzenamine **7f**.<sup>5</sup> 53.7 mg (97% yield) of **7f** was obtained as a light

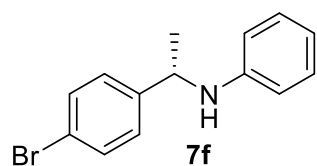

yellow solid after purification with column chromatography on silica gel

(hexanes/EtOAc, 20/1). 96% ee was determined by chiral HPLC (chiralcel

OD-H, *n*-hexane/*i*-PrOH = 95/5, flow rate = 1.0 mL/min,  $\lambda = 254$  nm,  $T =$

40 °C):  $t_R = 7.9$  min (major), 9.0 min (minor). M.p.: 62 – 64 °C;  $[\alpha]_D^{25} = -10.7$  ( $c$  1.0, CHCl<sub>3</sub>). <sup>1</sup>H

NMR (400 MHz, CDCl<sub>3</sub>):  $\delta$  7.41 (dd,  $J = 8.7, 2.1$  Hz, 2H), 7.27 – 7.20 (m, 2H), 7.11 – 7.03 (m, 2H),

6.65 (td,  $J = 7.4, 0.9$  Hz, 1H), 6.50 – 6.42 (m, 2H), 4.41 (q,  $J = 6.7$  Hz, 1H), 3.98 (s, 1H), 1.46 (d,  $J =$

6.7 Hz, 3H); <sup>13</sup>C NMR (176 MHz, CDCl<sub>3</sub>):  $\delta$  147.0, 143.9, 132.5, 129.2, 128.9, 127.3, 117.6, 113.4,

53.0, 25.1.

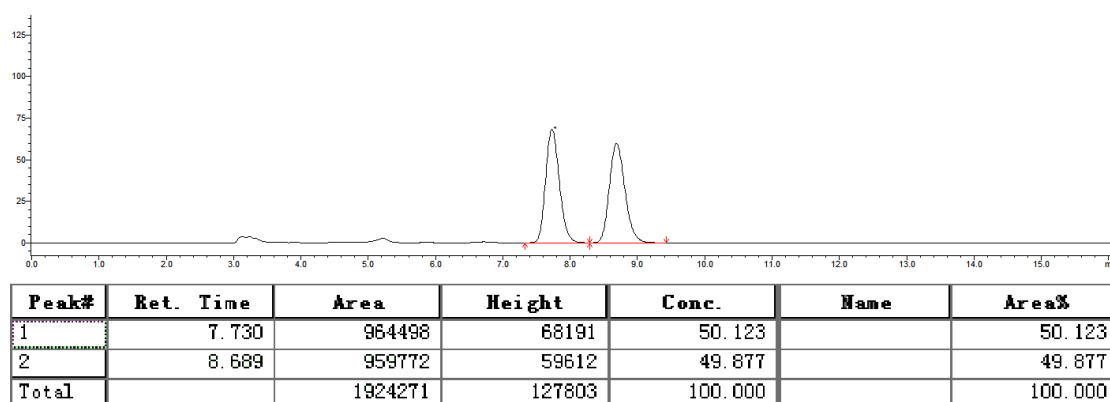

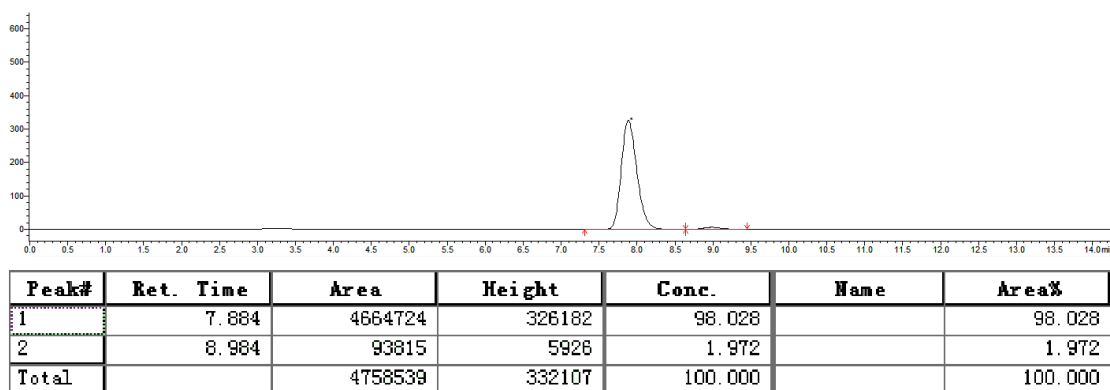

(*S*)-*N*-(1-(3-nitrophenyl)ethyl)benzenamine **7g**.<sup>3</sup> 47.9 mg (99% yield) of **7g** was obtained as a yellow

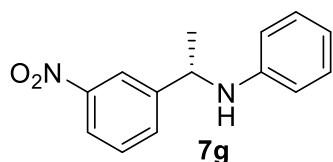

oil after purification with column chromatography on silica gel (hexanes/EtOAc, 10/1). 96% ee was determined by chiral HPLC (chiralcel OJ-H, *n*-hexane/*i*-PrOH = 75/25, flow rate = 1.0 mL/min, I = 254 nm, T

= 40 °C):  $t_R$  = 16.7 min (major), 13.8 min (minor).  $[\alpha]_D^{25}$  = +26.4 (*c* 1.0, CHCl<sub>3</sub>). <sup>1</sup>H NMR (400 MHz, CDCl<sub>3</sub>): δ 8.24 (t, *J* = 1.9 Hz, 1H), 8.07 (ddd, *J* = 8.2, 2.3, 1.0 Hz, 1H), 7.71 (d, *J* = 7.7 Hz, 1H), 7.46 (t, *J* = 7.9 Hz, 1H), 7.12 – 7.04 (m, 2H), 6.73 – 6.63 (m, 1H), 6.46 (dt, *J* = 3.2, 1.6 Hz, 2H), 4.56 (q, *J* = 6.7 Hz, 1H), 4.12 (s, 1H), 1.53 (d, *J* = 6.8 Hz, 3H); <sup>13</sup>C NMR (176 MHz, CDCl<sub>3</sub>): δ 147.0, 143.9, 132.5, 129.2, 128.9, 127.3, 117.6, 113.4, 53.0, 25.1.

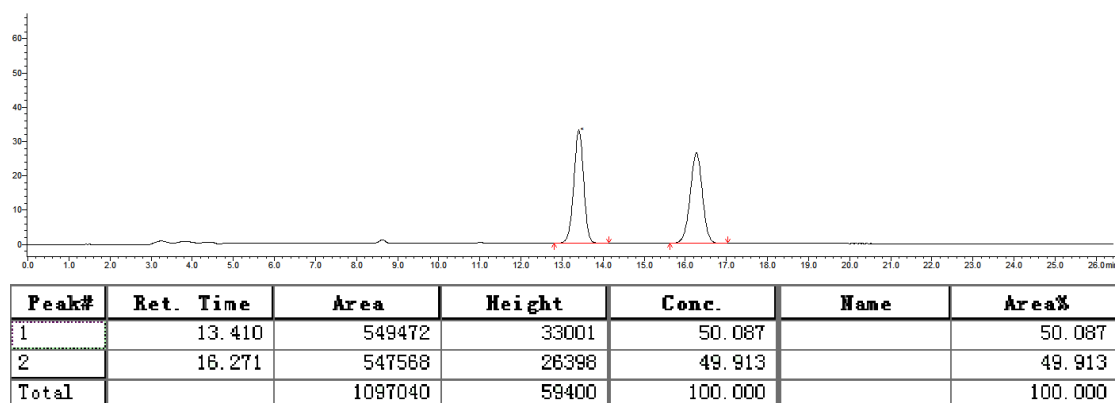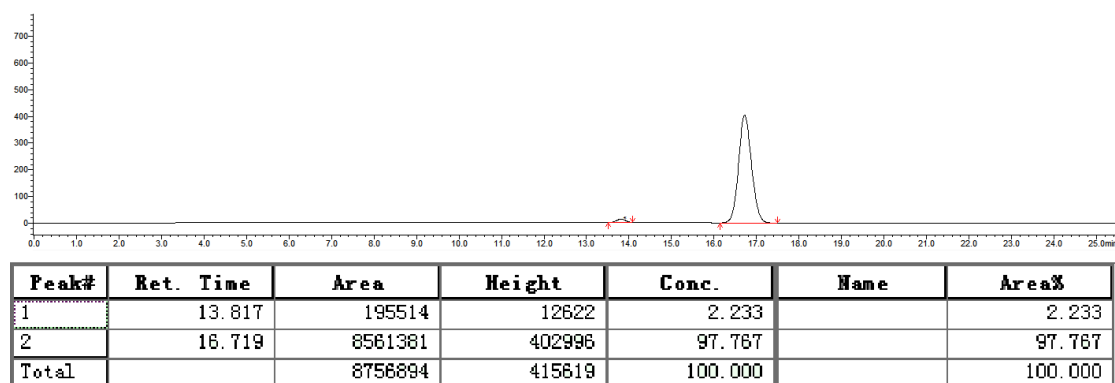

**(S)-N-(1-(6-methoxynaphthalen-2-yl)ethyl)benzenamine 7h.**<sup>3</sup> 54.8 mg (99% yield) of **7h** was

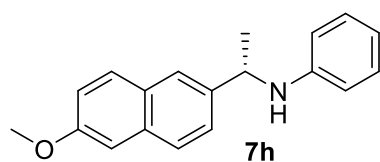

obtained as a white solid after purification with column chromatography on silica gel (hexanes/EtOAc, 20/1). 95% ee was determined by chiral HPLC (chiralcel OD-H, *n*-hexane/*i*-PrOH =

85/15, flow rate = 0.5 mL/min, I = 254 nm, T = 40 °C):  $t_R$  = 13.5 min (major), 15.5 min (minor). M.p.: 131 – 133 °C;  $[\alpha]_D^{25} = -20.6$  (*c* 1.0, CHCl<sub>3</sub>). <sup>1</sup>H NMR (400 MHz, DMSO-*d*<sup>6</sup>): δ 7.82 – 7.69 (m, 3H), 7.51 (d, *J* = 8.5 Hz, 1H), 7.24 (d, *J* = 2.1 Hz, 1H), 7.12 (dd, *J* = 8.9, 2.3 Hz, 1H), 6.97 (t, *J* = 7.7 Hz, 2H), 6.58 (d, *J* = 8.1 Hz, 2H), 6.45 (t, *J* = 7.2 Hz, 1H), 6.18 (d, *J* = 6.6 Hz, 1H), 4.57 (q, *J* = 6.5 Hz, 1H), 3.81 (s, 3H), 3.53 (s, 3H), 1.49 (d, *J* = 6.7 Hz, 3H); <sup>13</sup>C NMR (101 MHz, DMSO-*d*<sup>6</sup>): δ 157.4, 148.5, 141.8, 133.9, 129.5, 129.2, 129.0, 127.5, 125.6, 124.4, 119.0, 116.1, 113.4, 106.3, 55.6, 52.7, 25.1.

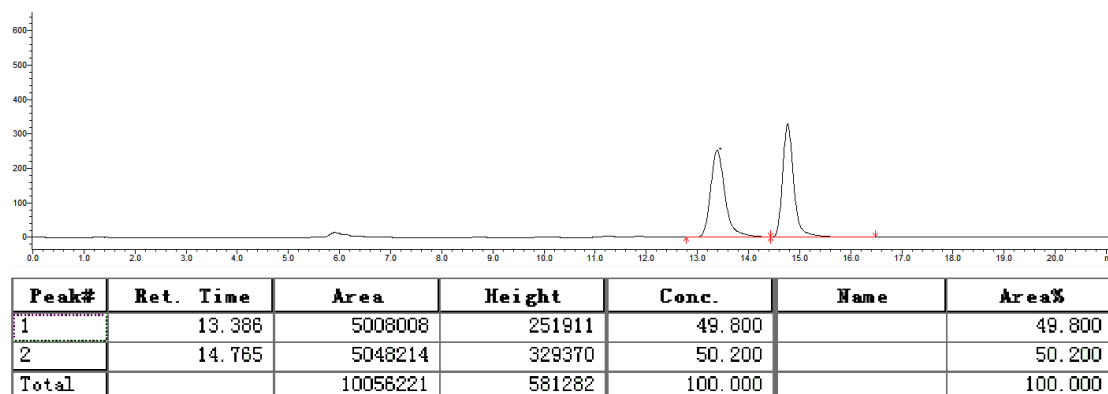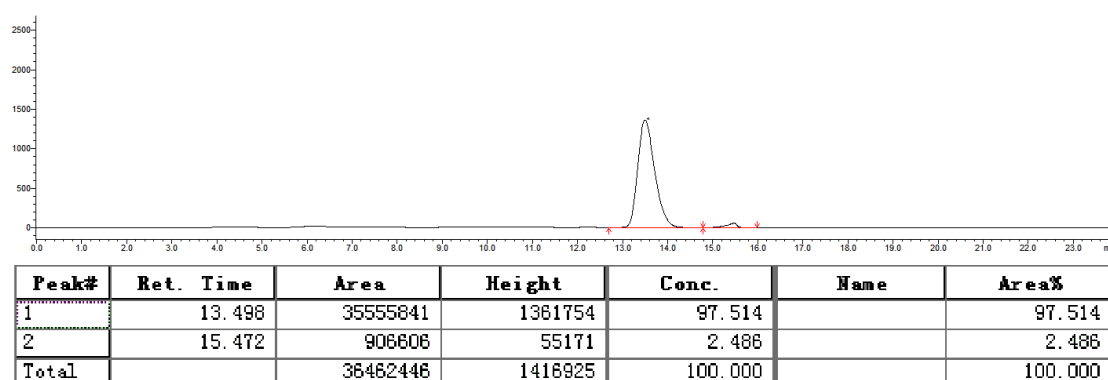

**(S)-N-(1-(thiophen-2-yl)ethyl)benzenamine 7i.**<sup>3</sup> 40.7 mg (>99% yield) of **7i** was obtained as a

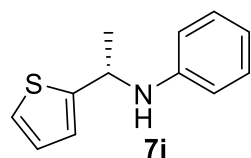

colorless oil after purification with column chromatography on silica gel (hexanes/EtOAc, 20/1). 98% ee was determined by chiral HPLC (chiralcel OD-H, *n*-hexane/*i*-PrOH = 99/1, flow rate = 1.0 mL/min, I = 254 nm, T = 40 °C):  $t_R$

= 10.2 min (major), 10.9 min (minor).  $[\alpha]_D^{25} = +4.4$  (*c* 1.0, CH<sub>3</sub>CN). <sup>1</sup>H NMR (400 MHz, CDCl<sub>3</sub>): δ

7.17 – 7.09 (m, 3H), 6.95 (dt,  $J = 3.3, 0.9$  Hz, 1H), 6.92 (dd,  $J = 5.0, 3.5$  Hz, 1H), 6.72 – 6.66 (m, 1H), 6.60 (dd,  $J = 8.6, 0.9$  Hz, 2H), 4.80 (q,  $J = 6.6$  Hz, 1H), 3.94 (s, 1H), 1.60 (d,  $J = 6.6$  Hz, 3H);  $^{13}\text{C}$  NMR (101 MHz,  $\text{CDCl}_3$ ):  $\delta$  150.3, 147.0, 129.3, 126.8, 123.7, 123.1, 117.9, 113.6, 49.6, 24.7.

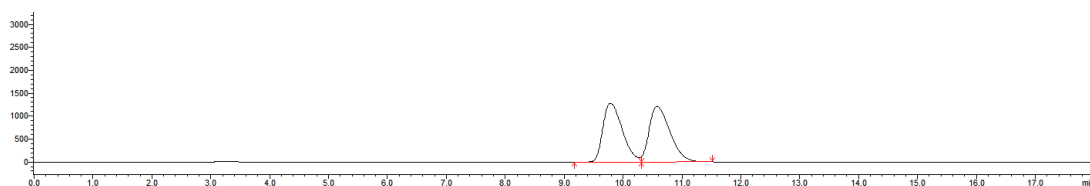

| Peak# | Ret. Time | Area     | Height  | Conc.   | Name | Area%   |
|-------|-----------|----------|---------|---------|------|---------|
| 1     | 9.788     | 29506821 | 1281251 | 49.811  |      | 49.811  |
| 2     | 10.579    | 29730668 | 1210352 | 50.189  |      | 50.189  |
| Total |           | 59237489 | 2491603 | 100.000 |      | 100.000 |

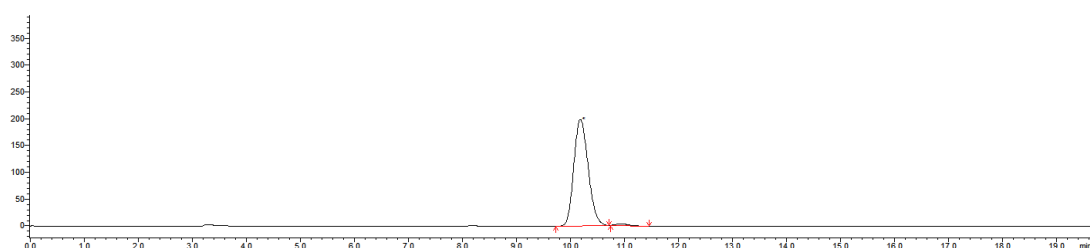

| Peak# | Ret. Time | Area    | Height | Conc.   | Name | Area%   |
|-------|-----------|---------|--------|---------|------|---------|
| 1     | 10.187    | 3652705 | 198272 | 98.768  |      | 98.768  |
| 2     | 10.939    | 45581   | 3082   | 1.232   |      | 1.232   |
| Total |           | 3698285 | 201335 | 100.000 |      | 100.000 |

(*S*)-4-Fluoro-*N*-(1-phenylethyl)benzenamine **7j**.<sup>3</sup> 42.1 mg (98% yield) of **7j** was obtained as a

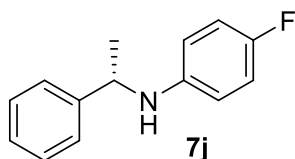

colorless oil after purification with column chromatography on silica gel (hexanes/EtOAc, 20/1). 97% ee was determined by chiral HPLC (chiralcel

OD-H, *n*-hexane/*i*-PrOH = 99/1, flow rate = 0.8 mL/min,  $\lambda = 254$  nm,  $T =$

40 °C):  $t_R = 11.1$  min (major), 9.5 min (minor).  $[\alpha]_D^{25} = +20.1$  ( $c$  1.0,  $\text{CHCl}_3$ ).  $^1\text{H}$  NMR (400 MHz,  $\text{CDCl}_3$ ):  $\delta$  7.37 – 7.27 (m, 4H), 7.21 (tt,  $J = 6.2, 1.8$  Hz, 1H), 6.83 – 6.72 (m, 2H), 6.44 – 6.36 (m, 2H), 4.40 (q,  $J = 6.7$  Hz, 1H), 3.90 (s, 1H), 1.48 (d,  $J = 6.7$  Hz, 3H);  $^{13}\text{C}$  NMR (101 MHz,  $\text{CDCl}_3$ ):  $\delta$  155.7 (d,  $J_{\text{C-F}} = 234.7$  Hz), 145.1, 143.7 (d,  $J_{\text{C-F}} = 1.6$  Hz), 128.7, 127.0, 125.9, 115.6 (d,  $J_{\text{C-F}} = 22.2$  Hz), 114.2 (d,  $J_{\text{C-F}} = 7.3$  Hz), 54.1, 25.1;  $^{19}\text{F}$  NMR (376 MHz,  $\text{CDCl}_3$ ):  $\delta$  -128.2.

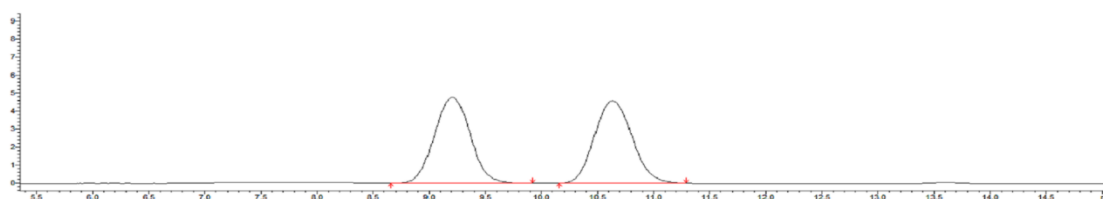

| Peak# | Ret. Time | Area   | Height | Conc.   | Name | Area%   |
|-------|-----------|--------|--------|---------|------|---------|
| 1     | 9.209     | 105771 | 4750   | 49.828  |      | 49.828  |
| 2     | 10.635    | 106499 | 4585   | 50.172  |      | 50.172  |
| Total |           | 212270 | 9315   | 100.000 |      | 100.000 |

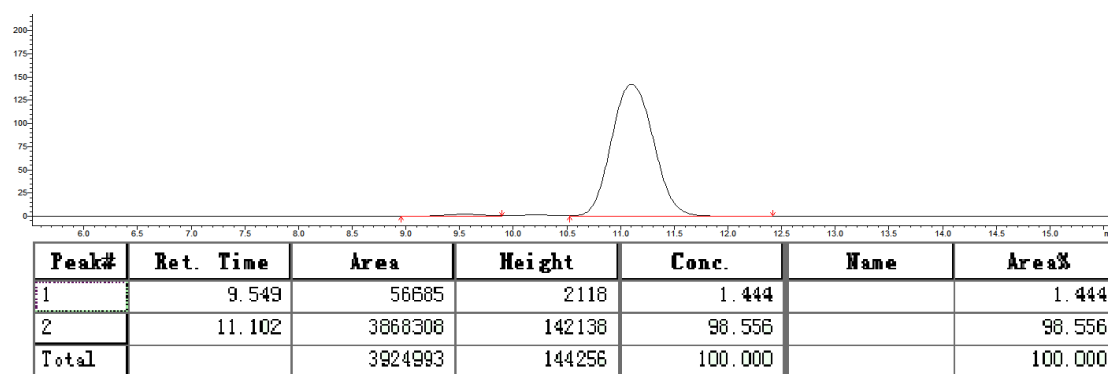

**(S)-4-nitrophenyl-N-(1-phenylethyl)aniline 7k.**<sup>6</sup> 48 mg (99% yield) of **7k** was obtained as a yellow oil after purification with column chromatography on silica gel (hexanes/EtOAc, 20/1). 90% ee was determined by chiral HPLC (chiralpak AD-H, *n*-hexane/*i*-PrOH = 90/10, flow rate = 1.0 mL/min, I = 254 nm, T = 40 °C):  $t_R$  = 10.5 min (major), 11.5 min (minor).  $[\alpha]_D^{25}$  = +5.9 (*c* 1.0, CHCl<sub>3</sub>). <sup>1</sup>H NMR (700 MHz, CDCl<sub>3</sub>): δ 7.98 (d, *J* = 9.2 Hz, 1H), 7.38 – 7.19 (m, 5H), 6.55 – 6.38 (m, 2H), 5.02 (d, *J* = 5.8 Hz, 1H), 4.58 (q, *J* = 6.6 Hz, 1H), 1.57 (d, *J* = 6.8 Hz, 3H); <sup>13</sup>C NMR (101 MHz, CDCl<sub>3</sub>): δ 152.4, 143.3, 138.1, 129.0, 127.5, 126.3, 125.7, 111.9, 53.3, 24.6.

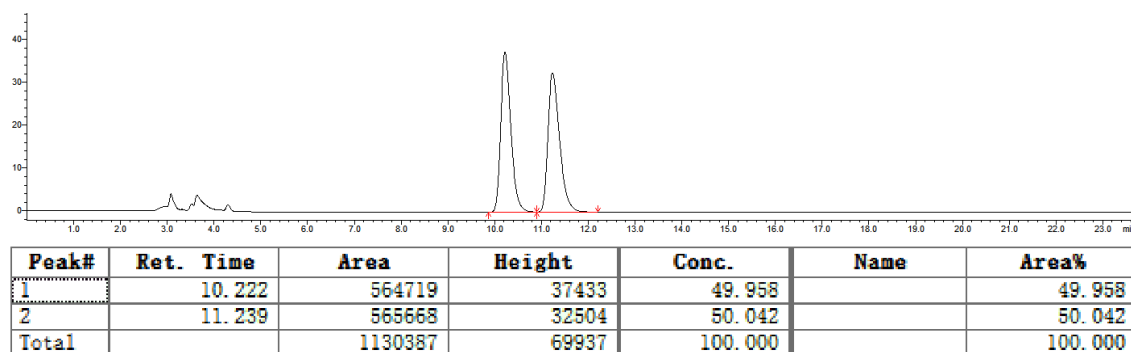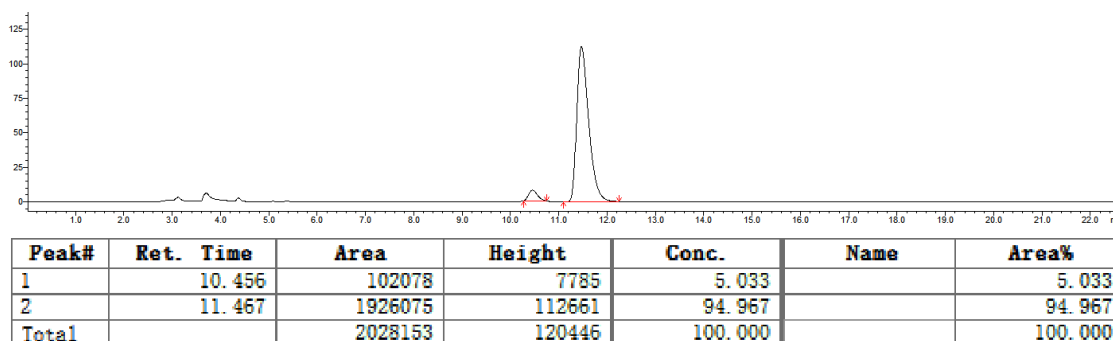

**(S)-4-Methoxyphenyl-N-(1-phenylethyl)aniline 7l.**<sup>7</sup> 41 mg (90% yield) of **7l** was obtained as a slight yellowish oil after purification with column chromatography on silica gel (hexanes/EtOAc, 20/1). 97% ee was determined by chiral HPLC (chiralcel

OD-H, *n*-hexane/*i*-PrOH = 98/2, flow rate = 0.8 mL/min,  $\lambda = 254$  nm,  $T = 40$  °C):  $t_R = 11.7$  min (major), 13.3 min (minor).  $[\alpha]_D^{25} = +8.4$  ( $c$  1.0,  $\text{CHCl}_3$ ).  $^1\text{H}$  NMR (400 MHz,  $\text{CDCl}_3$ ):  $\delta$  7.31 (m, 4H), 7.26 – 7.21 (m, 1H), 6.90 – 6.64 (m, 2H), 6.60 – 6.40 (m, 2H), 4.43 (q,  $J = 6.7$  Hz, 1H), 3.71 (s, 3H), 1.52 (d,  $J = 6.7$  Hz, 3H);  $^{13}\text{C}$  NMR (101 MHz,  $\text{CDCl}_3$ ):  $\delta$  151.93, 145.5, 141.6, 128.6, 126.8, 125.9, 114.8, 114.6, 55.8, 54.3, 25.2.

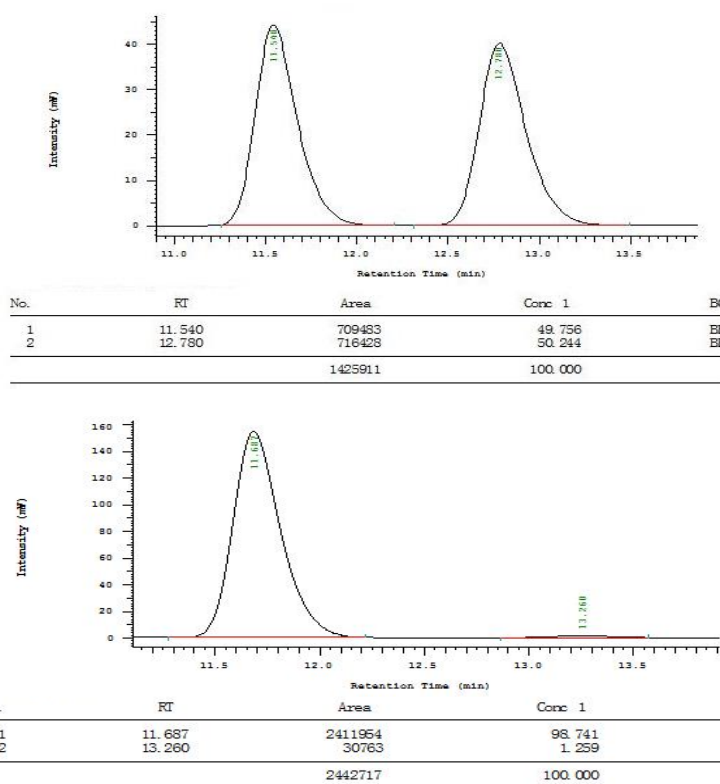

### Gram-scale synthesis and derivatizations of **5k**

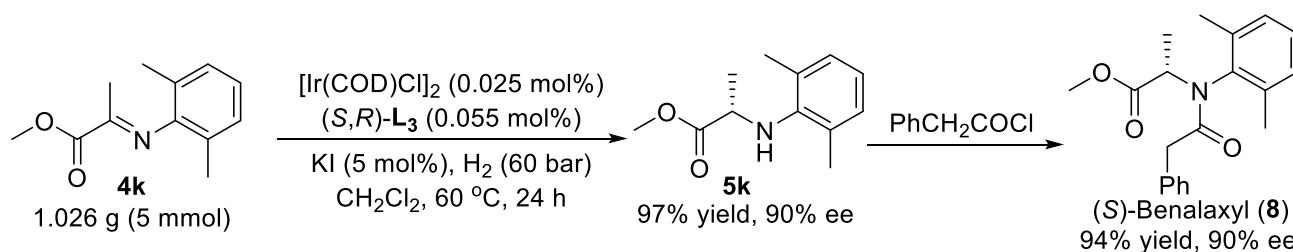

**Gram-scale synthesis of **5k**.** In a nitrogen-filled glovebox, a stainless steel autoclave was charged with  $[\text{Ir}(\text{COD})\text{Cl}]_2$  (0.00125 mmol),  $(S,R)\text{-L}_3$  (0.00275 mmol) and KI (0.25 mmol) in 1.0 mL of degassed  $\text{CH}_2\text{Cl}_2$ . After stirring for 1 h at room temperature, a solution of imines **4k** (5.0 mmol, 1.026 g) in 20 mL of the same solvent was added to the reaction mixture, and then the hydrogenation was performed at  $60$  °C under a  $\text{H}_2$  pressure of 6.0 MPa for 24 h. The solvent was then evaporated and the

residue was purified by flash column chromatography to give the corresponding hydrogenation product **5k** (97% yield, 1.0003 g, 90% ee).

**Synthesis of (S)-Benalaxyl 8.** To a stirred solution of **5k** (2.0 mmol, 414.5 mg) in toluene was added NaHCO<sub>3</sub> (1.2 equiv., 2.4 mmol, 201.6 mg) at 0 °C. Phenylacetyl chloride (1.2 equiv., 2.4 mmol, 370.0 mg) was then slowly added and the mixture was stirred at room temperature for 3 h. The resulted mixture was washed with 5% Na<sub>2</sub>CO<sub>3</sub> and water. The layer was separated and the organic phase was dried over Na<sub>2</sub>SO<sub>4</sub>. It was filtered and concentrated under reduced pressure to give the crude product which was further purified by column chromatography.

**(S)-methyl-N-(2,6-dimethylphenyl)-N-(2-phenylacetyl)alaninate 8.**<sup>8</sup> 305.4 mg (94% yield) of **8** was

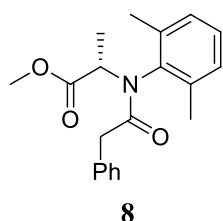

obtained as a white solid after purification with column chromatography on silica gel (hexanes/EtOAc, 20/1). 90% ee was determined by chiral HPLC (chiralcel OJ-H, *n*-hexane/*i*-PrOH = 98/2, flow rate = 1.0 mL/min, I = 254 nm, T = 40 °C): *t<sub>R</sub>* = 7.3 min (major), 8.5 min (minor). M.p.: 77 – 80 °C; [ $\alpha$ ]<sub>D</sub><sup>25</sup> = +31.9 (*c* 1.0, CHCl<sub>3</sub>).

<sup>1</sup>H NMR (400 MHz, CDCl<sub>3</sub>):  $\delta$  7.27 – 7.12 (m, 5H), 7.10 – 6.99 (m, 1H), 6.99 – 6.88 (m, 2H), 4.43 (q, *J* = 7.4 Hz, 1H), 3.76 (s, 3H), 3.33 (d, *J* = 14.5 Hz, 1H), 3.20 (d, *J* = 14.5 Hz, 1H), 2.39 (s, 3H), 1.86 (s, 3H), 0.98 (d, *J* = 7.4 Hz, 3H); <sup>13</sup>C NMR (101 MHz, CDCl<sub>3</sub>):  $\delta$  173.1, 171.7, 138.8, 138.0, 137.2, 134.2, 129.3, 129.2, 128.8, 128.6, 128.2, 126.7, 55.6, 52.1, 41.2, 18.7, 18.1, 15.1.

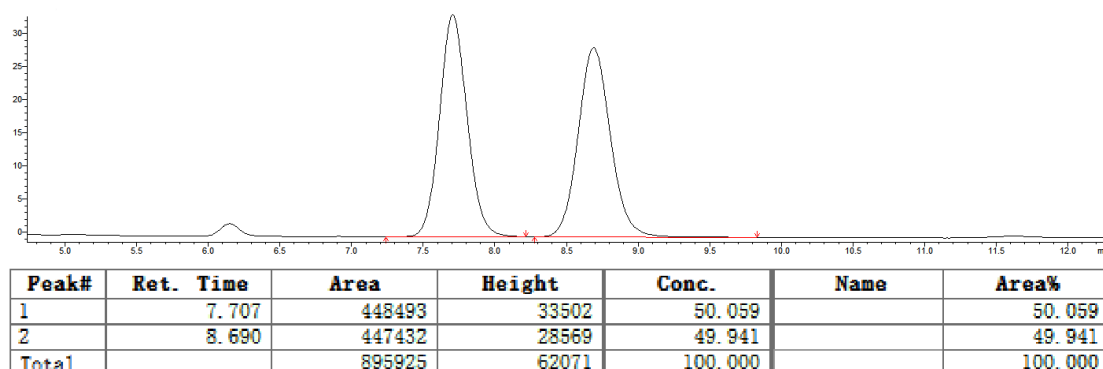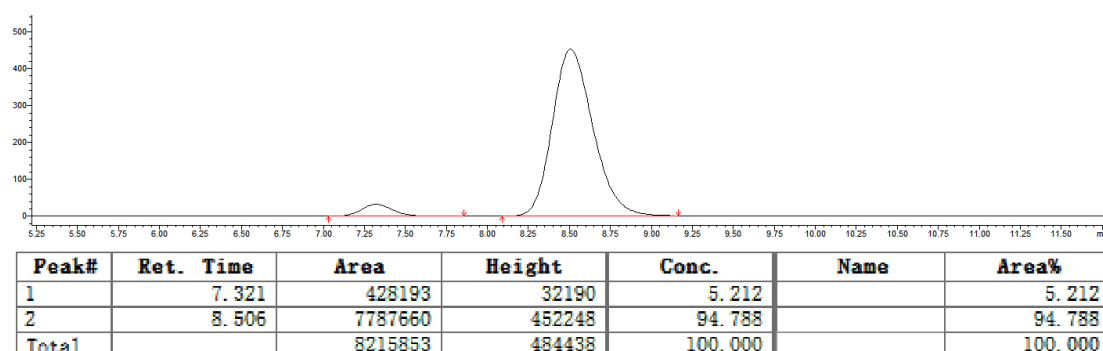

## References

1. C.-J. Hou, Y.-H. Wang, Z. Zheng, J. Xu and X.-P. Hu, *Org. Lett.*, 2012, **14**, 3554.
2. D. Xiao and X. Zhang, *Angew. Chem. Int. Ed.*, 2001, **40**, 3425.
3. Q. Li, C.-J. Hou, X.-N. Liu, D.-Z. Huang, Y.-J. Liu, R.-F. Yang and X.-P. Hu, *RSC Adv.*, 2015, **5**, 13702.
4. Y.-N. Pei, Y. Deng, J.-L. Li, L. Liu and H.-J. Zhu, *Tetrahedron Lett.*, 2014, **55**, 2948.
5. I. Chatterjee and M. Oestreich, *Org. Lett.*, 2016, **18**, 2463.
6. P. Wu, Z. Wang, M. Cheng, L. Zhou and J. Sun, *Tetrahedron*, 2008, **64**, 11304.
7. W. Tang, S. Johnston, J. A. Iggo, N. G. Berry, M. Phelan, L. Lian, J. Bacsá and J. Xiao, *Angew. Chem. Int. Ed.*, 2013, **52**, 1668.
8. Y. Gao, J. Chen, H. Wang, Ch. Liu, X. Lv, J. Li and B. Guo, *J. Agric. Food Chem.*, 2013, **61**, 9045.

# NMR spectra

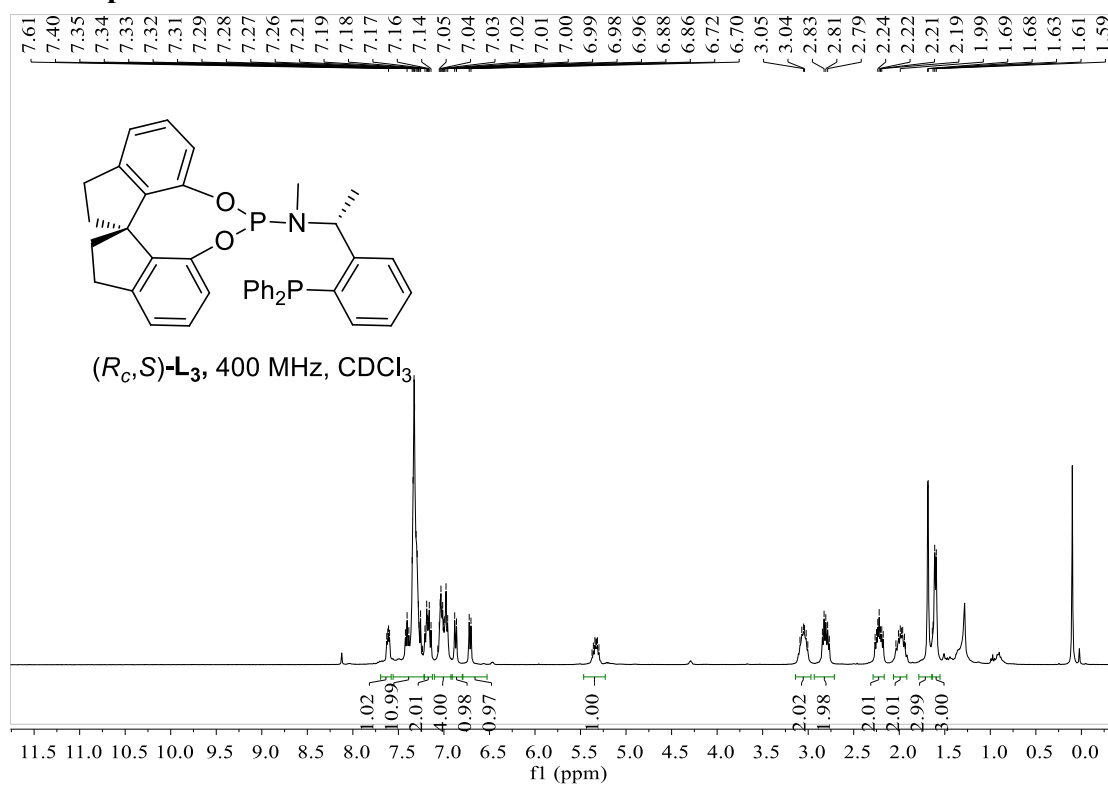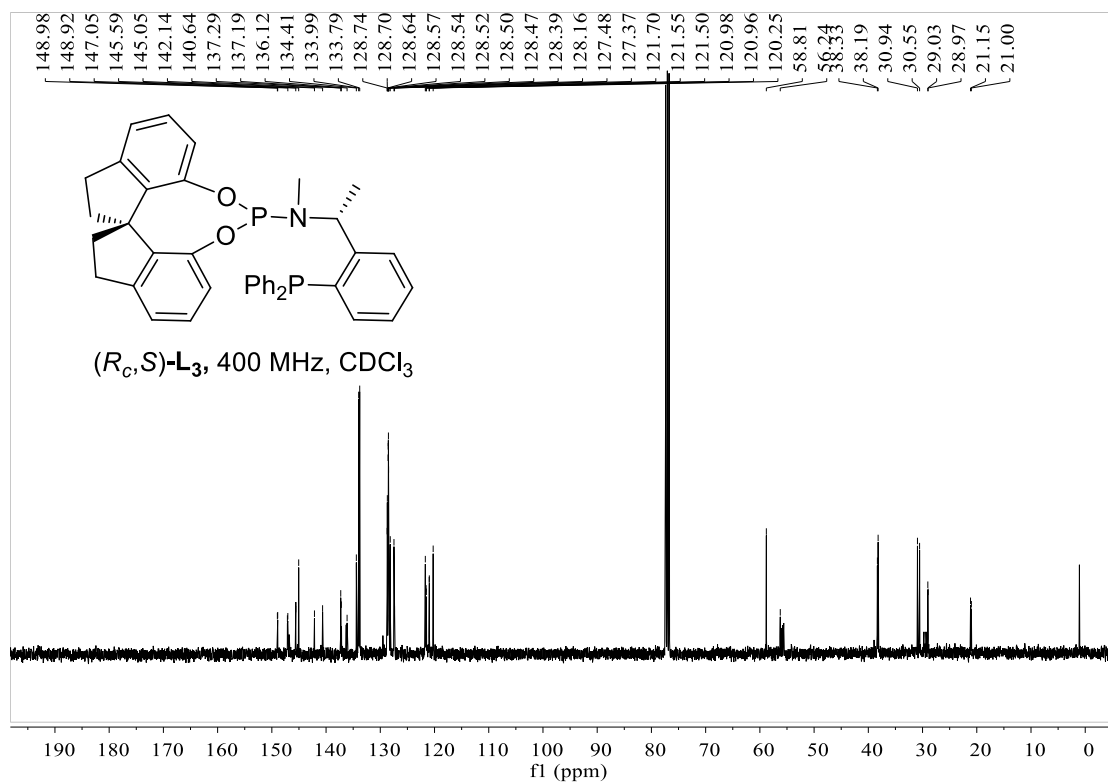

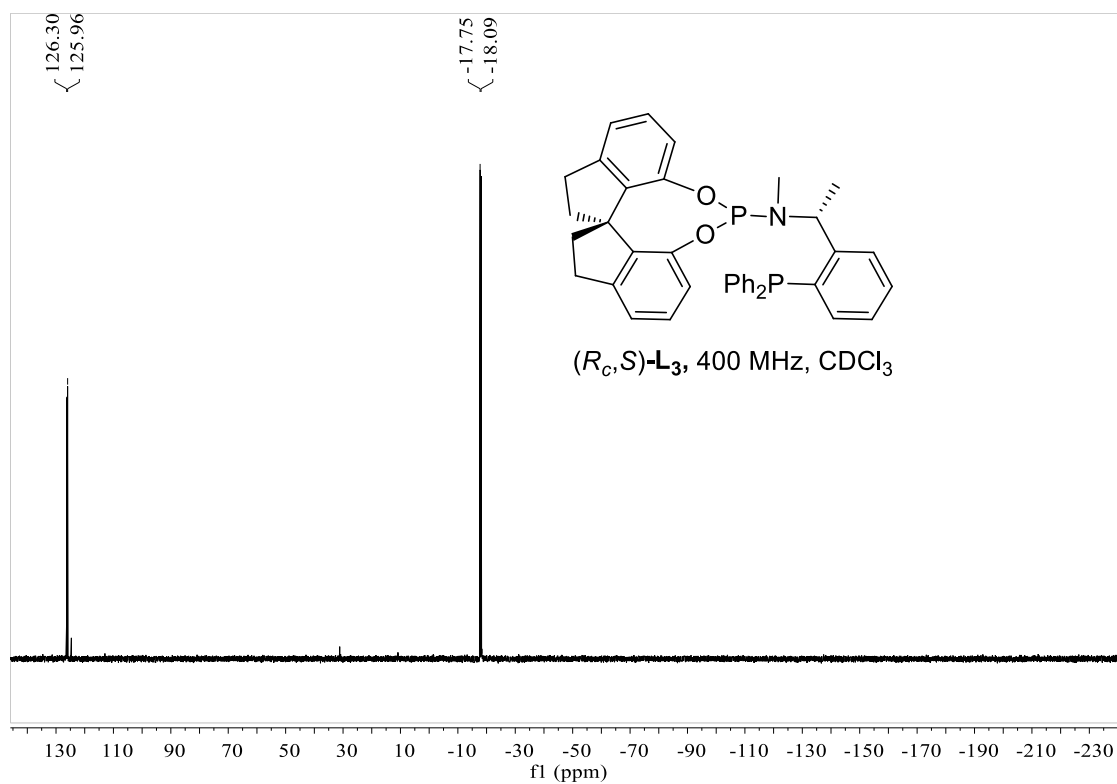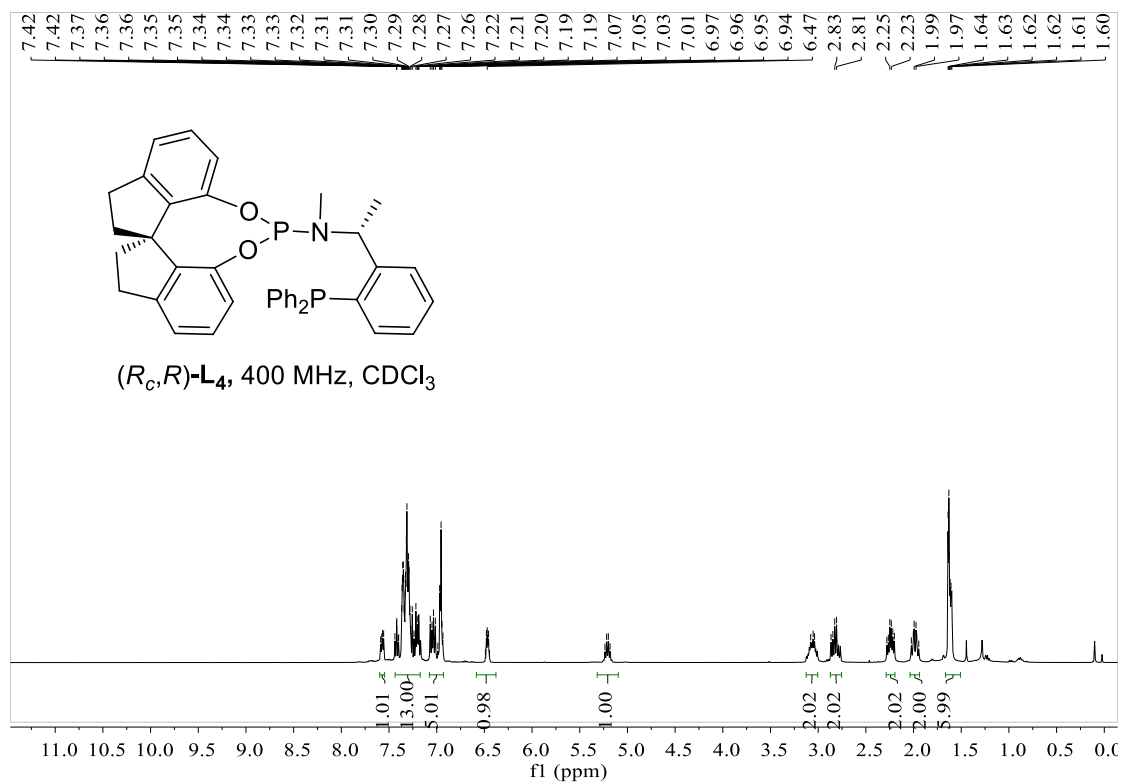

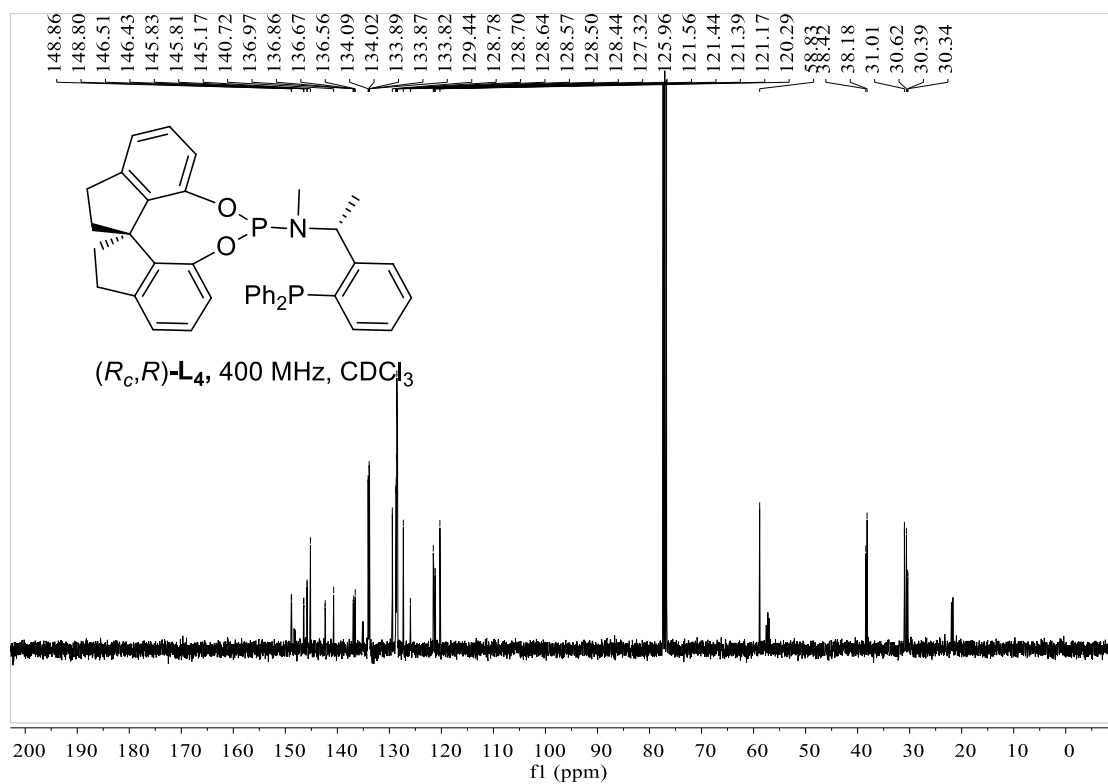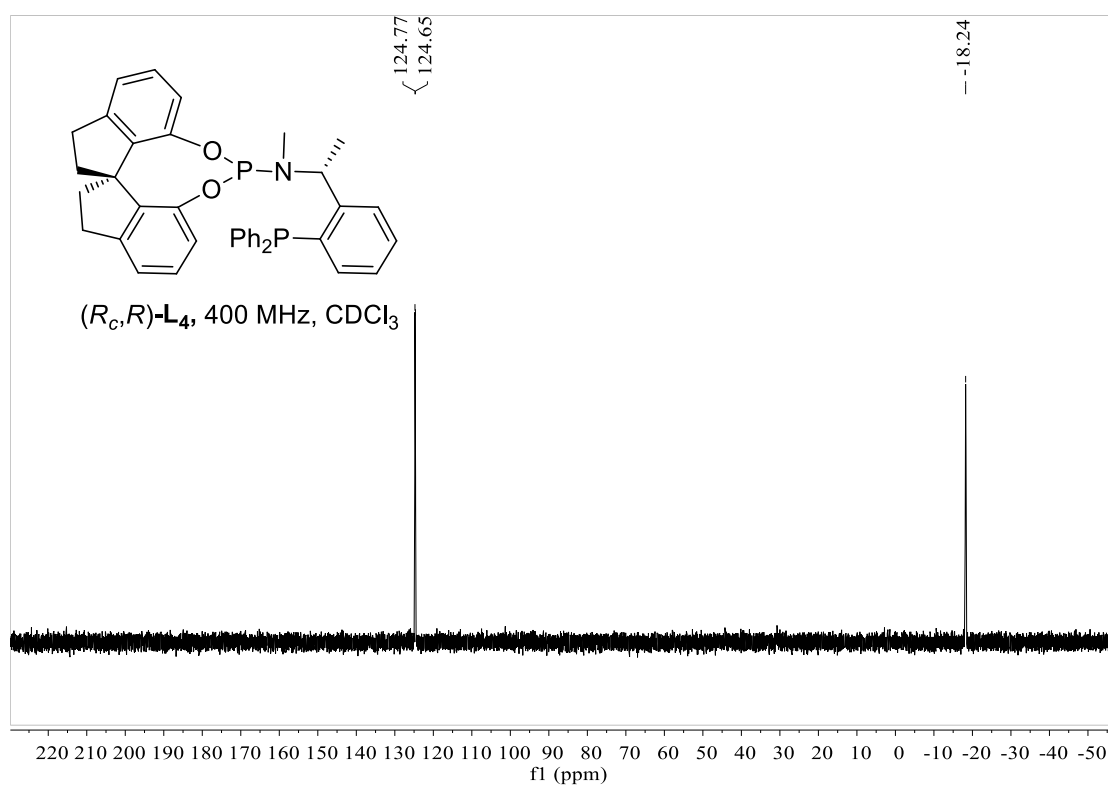

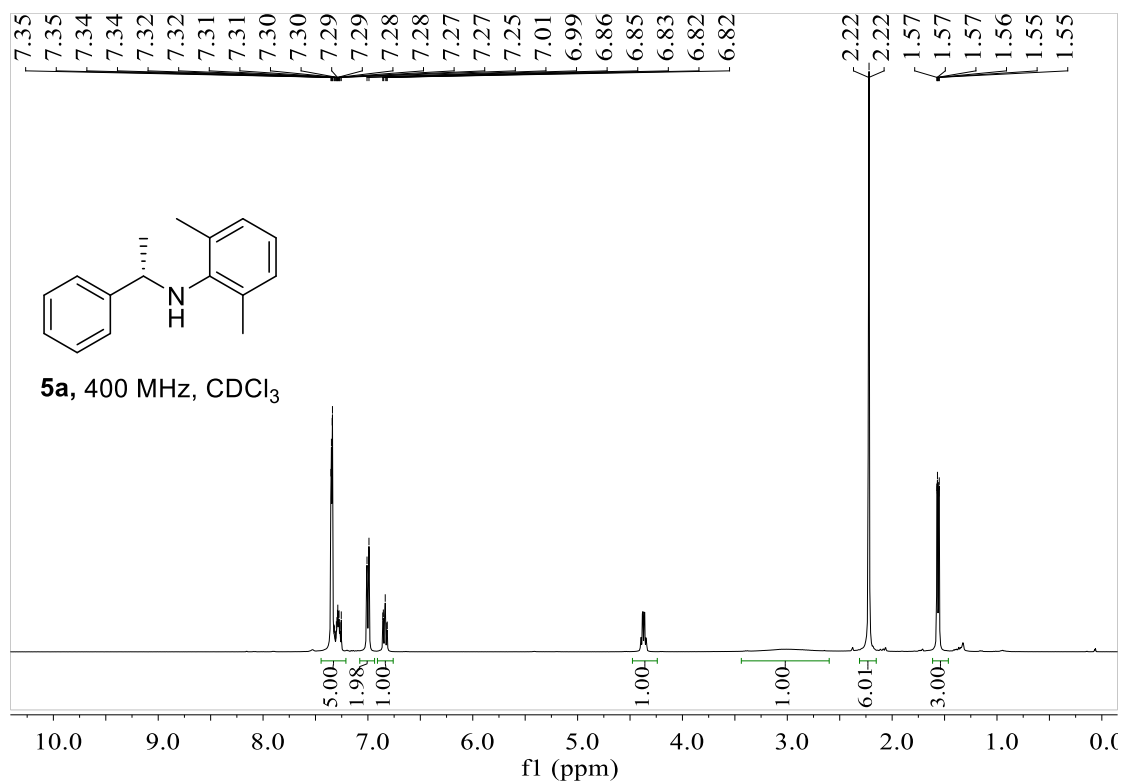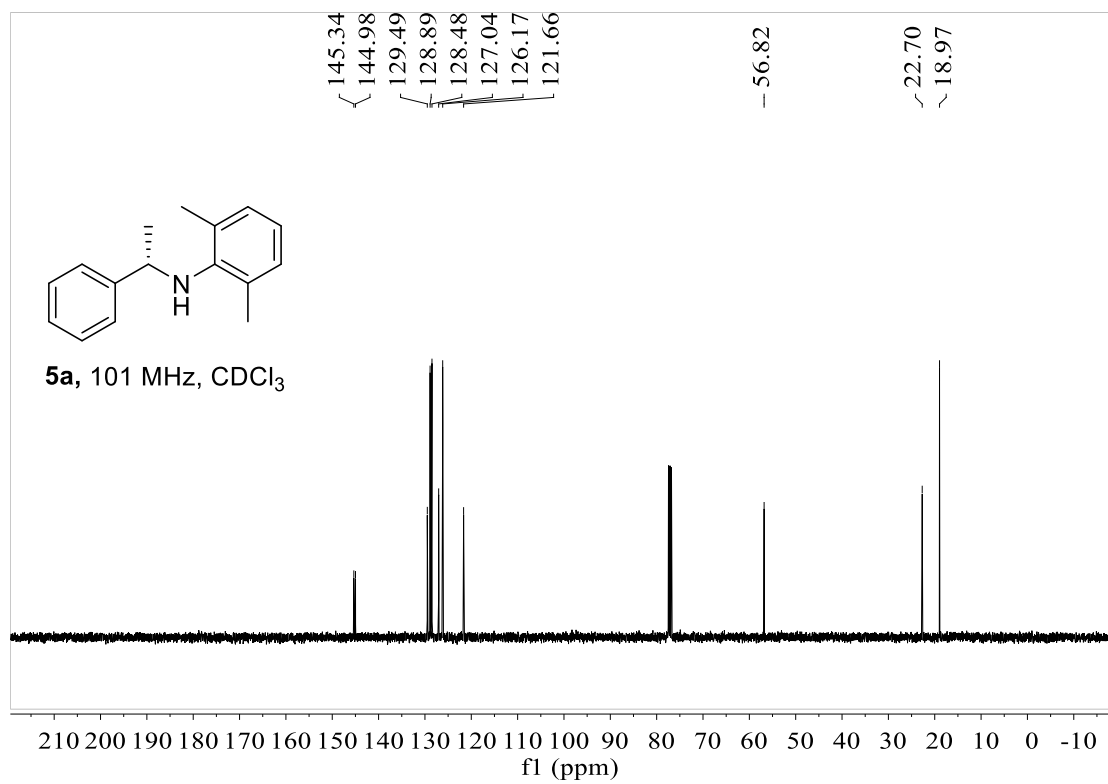

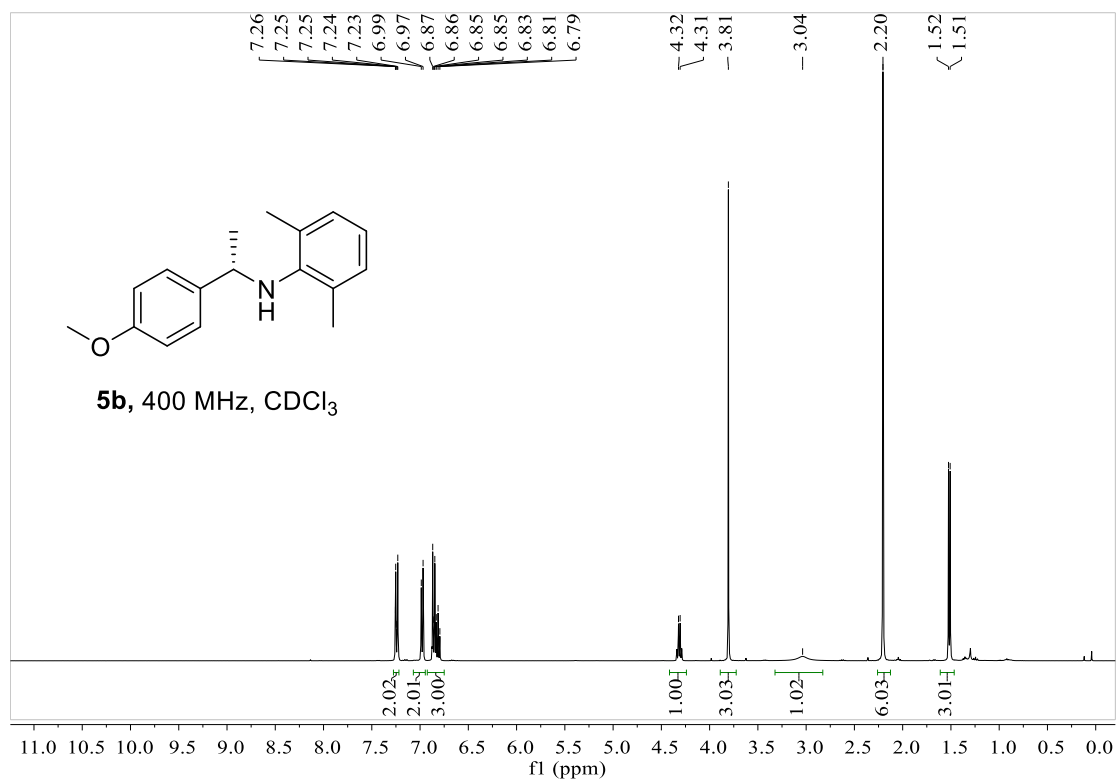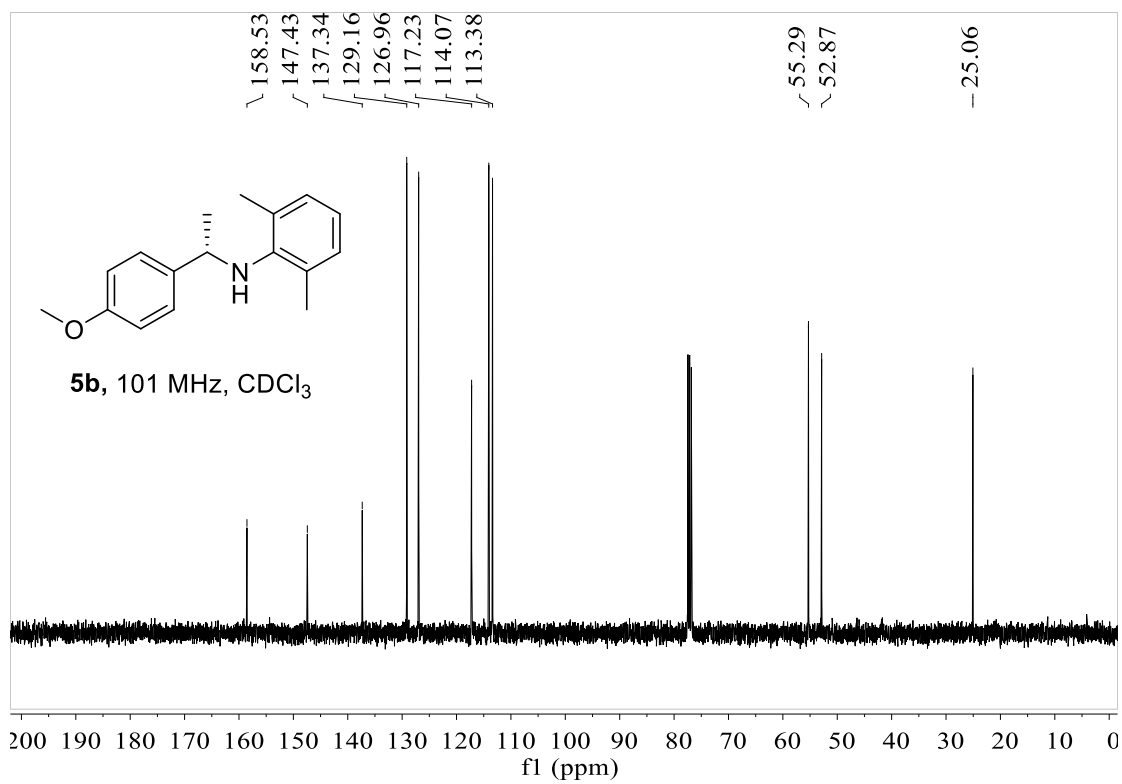

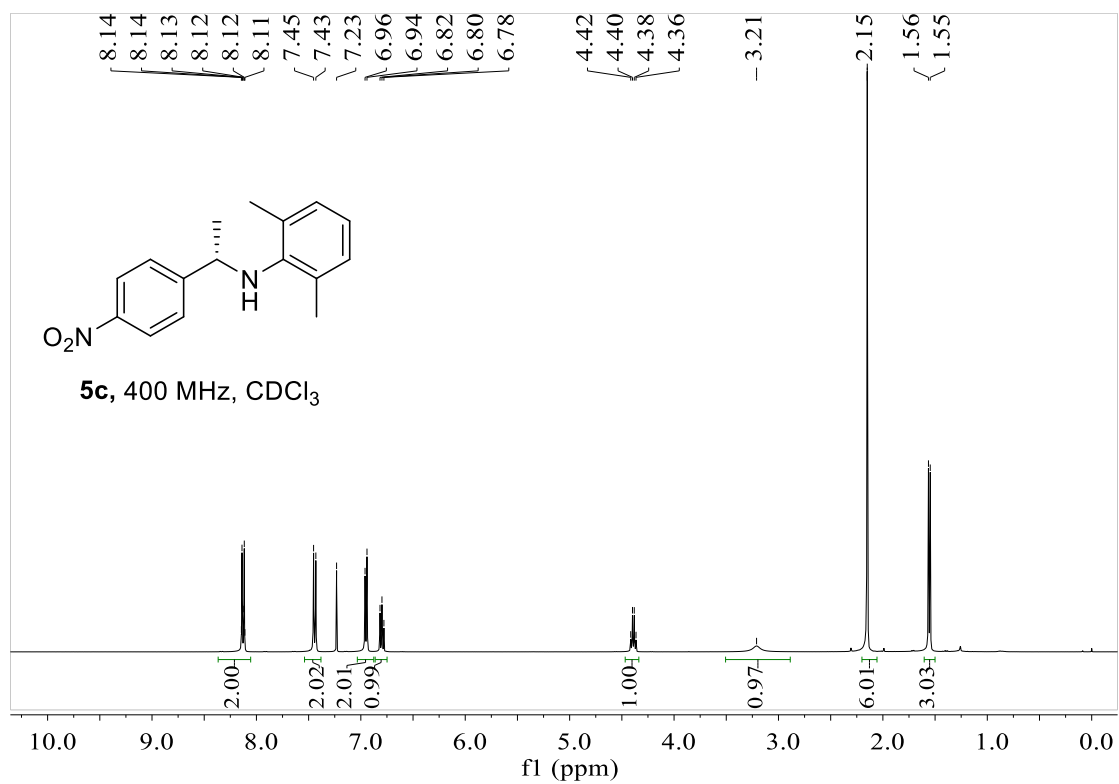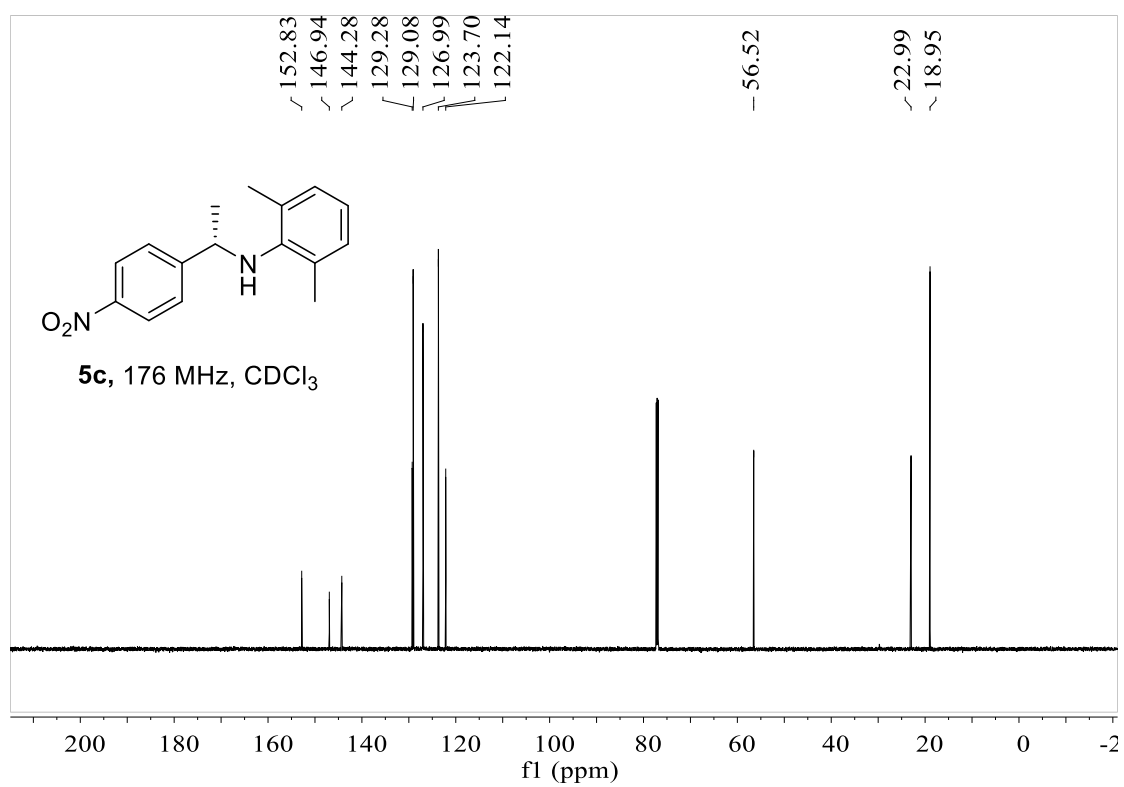

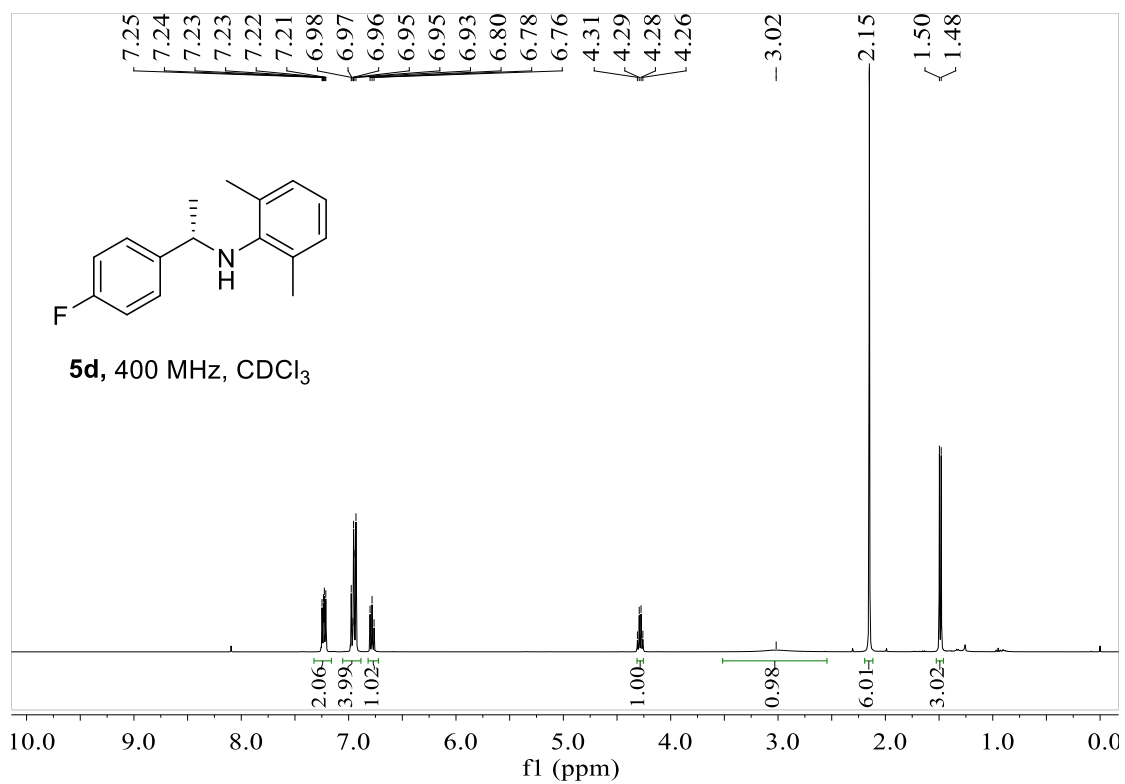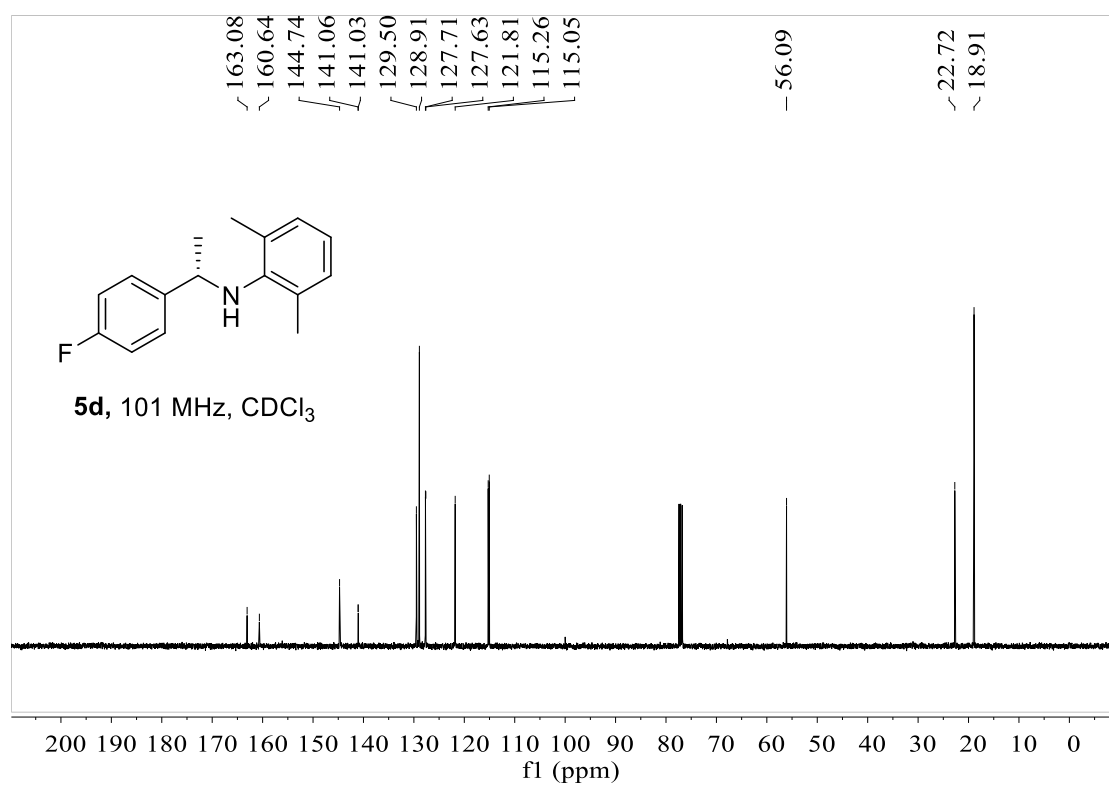

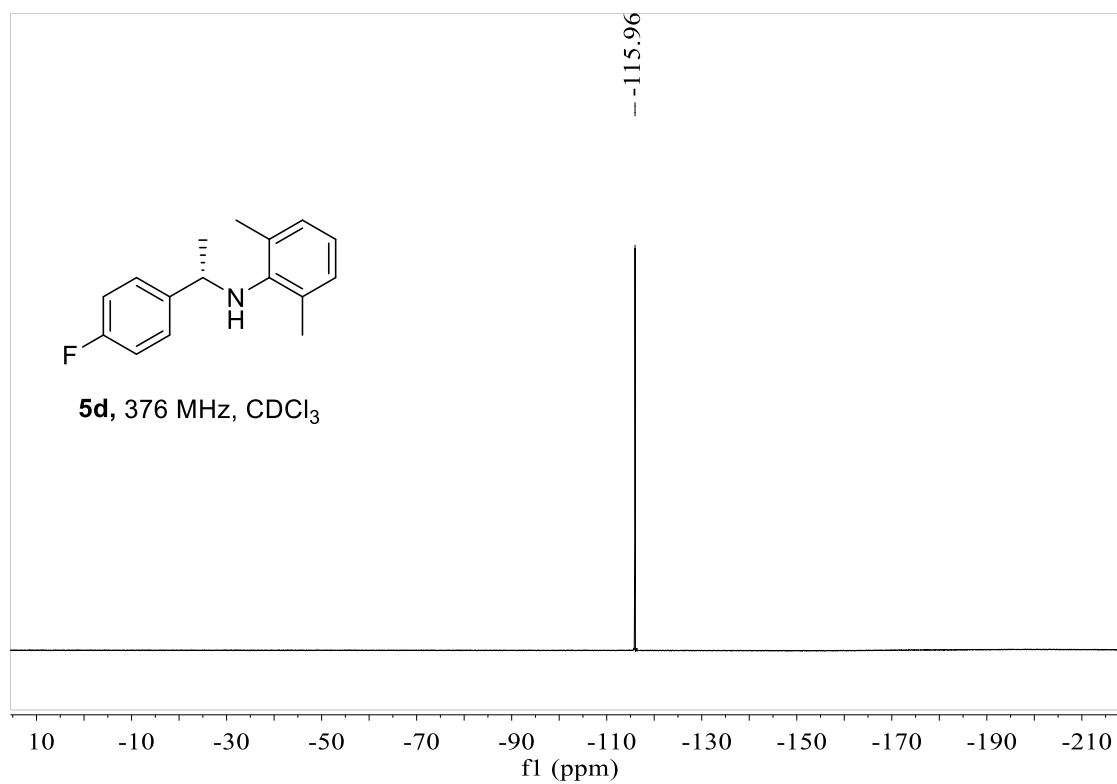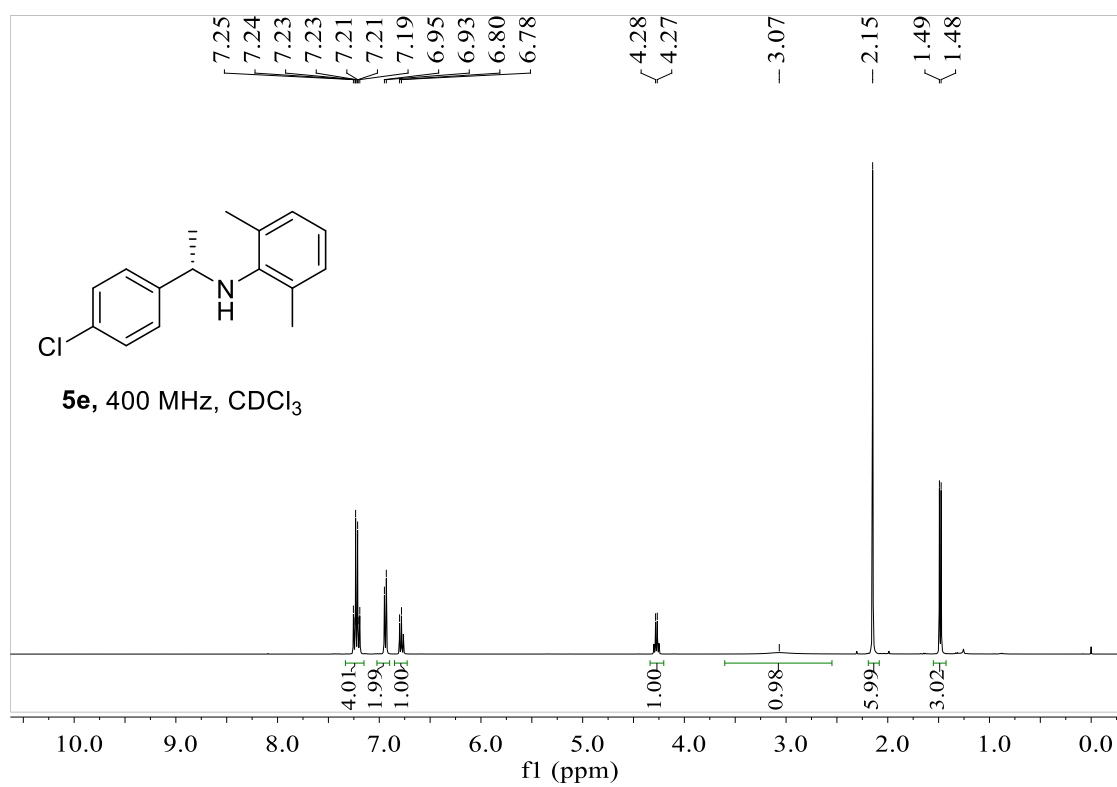

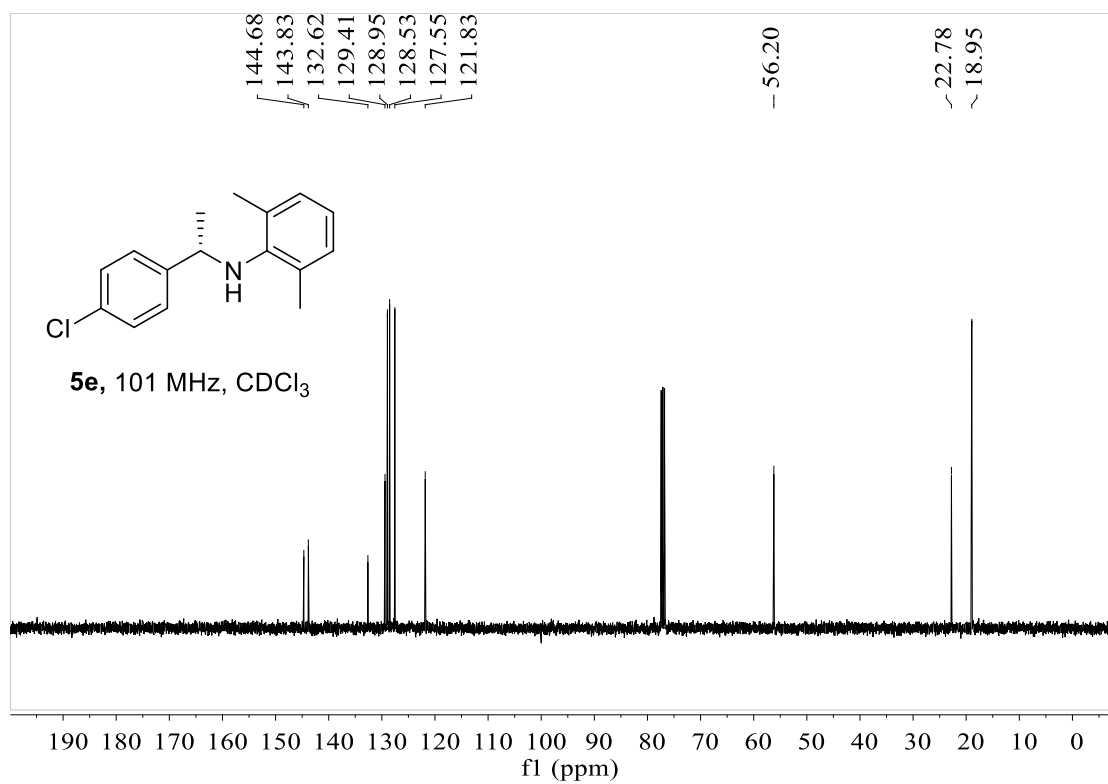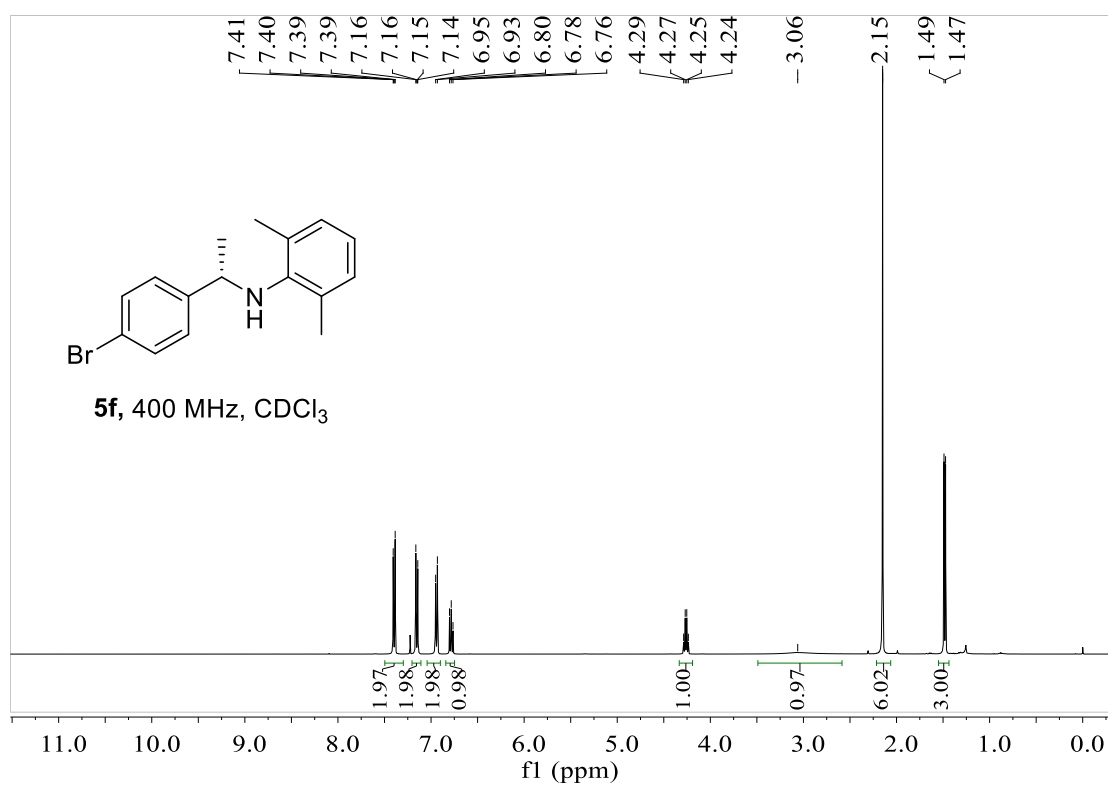

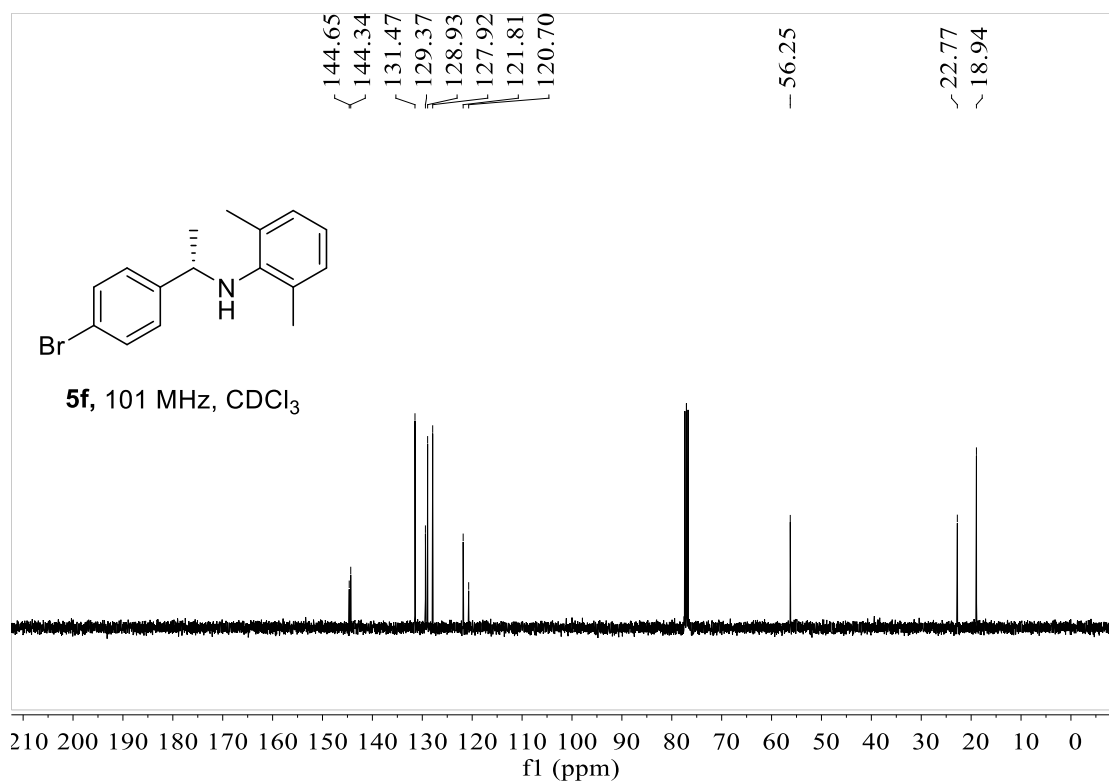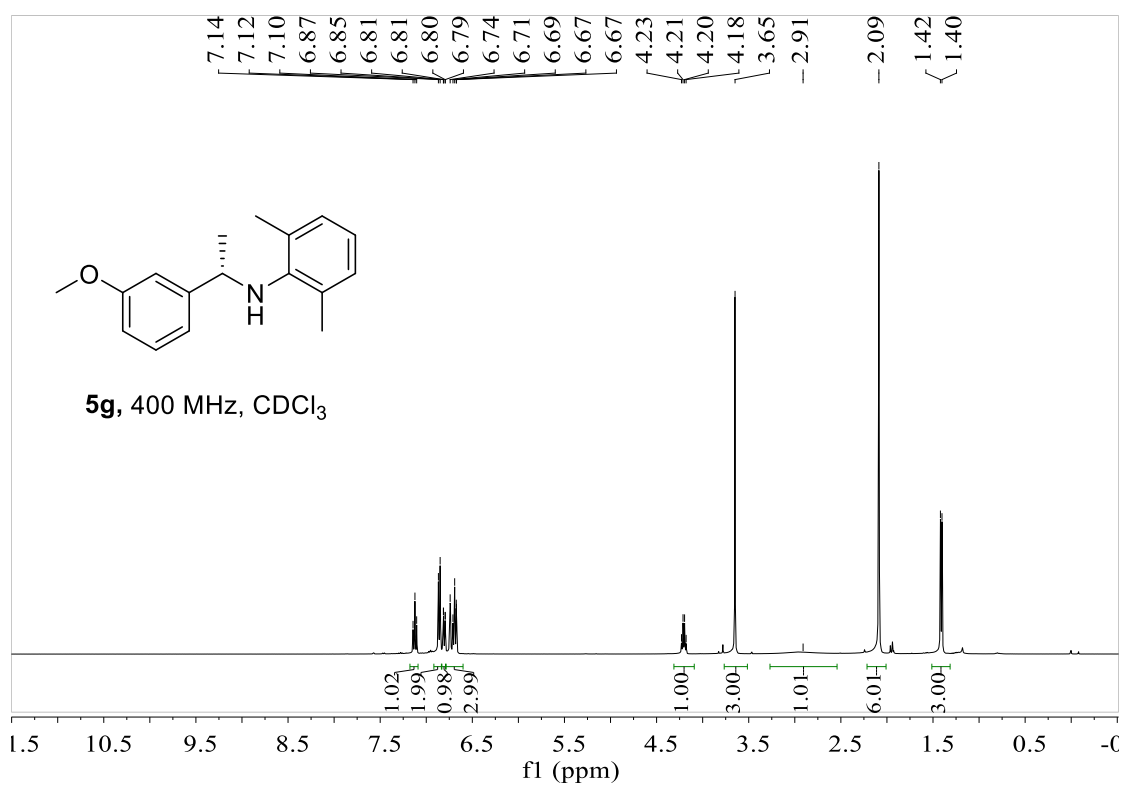

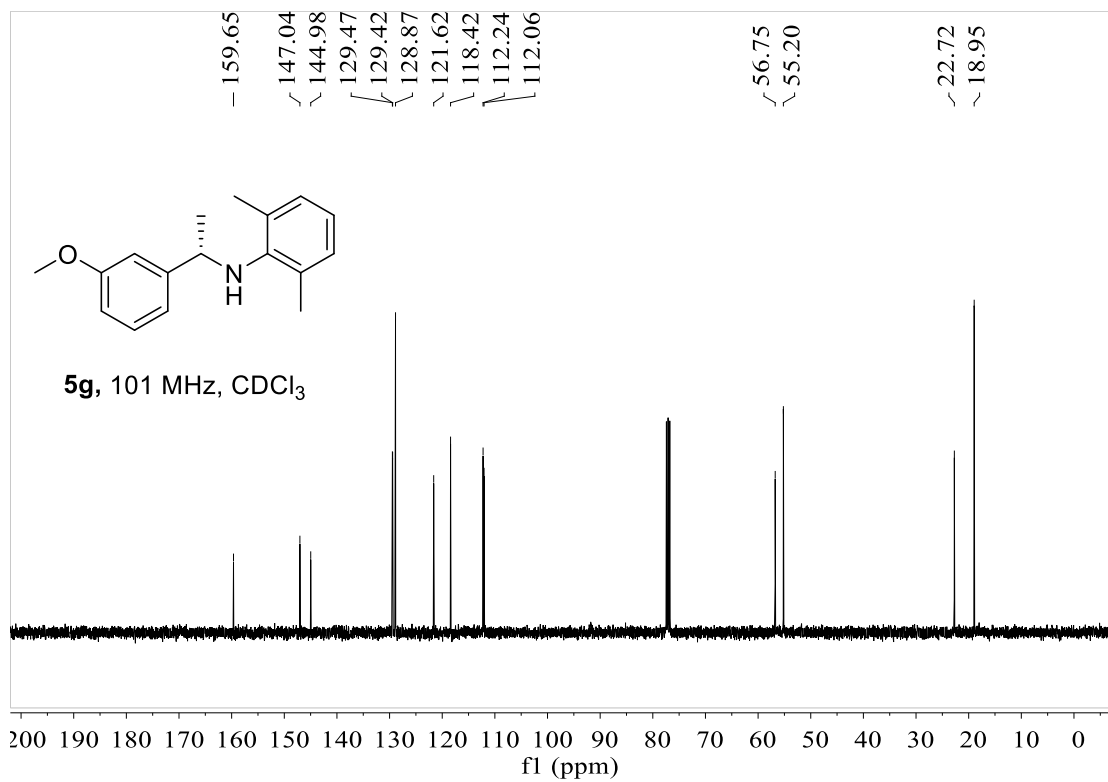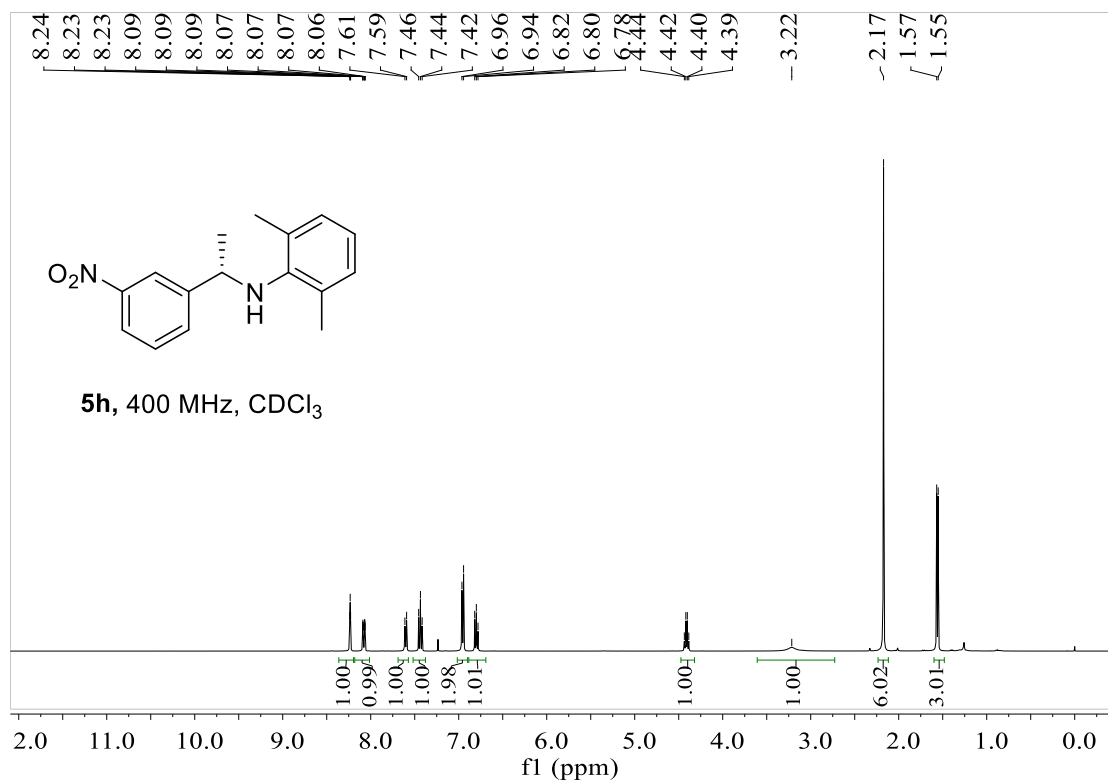

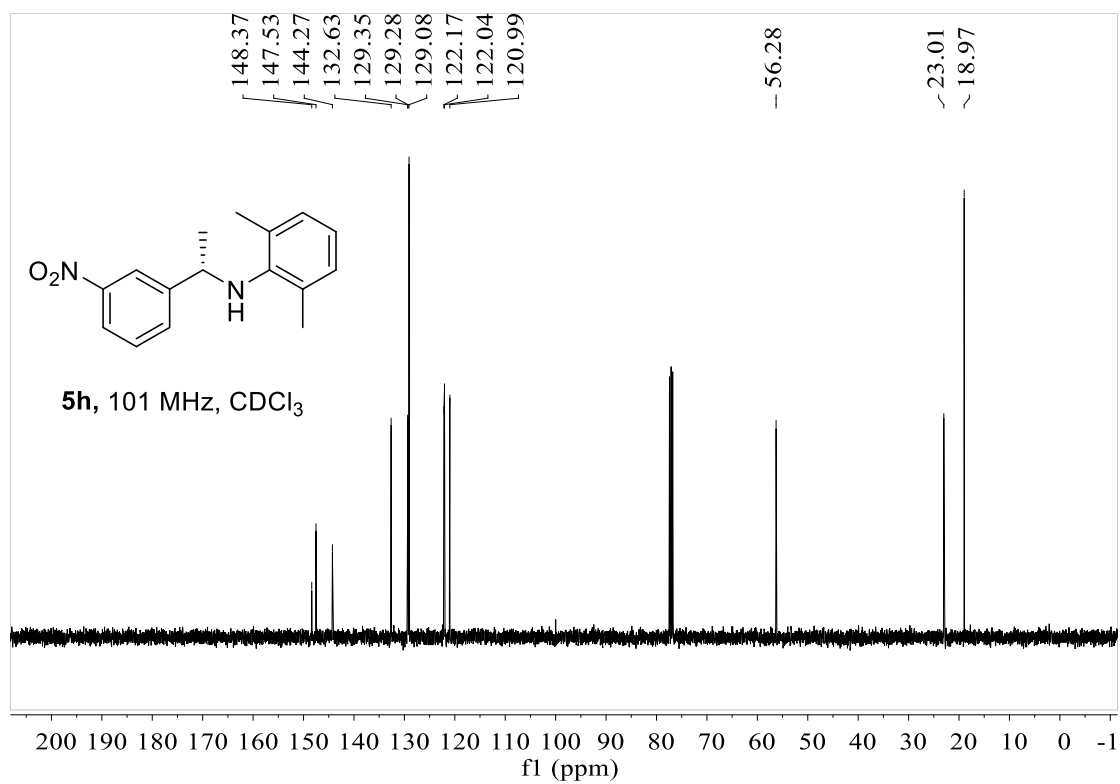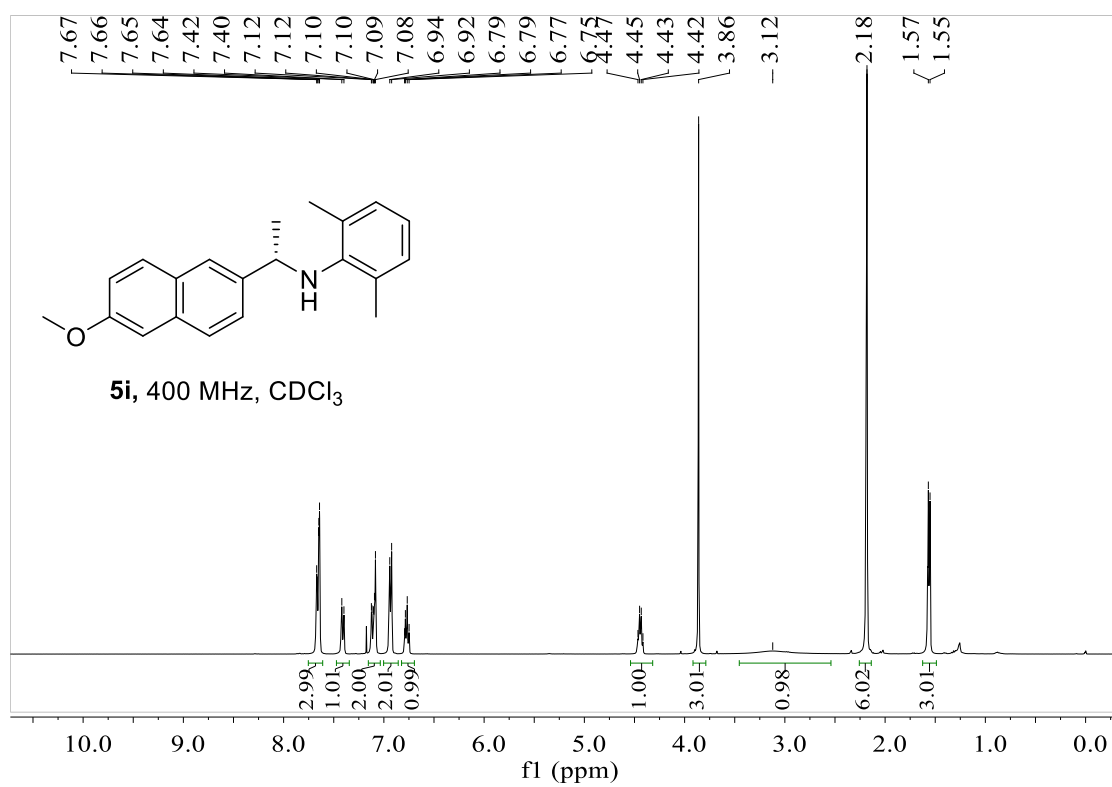

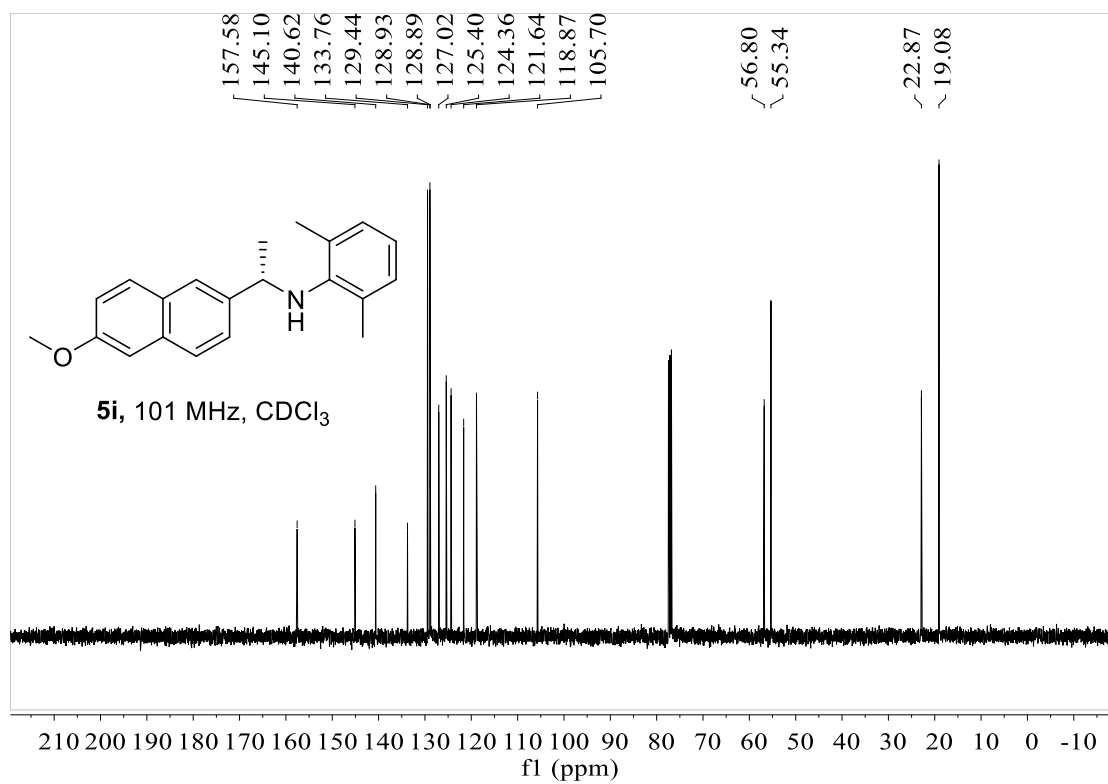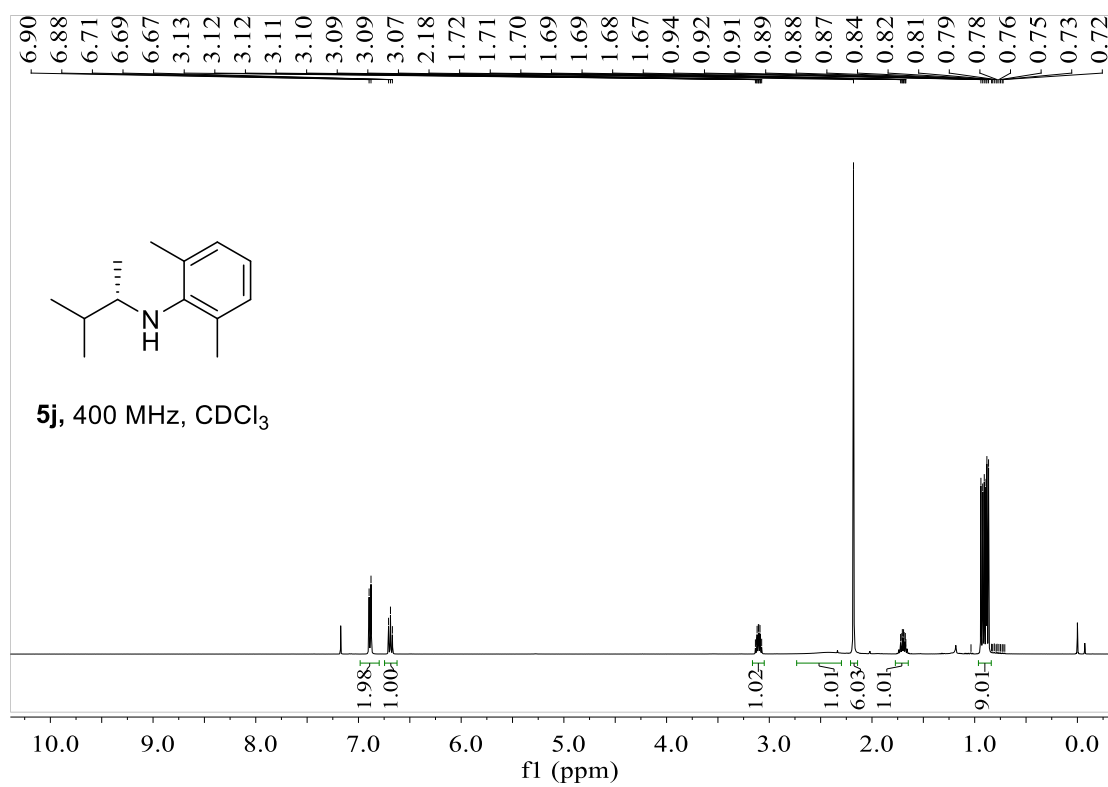

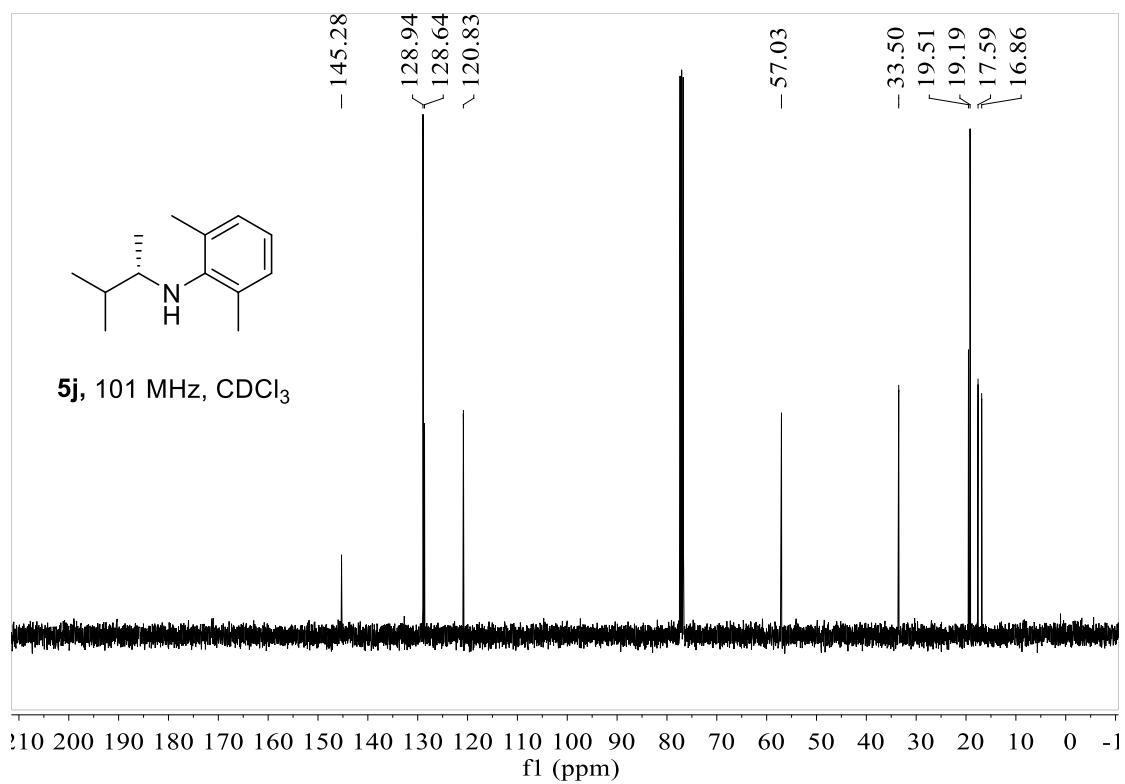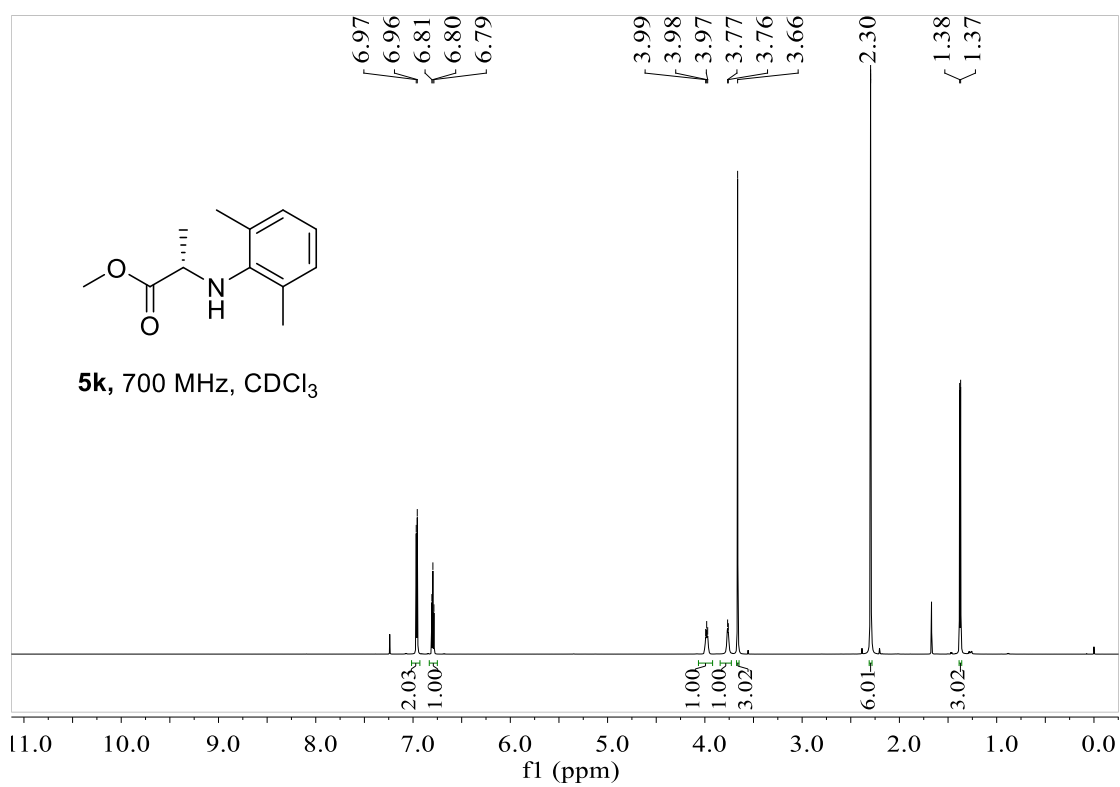

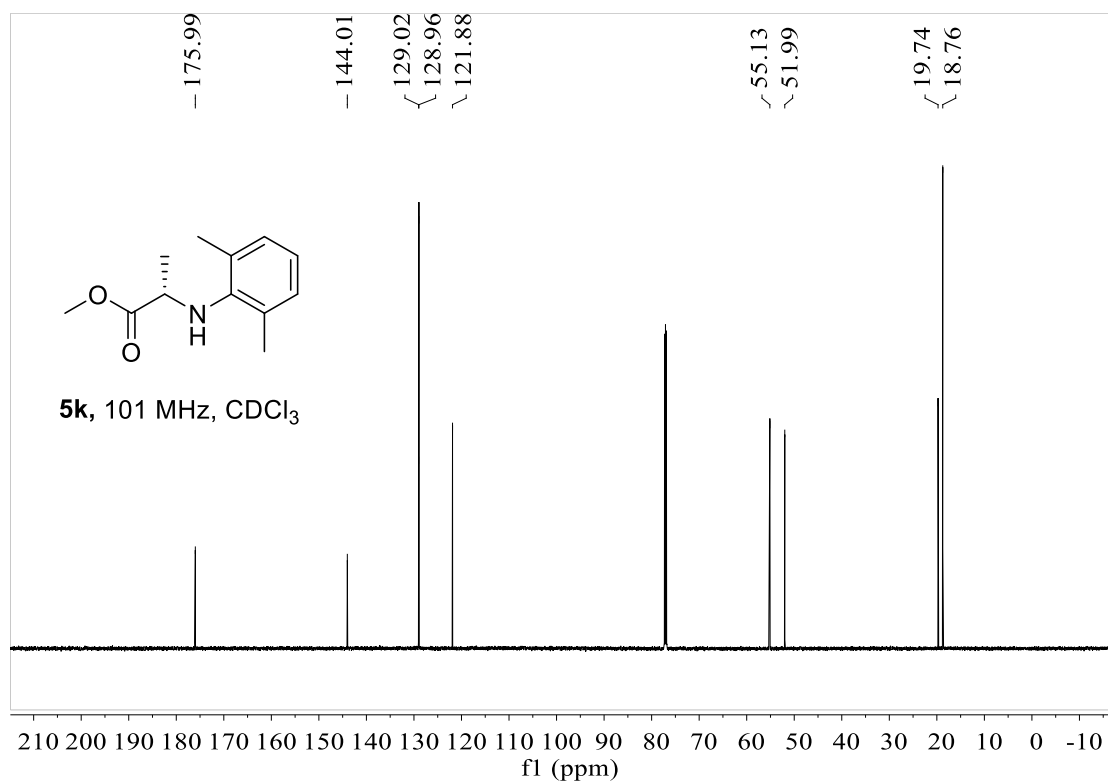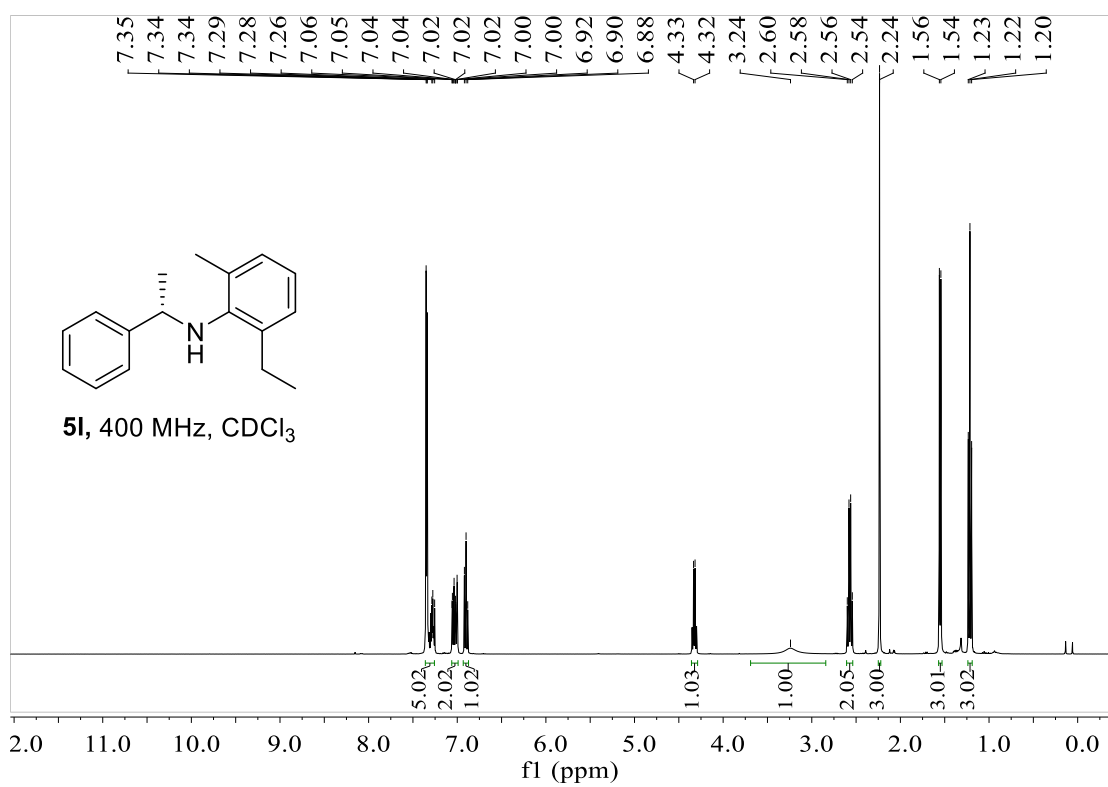

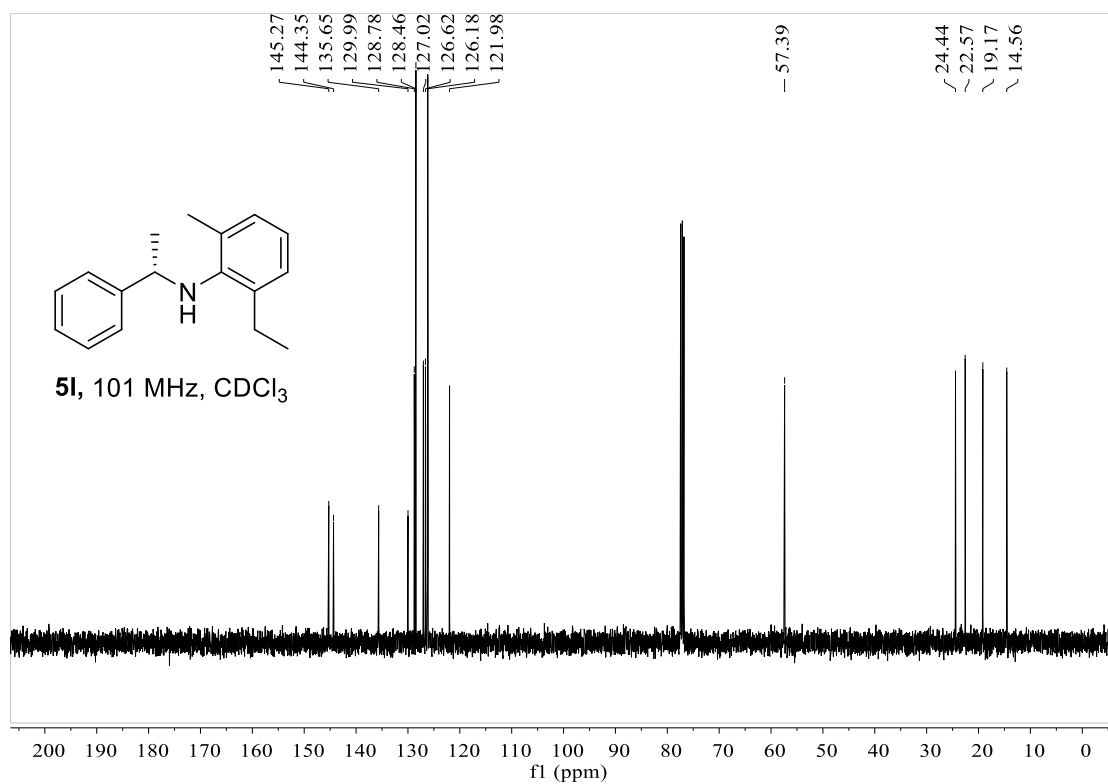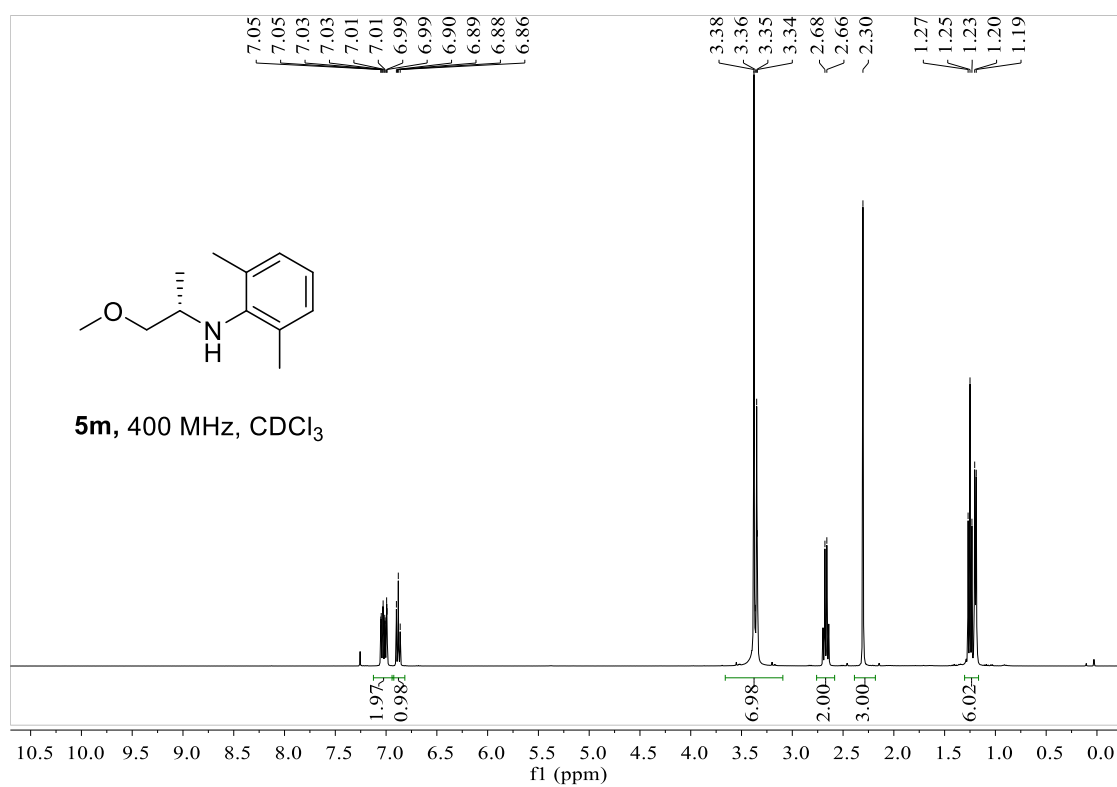

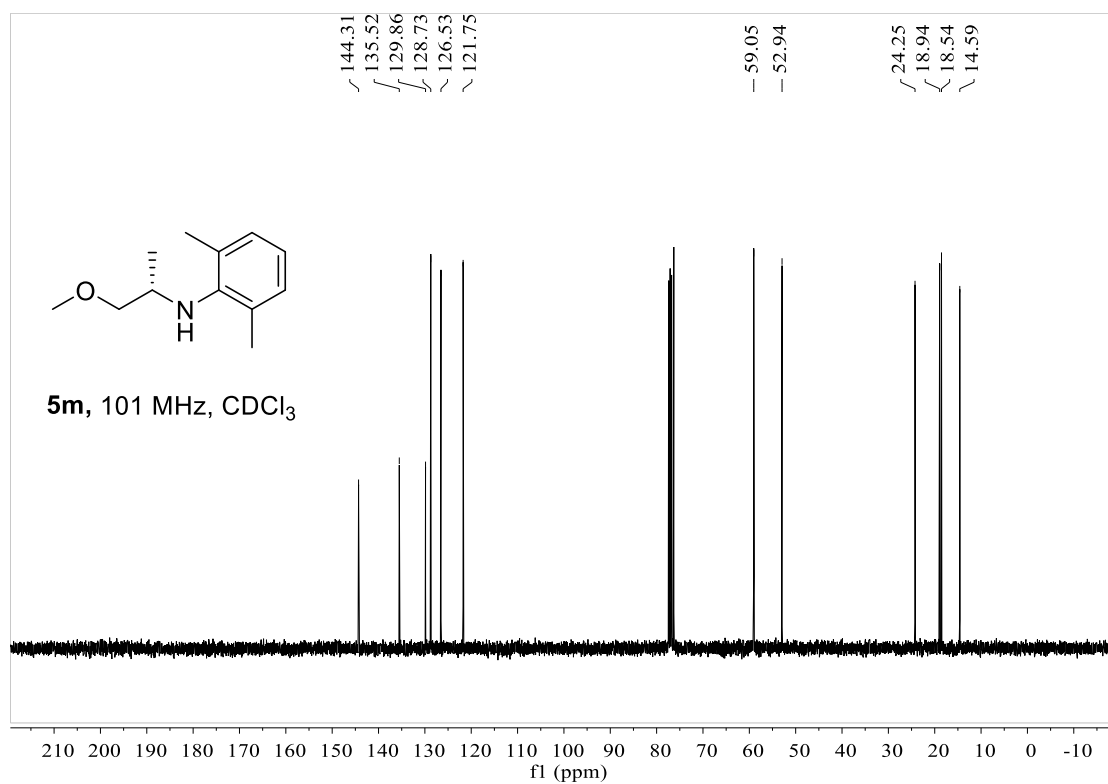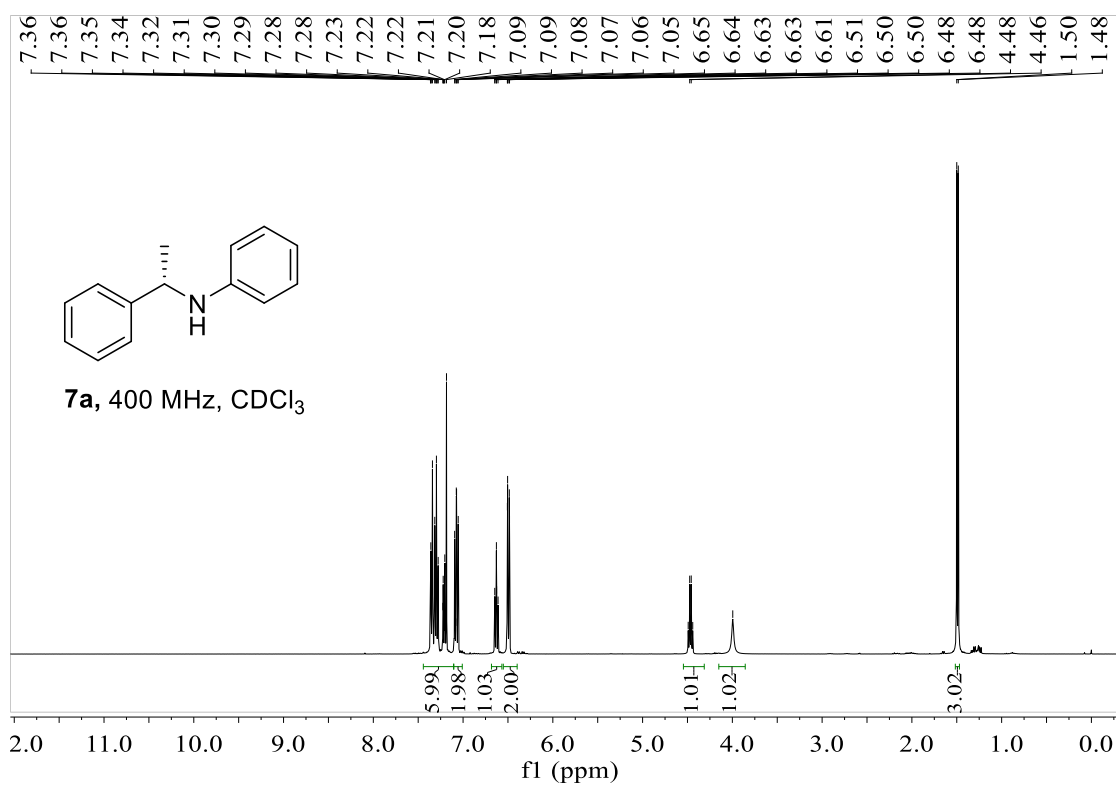

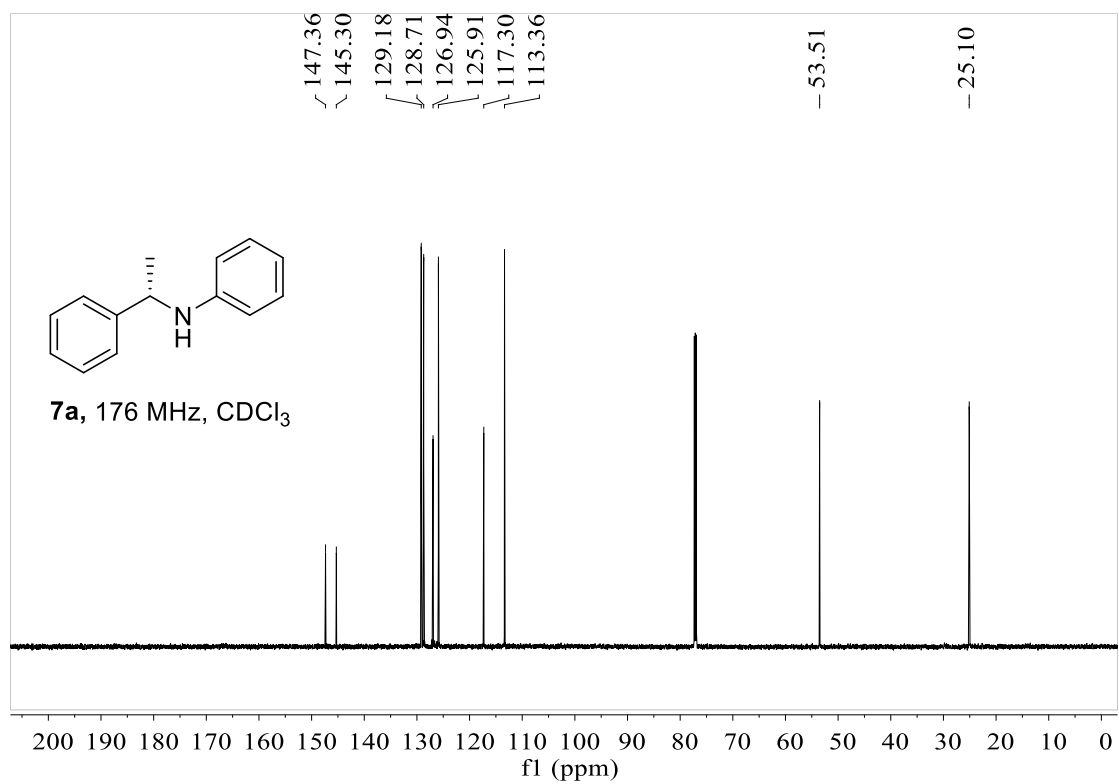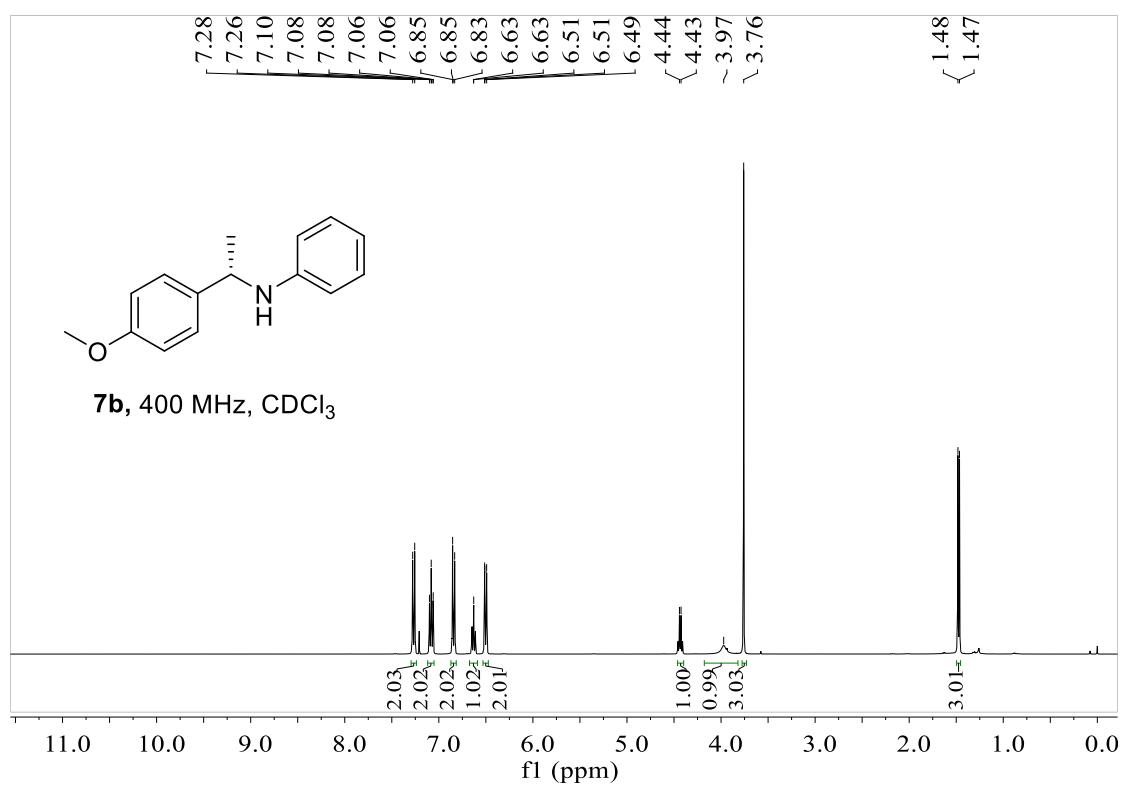

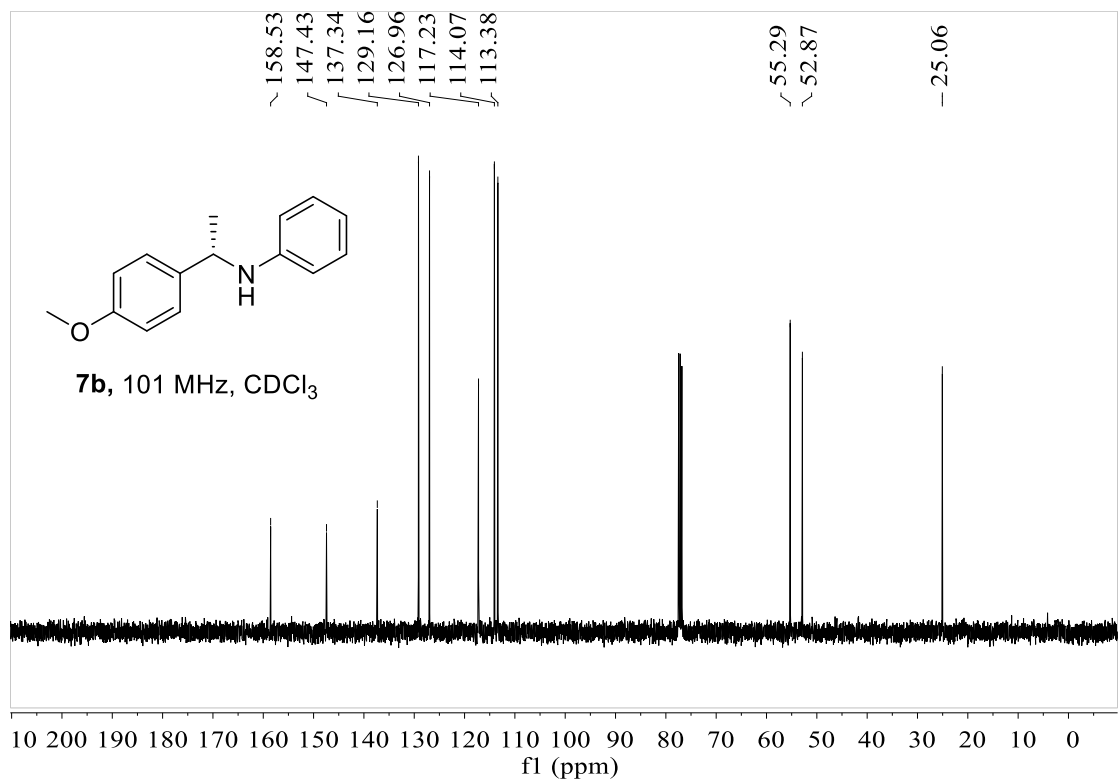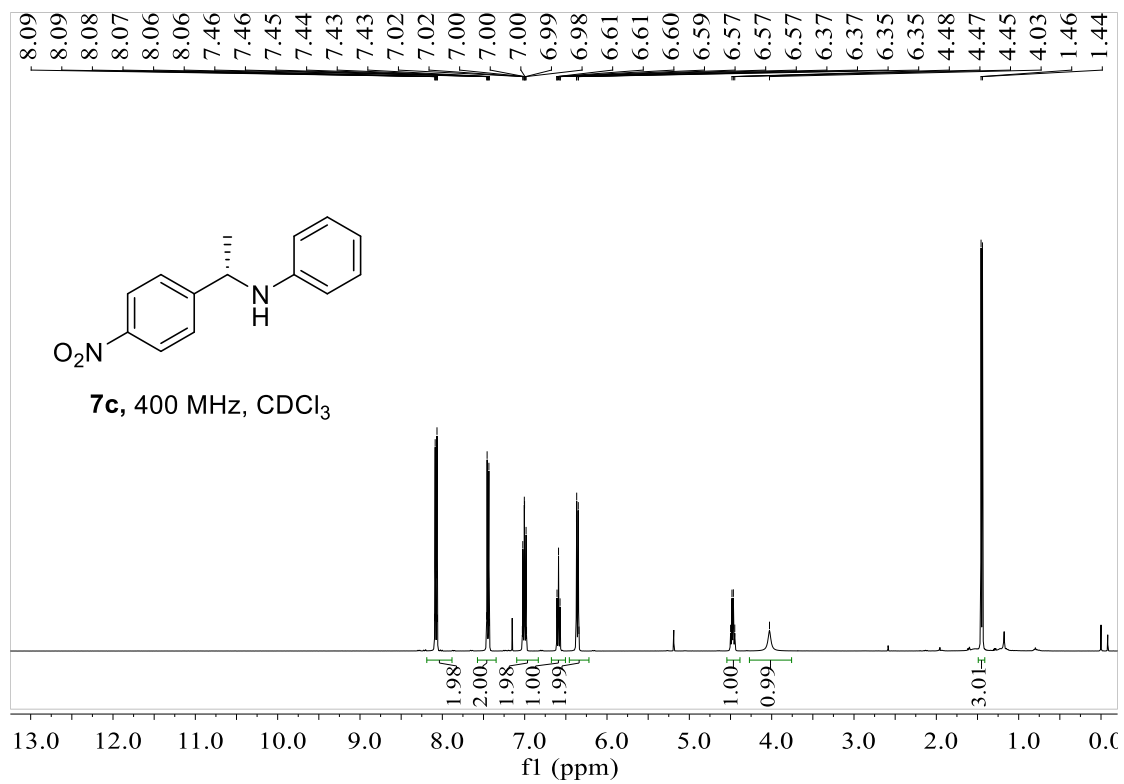

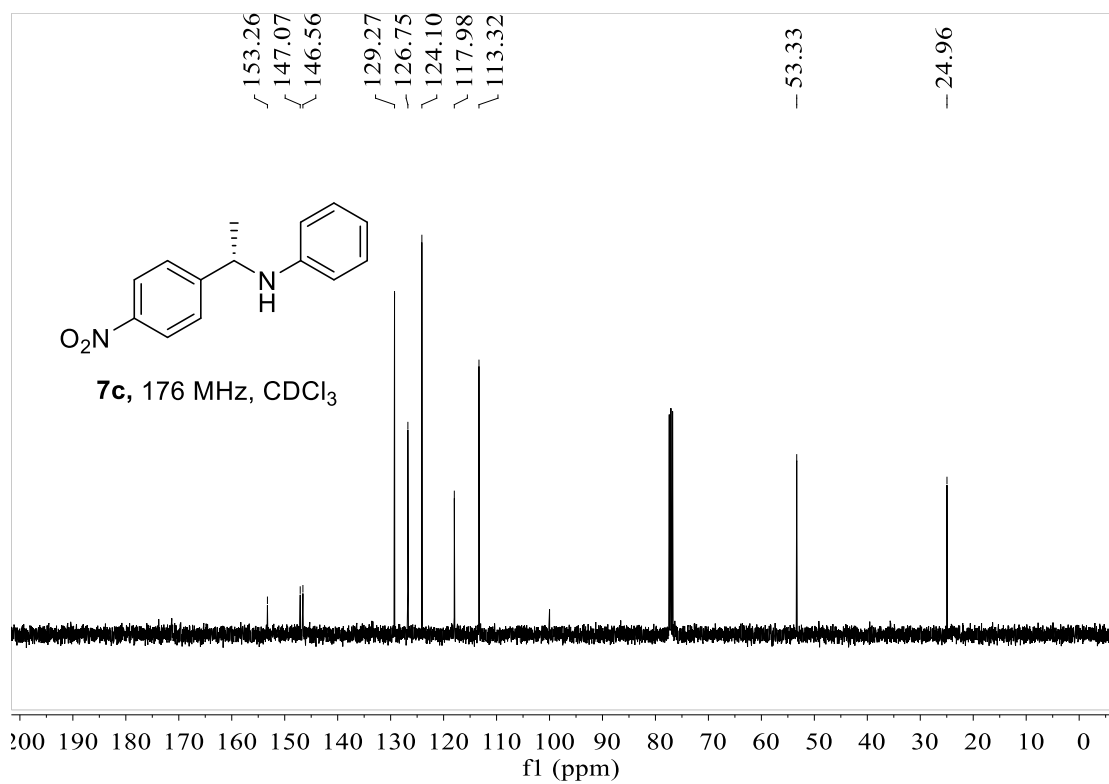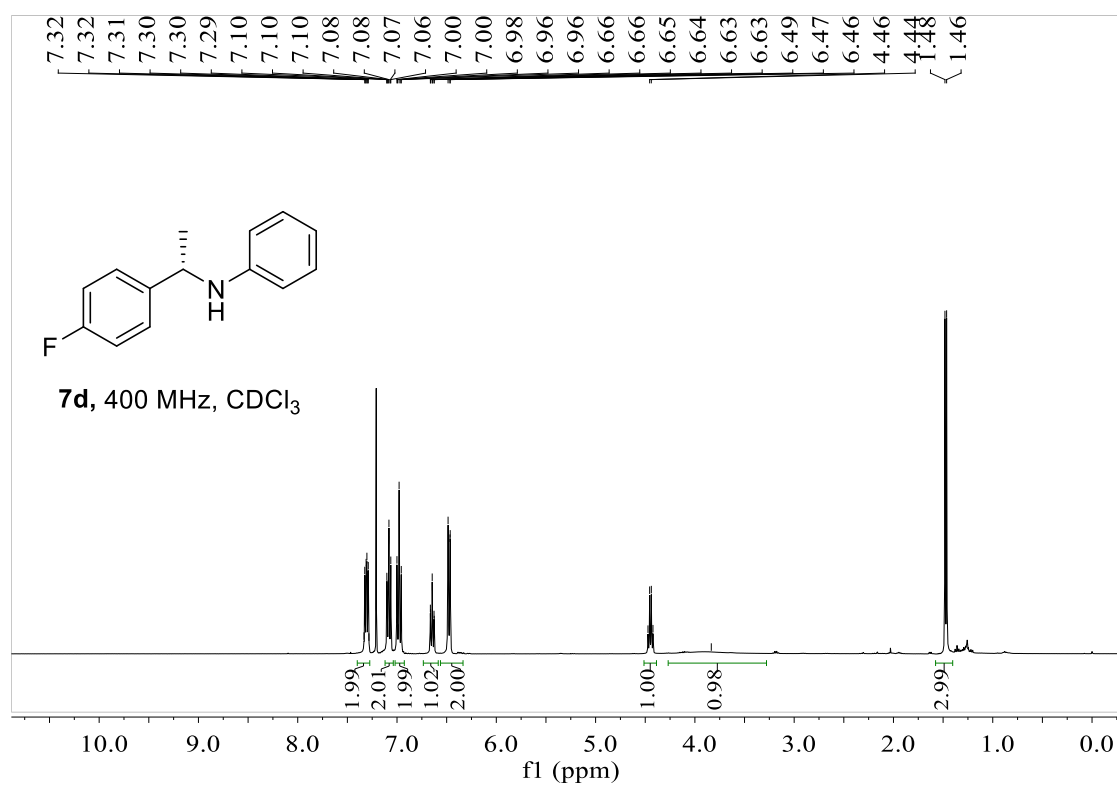

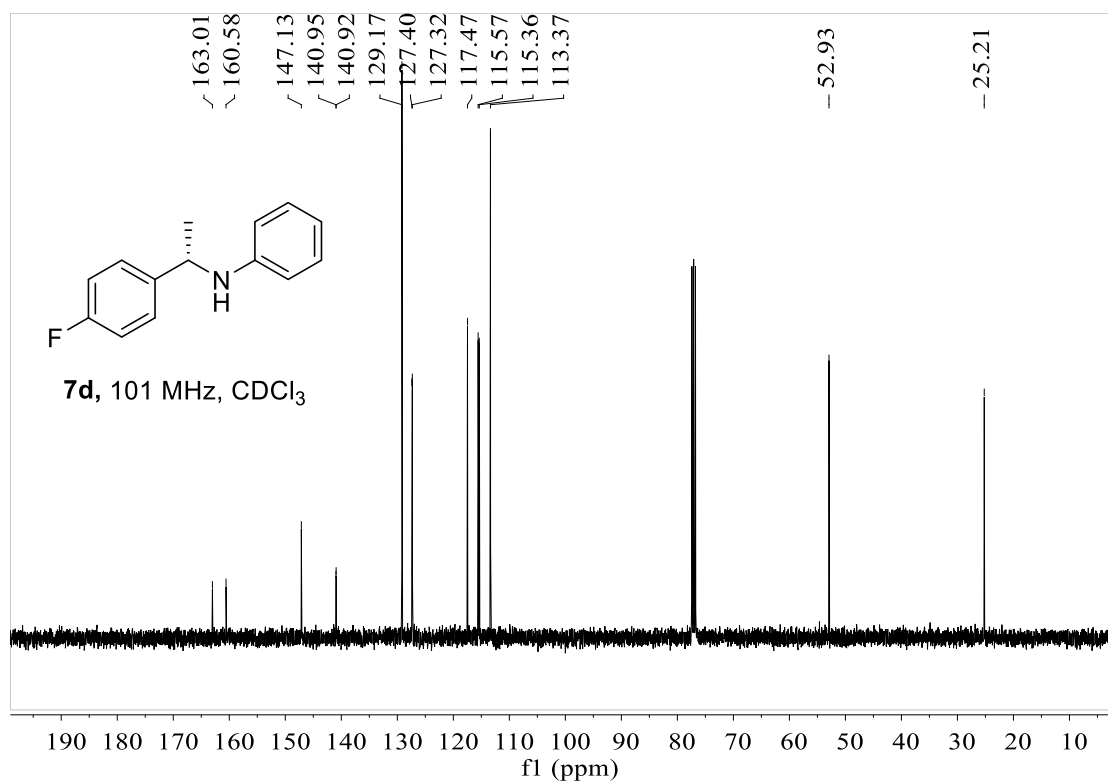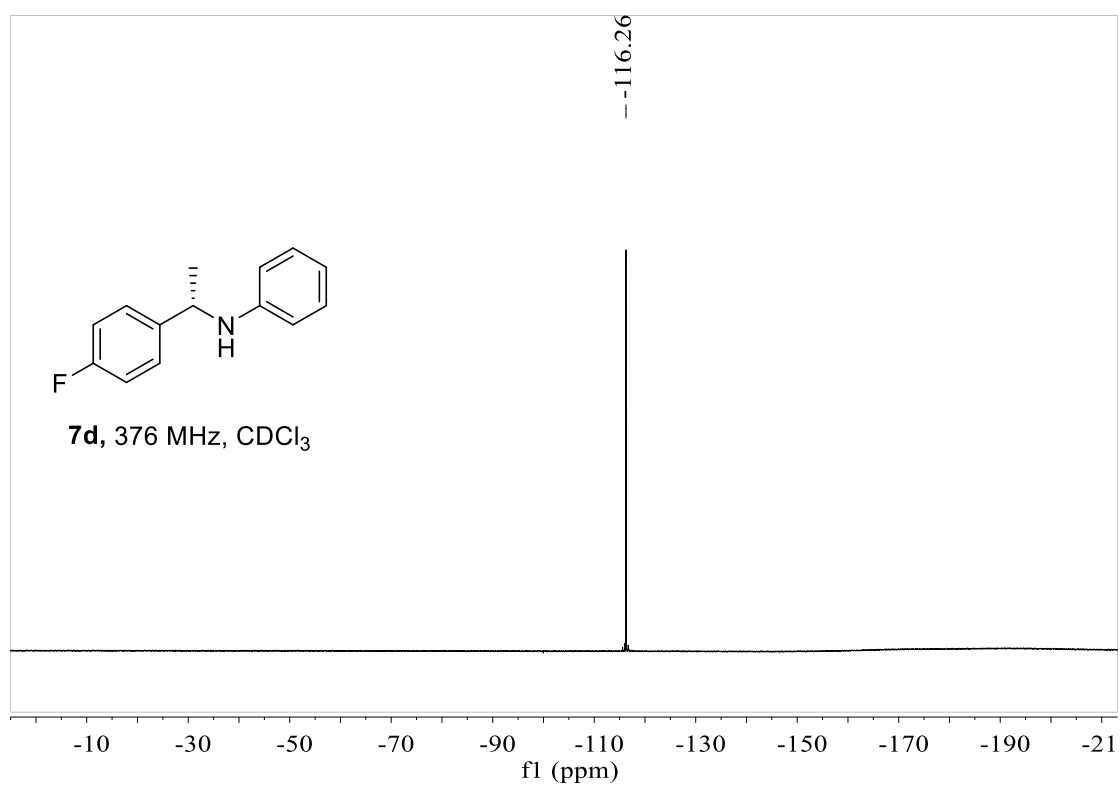

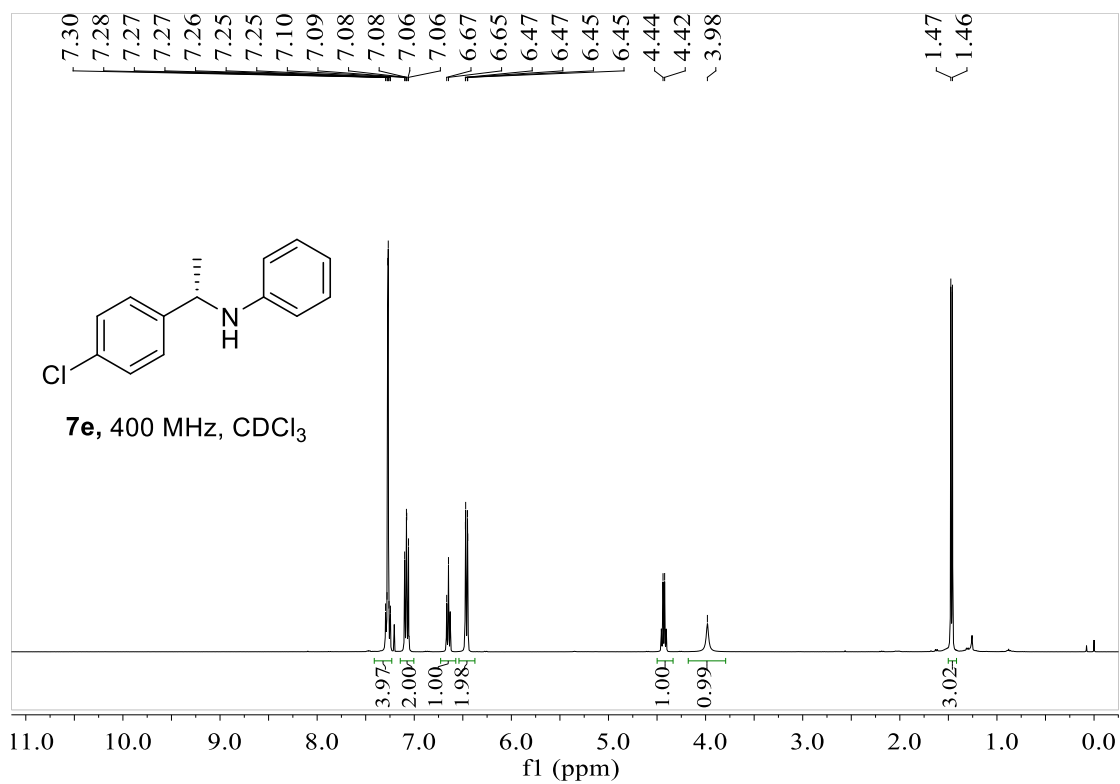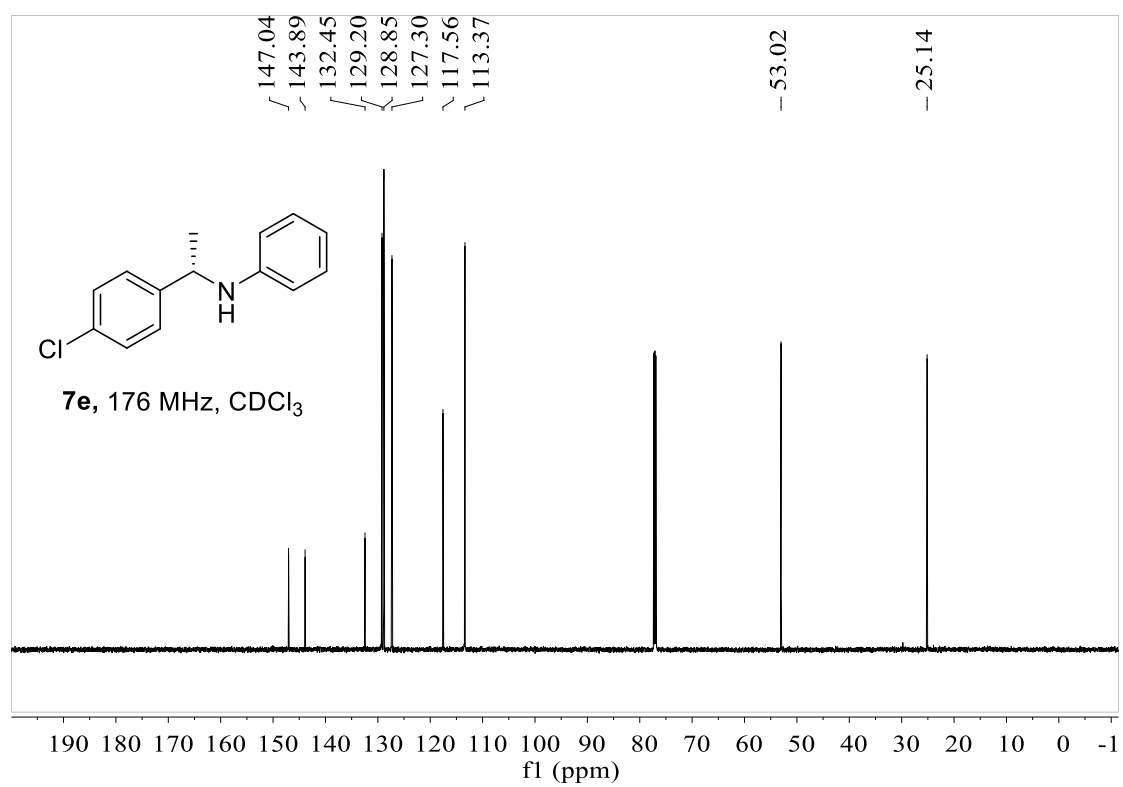

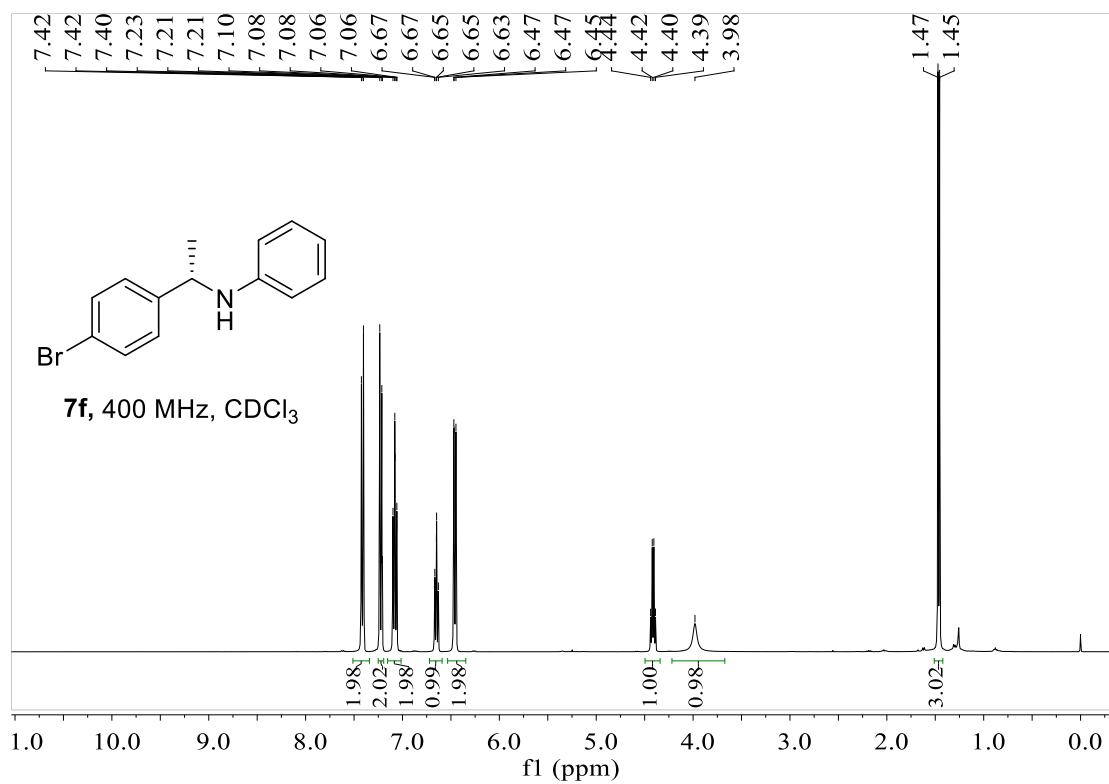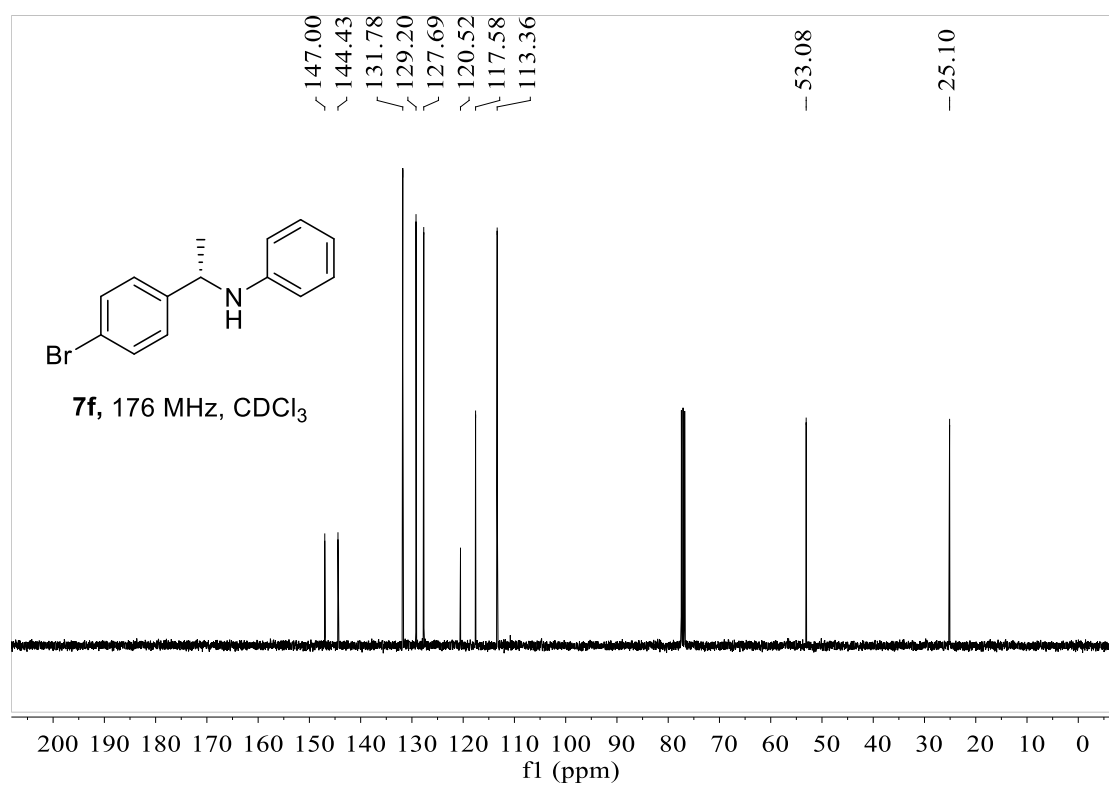

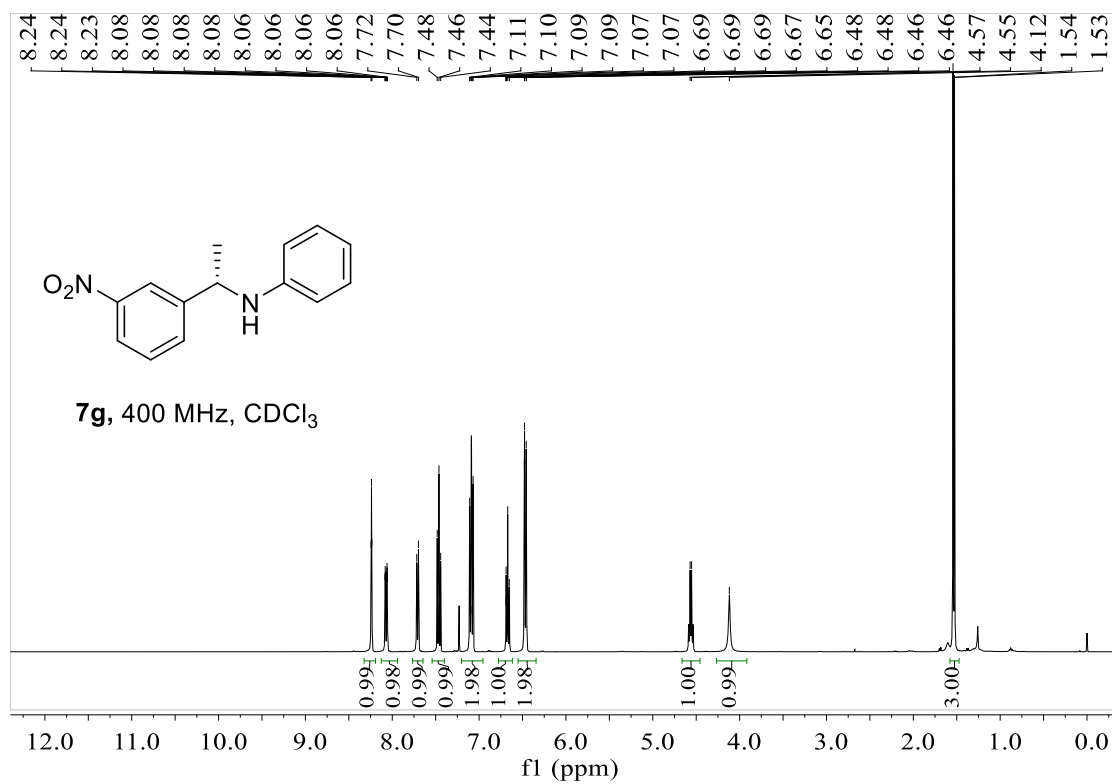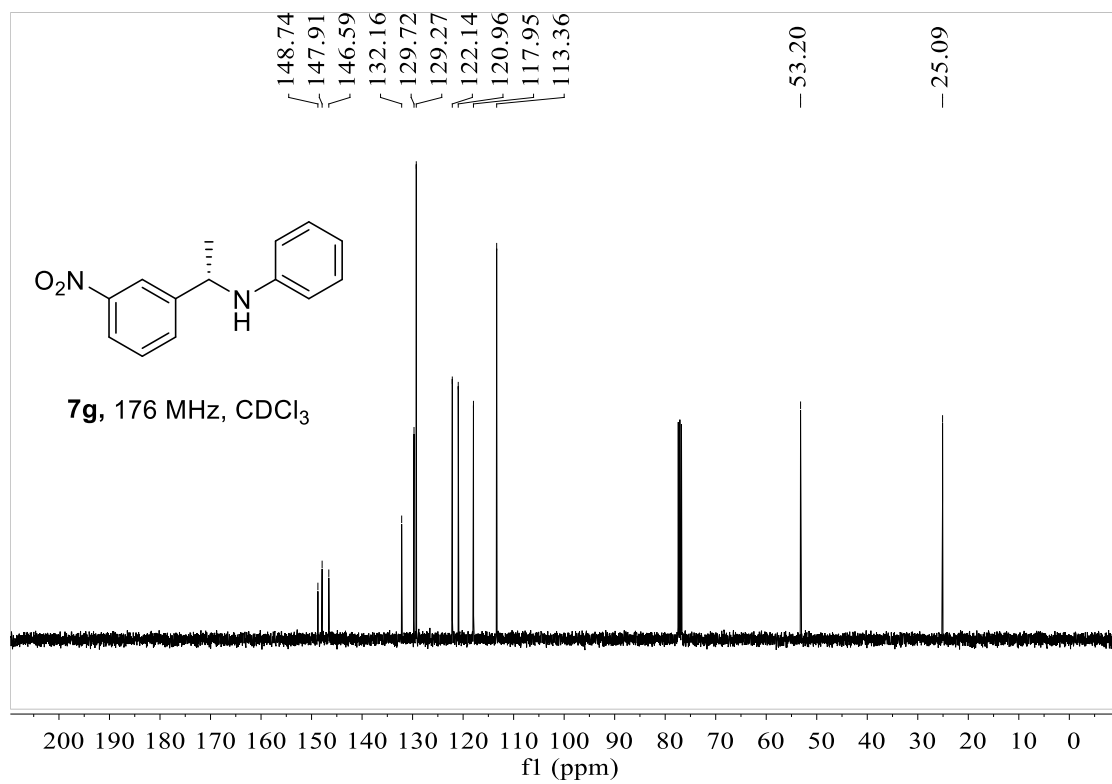

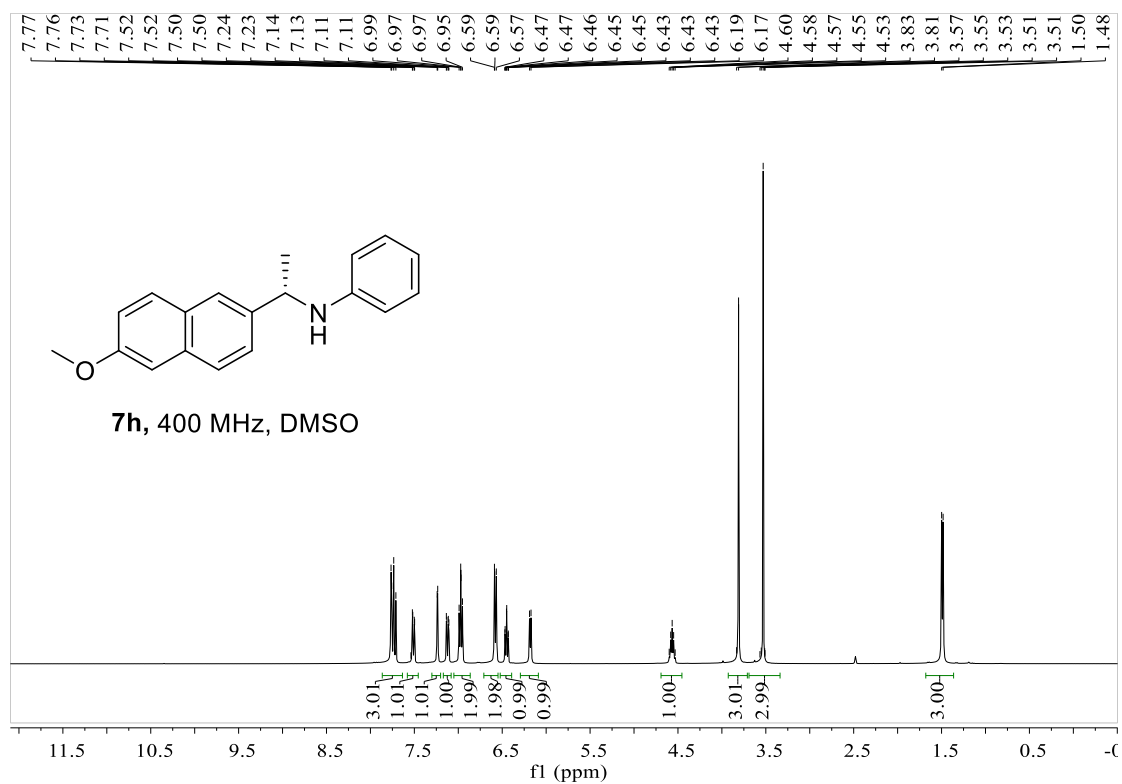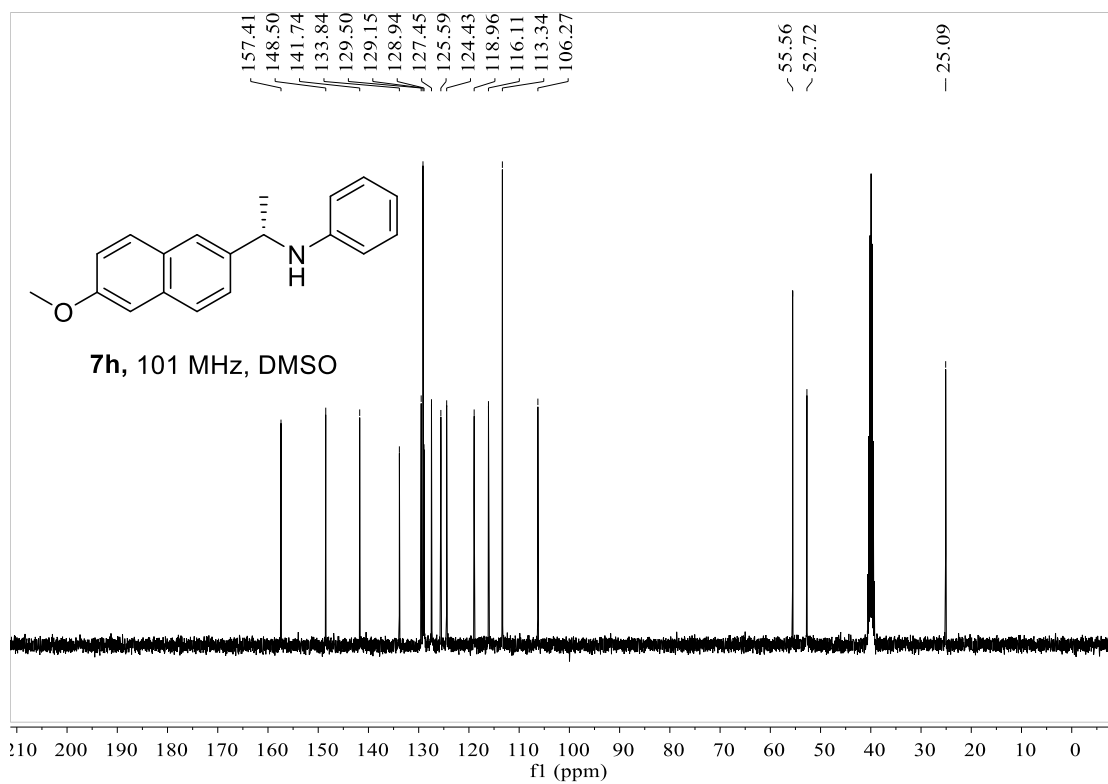

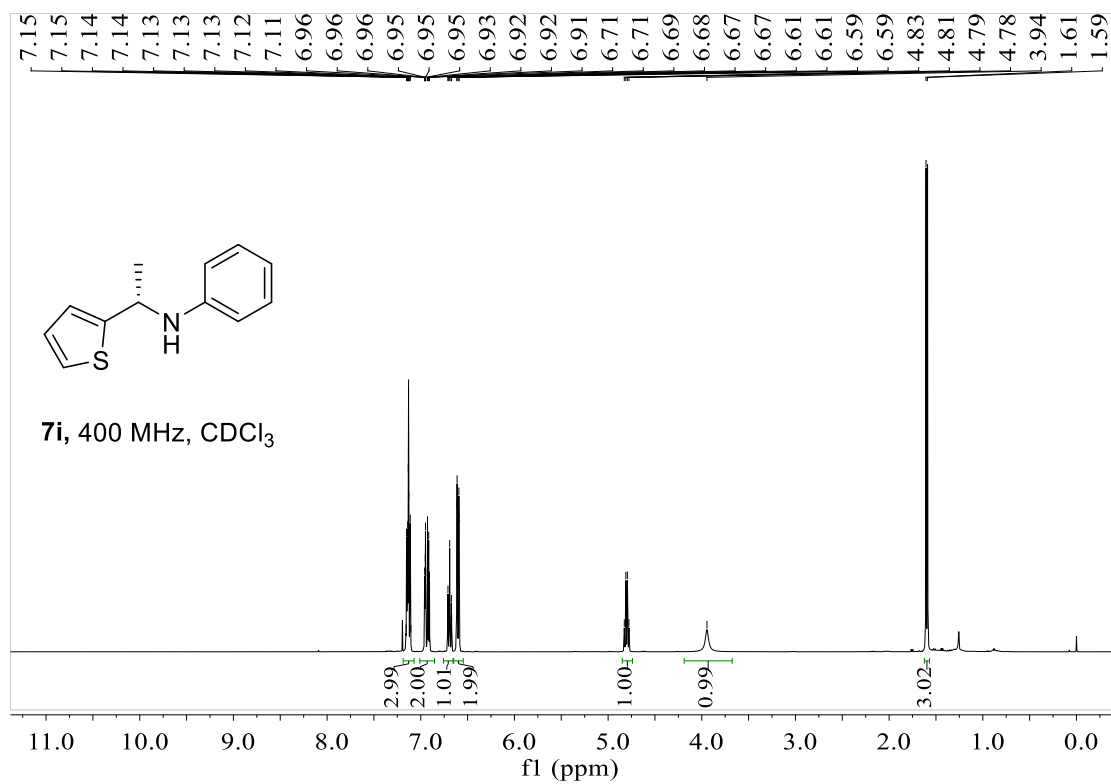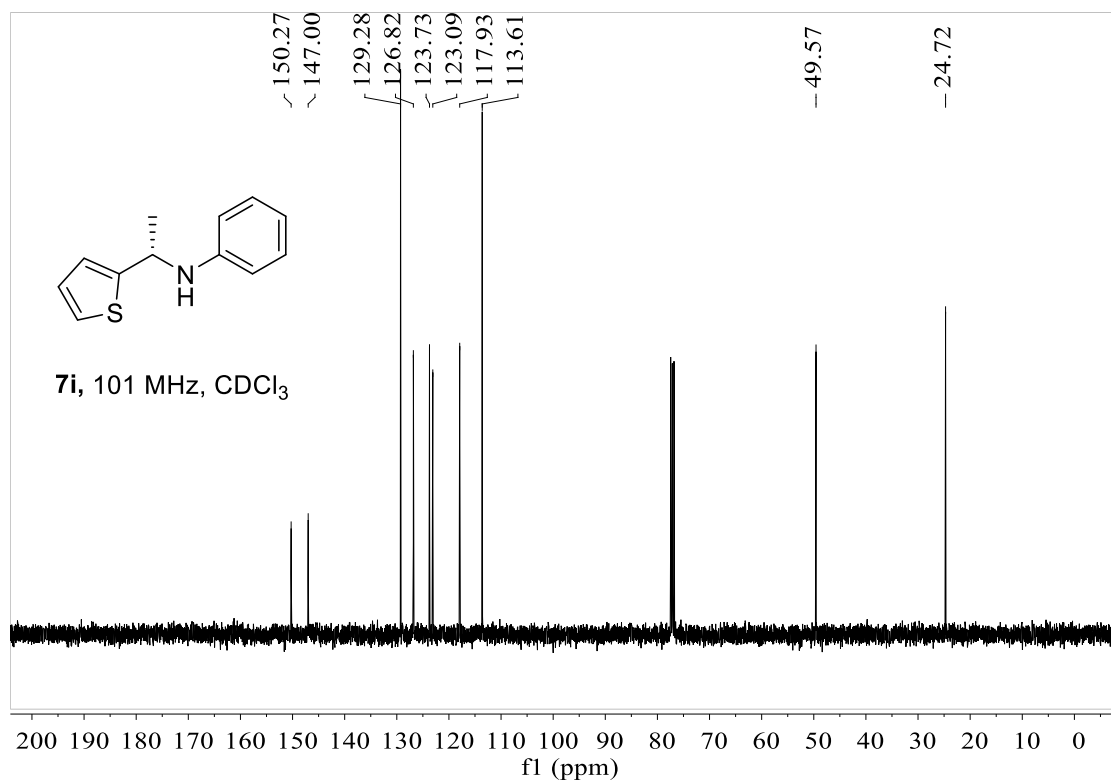

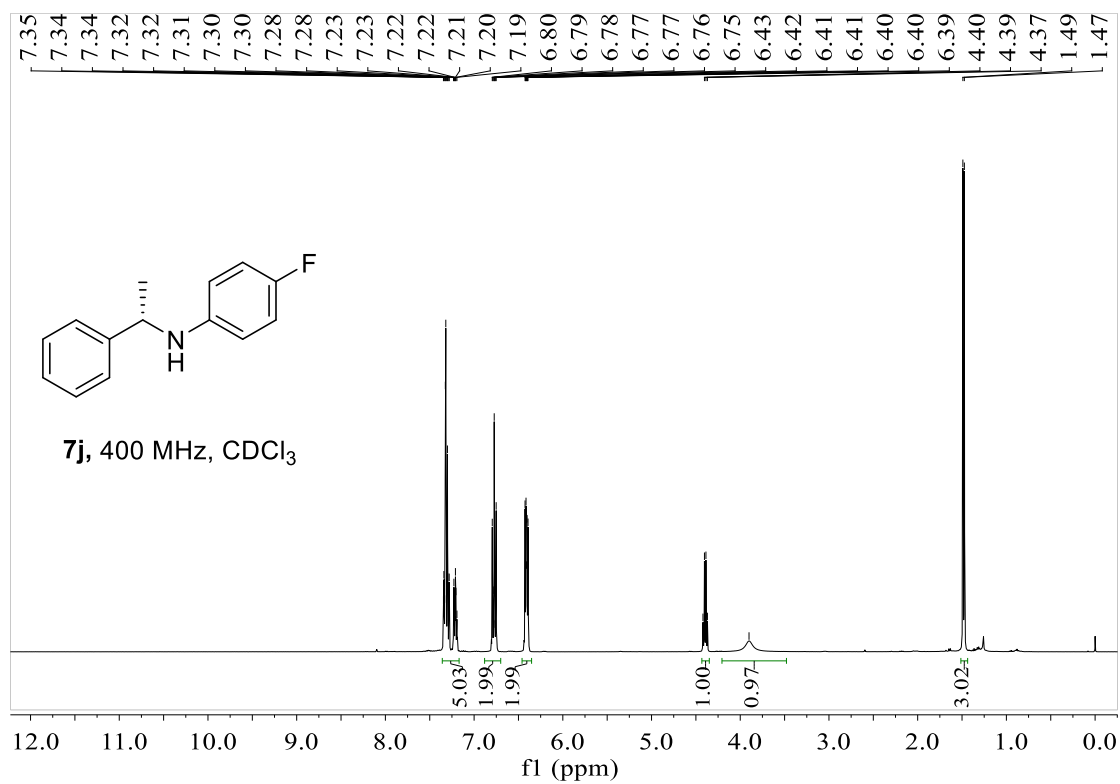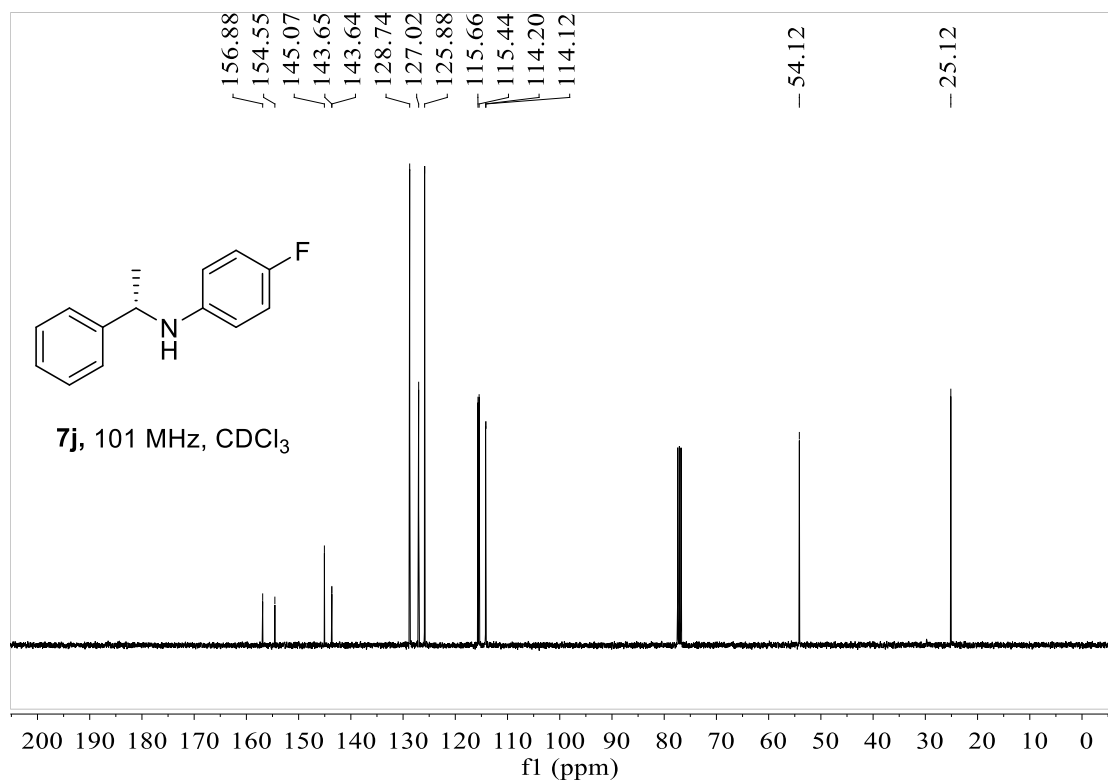

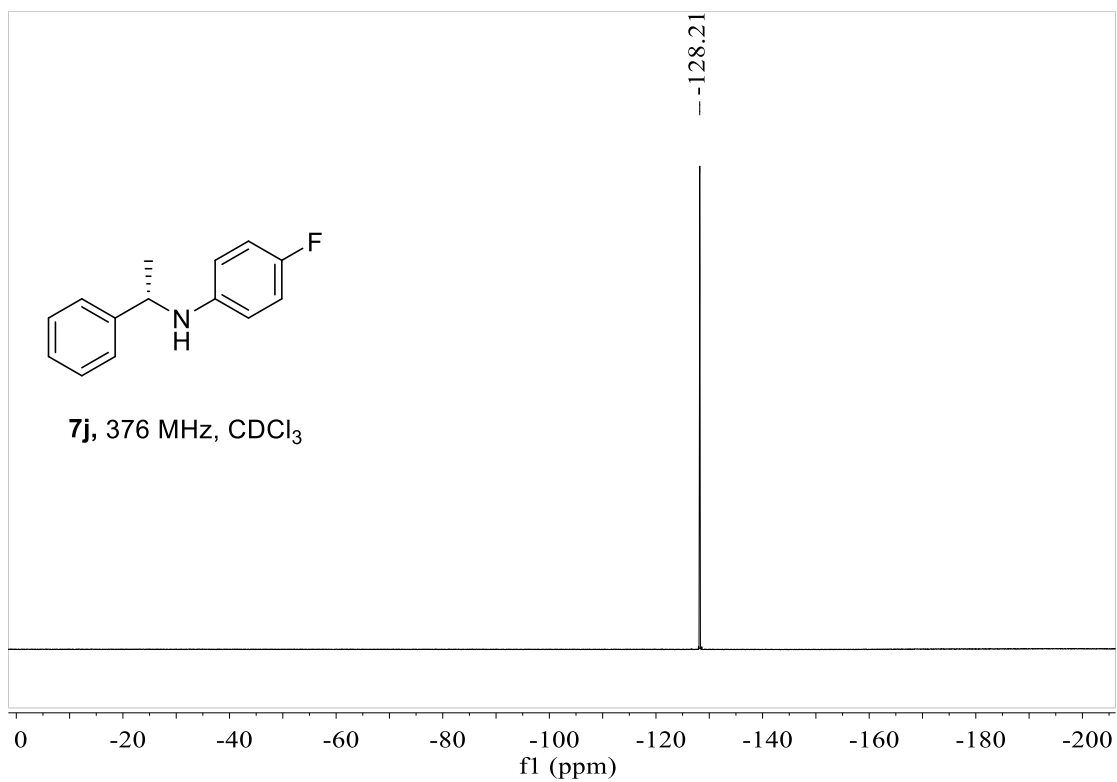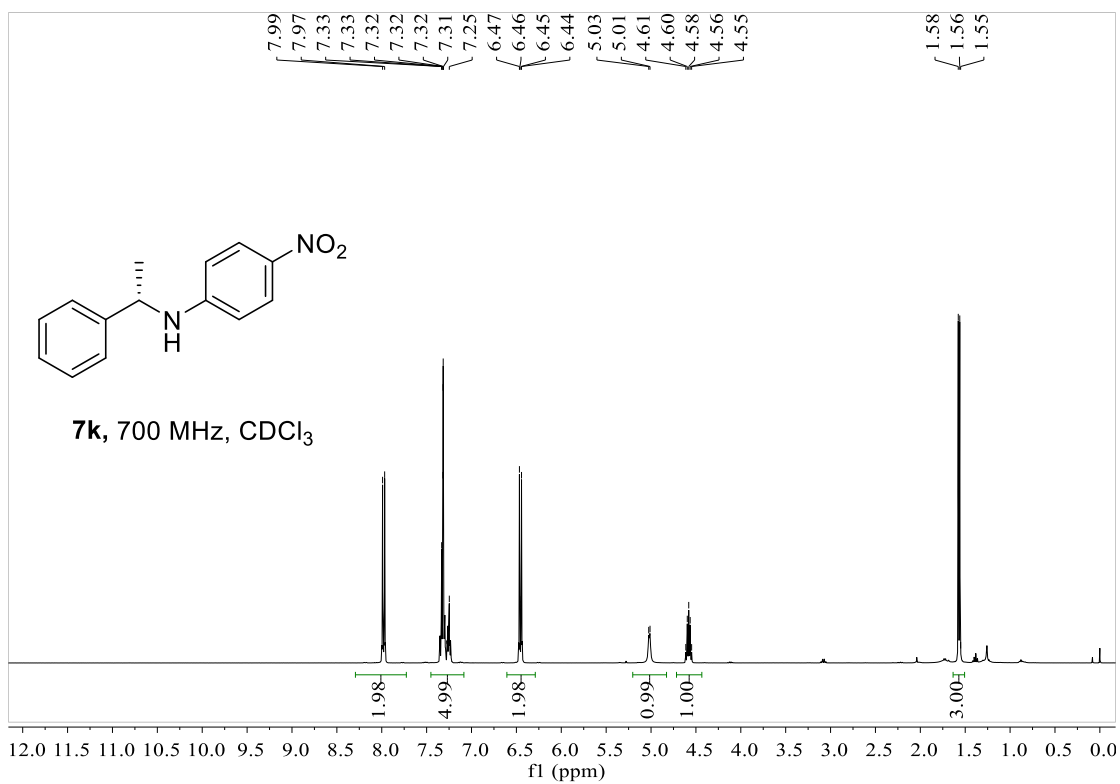

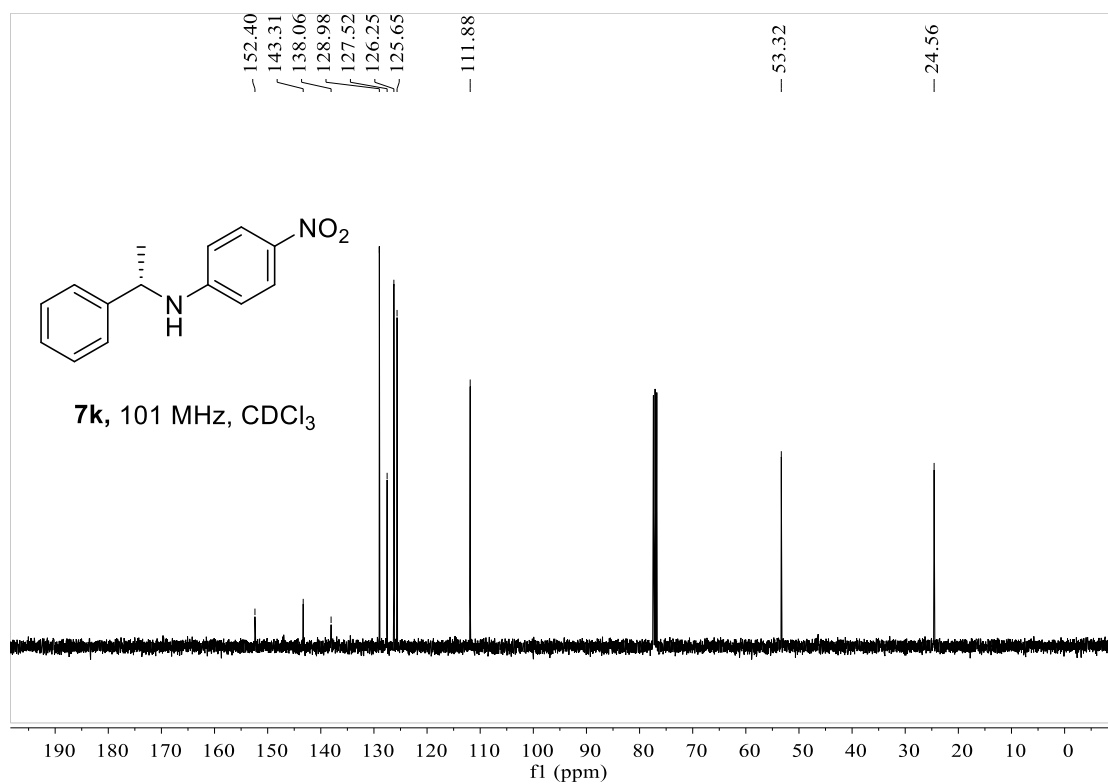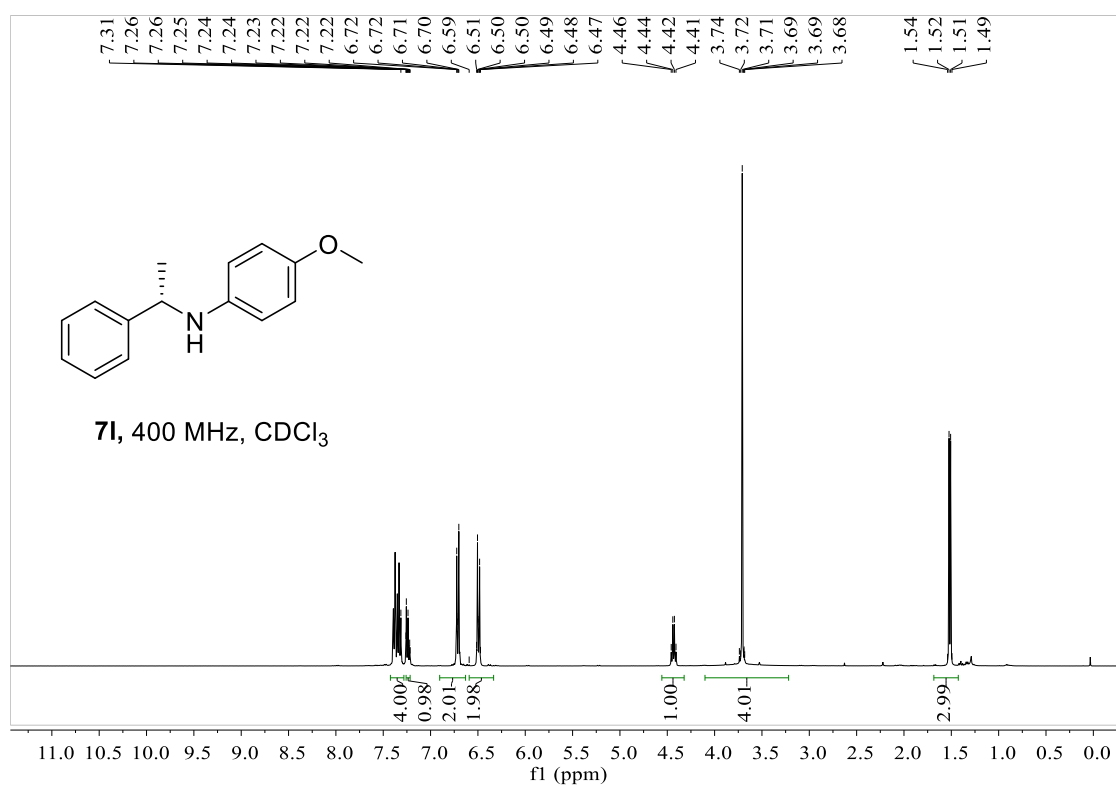



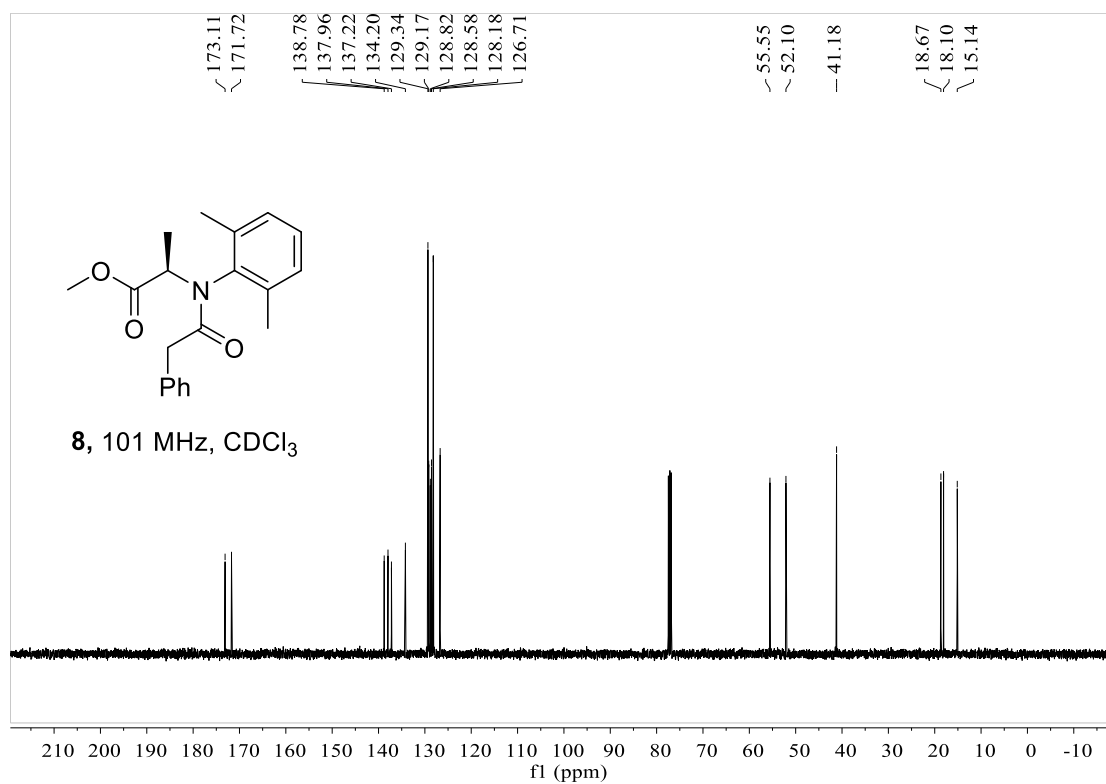

Supplement: d2ob01801b1.pdf [file d2ob01801b1.pdf]
